# Supplementary material for: What's that gene (or protein)? Online resources for exploring functions of genes, transcripts, and proteins
Source: PubMed Central journal article supplement — Mol Biol Cell. 2014 Apr 15;25(8):1187–201. doi: 10.1091/mbc.E13-10-0602 (PMC3982986; doi:10.1091/mbc.e13-10-0602), 2014-04-15
Supplement: supp_25.8.1187_CombinedSupMats1.pdf [file supp_25.8.1187_CombinedSupMats1.pdf]

# Supplemental Materials

*Molecular Biology of the Cell*

Hutchins

**Supplemental Materials for:**

**What's that gene (or protein)?**

**Online resources for exploring functions of genes, transcripts and proteins**

James R. A. Hutchins

Institute of Human Genetics, CNRS, 141 rue de la Cardonille, 34396 Montpellier, France.

Email: [james.hutchins@igh.cnrs.fr](mailto:james.hutchins@igh.cnrs.fr)

**Note:**

Periodic updates to this Supplemental Materials document will be made available on the author's personal website: <http://www.jrahutchins.net>

## Supplemental Table S1

### Species-specific gene databases

| Species                                 | Resource  | Example web-links                                                                                                                                                                                                                                                                                                                                                                                                                                                                                                                                                                                                                                                                                                                                                                                                                                                                                                                                                                                                                                                                                                          | Reference                        |
|-----------------------------------------|-----------|----------------------------------------------------------------------------------------------------------------------------------------------------------------------------------------------------------------------------------------------------------------------------------------------------------------------------------------------------------------------------------------------------------------------------------------------------------------------------------------------------------------------------------------------------------------------------------------------------------------------------------------------------------------------------------------------------------------------------------------------------------------------------------------------------------------------------------------------------------------------------------------------------------------------------------------------------------------------------------------------------------------------------------------------------------------------------------------------------------------------------|----------------------------------|
| <i>Arabidopsis thaliana</i>             | TAIR      | Home page: <a href="http://www.arabidopsis.org/">http://www.arabidopsis.org/</a><br>Query via (a) gene name (b) locus (c) UniProt ID:<br>(a) <a href="http://www.arabidopsis.org/servlets/Search?type=general&amp;search_action=detail&amp;sub_type=gene&amp;name=cdc2">http://www.arabidopsis.org/servlets/Search?type=general&amp;search_action=detail&amp;sub_type=gene&amp;name=cdc2</a><br>(b) <a href="http://www.arabidopsis.org/servlets/Search?type=general&amp;search_action=detail&amp;sub_type=gene&amp;name=AT1G08260">http://www.arabidopsis.org/servlets/Search?type=general&amp;search_action=detail&amp;sub_type=gene&amp;name=AT1G08260</a> (DNA pol)<br>(c) <a href="http://www.arabidopsis.org/servlets/Search?type=general&amp;search_action=detail&amp;sub_type=protein&amp;name=F4KF55">http://www.arabidopsis.org/servlets/Search?type=general&amp;search_action=detail&amp;sub_type=protein&amp;name=F4KF55</a>                                                                                                                                                                                   | (Lamesch <i>et al.</i> , 2012)   |
| Ascidians<br>(various species)          | ANISEED   | Home page: <a href="http://www.aniseed.cnrs.fr/">http://www.aniseed.cnrs.fr/</a><br>Query via any term, e.g. gene name:<br><a href="http://www.aniseed.cnrs.fr/aniseed/aniseed/?search=Cdc2">http://www.aniseed.cnrs.fr/aniseed/aniseed/?search=Cdc2</a> (Cdk1)<br>Query via species name plus gene term:<br><a href="http://www.aniseed.cnrs.fr/v3/gene-result.php?species=Ciona+intestinalis&amp;name=Pole">http://www.aniseed.cnrs.fr/v3/gene-result.php?species=Ciona+intestinalis&amp;name=Pole</a> (DNA pol)<br>Direct link to Transcript model card via Ensembl transcript ID:<br><a href="http://www.aniseed.cnrs.fr/v3/molecule-gene.php?name=ENSCINT00000009154">http://www.aniseed.cnrs.fr/v3/molecule-gene.php?name=ENSCINT00000009154</a>                                                                                                                                                                                                                                                                                                                                                                     | (Tassy <i>et al.</i> , 2010)     |
| <i>Aspergillus</i><br>(various species) | AspGD     | Home page: <a href="http://www.aspergillusgenome.org/">http://www.aspergillusgenome.org/</a><br>Direct link to Summary page via (a) gene name (b) systematic name (c) AspGD ID:<br>(a) <a href="http://www.aspergillusgenome.org/cgi-bin/locus.pl?locus=nimX">http://www.aspergillusgenome.org/cgi-bin/locus.pl?locus=nimX</a> (Cdk1)<br>(b) <a href="http://www.aspergillusgenome.org/cgi-bin/locus.pl?locus=AN3067">http://www.aspergillusgenome.org/cgi-bin/locus.pl?locus=AN3067</a> (DNA pol)<br>(c) <a href="http://www.aspergillusgenome.org/cgi-bin/locus.pl?locus=ASPL0000080189">http://www.aspergillusgenome.org/cgi-bin/locus.pl?locus=ASPL0000080189</a><br>Query via UniProt ID:<br><a href="http://www.aspergillusgenome.org/cgi-bin/search/textSearch?query=P11837">http://www.aspergillusgenome.org/cgi-bin/search/textSearch?query=P11837</a>                                                                                                                                                                                                                                                            | (Arnaud <i>et al.</i> , 2012)    |
| <i>Caenorhabditis elegans</i>           | WormBase  | Home page: <a href="http://www.wormbase.org/">http://www.wormbase.org/</a><br>Direct link to Gene page via (a) gene name (b) sequence code (c) WormBase ID (d) RefSeq nucleotide:<br>(a) <a href="http://www.wormbase.org/search/gene/cdk-1">http://www.wormbase.org/search/gene/cdk-1</a> (Cdk1)<br>(b) <a href="http://www.wormbase.org/search/gene/F08B4.5">http://www.wormbase.org/search/gene/F08B4.5</a> (DNA pol E2)<br>(c) <a href="http://www.wormbase.org/search/gene/WBGene00000423">http://www.wormbase.org/search/gene/WBGene00000423</a><br>(d) <a href="http://www.wormbase.org/search/gene/NM_060013">http://www.wormbase.org/search/gene/NM_060013</a><br>Direct link to protein page via UniProt ID:<br><a href="http://www.wormbase.org/search/protein/P91870">http://www.wormbase.org/search/protein/P91870</a>                                                                                                                                                                                                                                                                                        | (Harris <i>et al.</i> , 2014)    |
| <i>Danio rerio</i>                      | ZFIN      | Home page: <a href="http://zfin.org/">http://zfin.org/</a><br>Direct link to gene page via ZFIN ID:<br><a href="http://zfin.org/ZDB-GENE-030131-574">http://zfin.org/ZDB-GENE-030131-574</a><br>Query via (a) gene symbol (b) RefSeq nucleotide (c) UniProt ID:<br>(a) <a href="http://zfin.org/action/quicksearch/query?query=tp53">http://zfin.org/action/quicksearch/query?query=tp53</a> (p53)<br>(b) <a href="http://zfin.org/action/quicksearch/query?query=NM_212564">http://zfin.org/action/quicksearch/query?query=NM_212564</a> (Cdk1)<br>(c) <a href="http://zfin.org/action/quicksearch/query?query=Q6DRD3">http://zfin.org/action/quicksearch/query?query=Q6DRD3</a> (DNA pol β)                                                                                                                                                                                                                                                                                                                                                                                                                              | (Howe <i>et al.</i> , 2013)      |
| <i>Dictyostelium discoideum</i>         | dictyBase | Home page: <a href="http://dictybase.org/">http://dictybase.org/</a><br>Direct link to Gene Summary via (a) gene name (b) gene ID (c) sequence ID (d) GenBank nucleotide (e) UniProt ID:<br>(a) <a href="http://dictybase.org/gene/cdk1">http://dictybase.org/gene/cdk1</a><br>(b) <a href="http://dictybase.org/gene/DDB_G0282191">http://dictybase.org/gene/DDB_G0282191</a> (DNA pol A1)<br>(c) <a href="http://dictybase.org/db/cgi-bin/search/search.pl?query=DDB0001991">http://dictybase.org/db/cgi-bin/search/search.pl?query=DDB0001991</a><br>(d) <a href="http://dictybase.org/db/cgi-bin/search/search.pl?query=L09720">http://dictybase.org/db/cgi-bin/search/search.pl?query=L09720</a><br>(e) <a href="http://dictybase.org/db/cgi-bin/search/search.pl?query=P33519">http://dictybase.org/db/cgi-bin/search/search.pl?query=P33519</a>                                                                                                                                                                                                                                                                     | (Basu <i>et al.</i> , 2013)      |
| <i>Drosophila melanogaster</i>          | FlyBase   | Home page: <a href="http://flybase.org/">http://flybase.org/</a><br>Query via gene name or symbol:<br><a href="http://flybase.org/cgi-bin/quicksearch_solr.cgi?data_class=FBgn&amp;context=leonardo">http://flybase.org/cgi-bin/quicksearch_solr.cgi?data_class=FBgn&amp;context=leonardo</a><br>Direct link to Gene Report via (a) FlyBase ID (b) RefSeq nucleotide (c) RefSeq protein (d) UniProt ID:<br>(a) <a href="http://flybase.org/reports/FBgn0004106">http://flybase.org/reports/FBgn0004106</a> (Cdk1)<br>(b) <a href="http://flybase.org/cgi-bin/quicksearch_solr.cgi?data_class=FBgn&amp;context=NM_079738">http://flybase.org/cgi-bin/quicksearch_solr.cgi?data_class=FBgn&amp;context=NM_079738</a> (DNA pol ε)<br>(c) <a href="http://flybase.org/cgi-bin/quicksearch_solr.cgi?data_class=FBgn&amp;context=NP_649324">http://flybase.org/cgi-bin/quicksearch_solr.cgi?data_class=FBgn&amp;context=NP_649324</a><br>(d) <a href="http://flybase.org/cgi-bin/quicksearch_solr.cgi?data_class=FBgn&amp;context=O61661">http://flybase.org/cgi-bin/quicksearch_solr.cgi?data_class=FBgn&amp;context=O61661</a> | (St Pierre <i>et al.</i> , 2014) |

## Supplemental Table S1 (continued)

### Species-specific gene databases

| Species                                              | Resource           | Example web-links                                                                                                                                                                                                                                                                                                                                                                                                                                                                                                                                                                                                                                                                                                                                                                                                                                                                                                                                                                                                                                                                                                                                                                                                                                       | Reference                             |
|------------------------------------------------------|--------------------|---------------------------------------------------------------------------------------------------------------------------------------------------------------------------------------------------------------------------------------------------------------------------------------------------------------------------------------------------------------------------------------------------------------------------------------------------------------------------------------------------------------------------------------------------------------------------------------------------------------------------------------------------------------------------------------------------------------------------------------------------------------------------------------------------------------------------------------------------------------------------------------------------------------------------------------------------------------------------------------------------------------------------------------------------------------------------------------------------------------------------------------------------------------------------------------------------------------------------------------------------------|---------------------------------------|
| <i>Homo sapiens</i>                                  | HGNC               | Home page: <a href="http://www.genenames.org/">http://www.genenames.org/</a><br>Query via (a) gene term (b) Ensembl (c) RefSeq nucleotide (d) UniProt ID:<br>(a) <a href="http://www.genenames.org/cgi-bin/search?search=TP53">http://www.genenames.org/cgi-bin/search?search=TP53</a> (p53)<br>(b) <a href="http://www.genenames.org/cgi-bin/search?search=ENSG00000170312">http://www.genenames.org/cgi-bin/search?search=ENSG00000170312</a> (Cdk1)<br>(c) <a href="http://www.genenames.org/cgi-bin/search?search=NM_006231">http://www.genenames.org/cgi-bin/search?search=NM_006231</a> (DNA pol ε)<br>(d) <a href="http://www.genenames.org/cgi-bin/search?search=Q96CS2">http://www.genenames.org/cgi-bin/search?search=Q96CS2</a><br>Direct link to Symbol Report page via HGNC ID:<br><a href="http://www.genenames.org/data/hgnc_data.php?hgnc_id=33830">http://www.genenames.org/data/hgnc_data.php?hgnc_id=33830</a>                                                                                                                                                                                                                                                                                                                       | (Gray <i>et al.</i> , 2013)           |
| <i>Mus musculus</i>                                  | MGI                | Home page: <a href="http://www.informatics.jax.org/">http://www.informatics.jax.org/</a><br>Query via (a) gene symbol (b) RefSeq nucleotide or protein (c) UniProt ID:<br>(a) <a href="http://www.informatics.jax.org/searchtool/Search.do?query=Cdk1">http://www.informatics.jax.org/searchtool/Search.do?query=Cdk1</a><br>(b) <a href="http://www.informatics.jax.org/searchtool/Search.do?query=NM_011132">http://www.informatics.jax.org/searchtool/Search.do?query=NM_011132</a> (DNA pol ε)<br>(c) <a href="http://www.informatics.jax.org/searchtool/Search.do?query=Q65Z40">http://www.informatics.jax.org/searchtool/Search.do?query=Q65Z40</a><br>Direct link to Gene Detail page via MGI ID:<br><a href="http://www.informatics.jax.org/marker/MGI:98834">http://www.informatics.jax.org/marker/MGI:98834</a> (p53)                                                                                                                                                                                                                                                                                                                                                                                                                         | (Drabkin and Blake, 2012)             |
| <i>Rattus norvegicus</i>                             | RGD                | Home page: <a href="http://rgd.mcw.edu/">http://rgd.mcw.edu/</a><br>Query via gene symbol:<br>(a) <a href="http://rgd.mcw.edu/rgdweb/search/genes.html?term=Tp53">http://rgd.mcw.edu/rgdweb/search/genes.html?term=Tp53</a> (p53)<br>Direct link to Gene page via RGD ID:<br><a href="http://rgd.mcw.edu/rgdweb/report/gene/main.html?id=621175">http://rgd.mcw.edu/rgdweb/report/gene/main.html?id=621175</a>                                                                                                                                                                                                                                                                                                                                                                                                                                                                                                                                                                                                                                                                                                                                                                                                                                          | (Laulederkind <i>et al.</i> , 2012)   |
| <i>Saccharomyces cerevisiae</i>                      | SGD                | Home page: <a href="http://www.yeastgenome.org/">http://www.yeastgenome.org/</a><br>Direct link via (a) gene name (b) systematic name:<br>(a) <a href="http://www.yeastgenome.org/cgi-bin/locus.fpl?locus=CDC28">http://www.yeastgenome.org/cgi-bin/locus.fpl?locus=CDC28</a> (Cdk1)<br>(b) <a href="http://www.yeastgenome.org/cgi-bin/locus.fpl?locus=YNL262W">http://www.yeastgenome.org/cgi-bin/locus.fpl?locus=YNL262W</a> (DNA pol 2)<br>Query via (c) RefSeq nucleotide or protein (d) UniProt ID:<br>(c) <a href="http://www.yeastgenome.org/cgi-bin/search/luceneQS.fpl?query=NM_001184023">http://www.yeastgenome.org/cgi-bin/search/luceneQS.fpl?query=NM_001184023</a><br>(d) <a href="http://www.yeastgenome.org/cgi-bin/search/luceneQS.fpl?query=P00546">http://www.yeastgenome.org/cgi-bin/search/luceneQS.fpl?query=P00546</a>                                                                                                                                                                                                                                                                                                                                                                                                         | (Costanzo <i>et al.</i> , 2014)       |
| <i>Schizosaccharomyces pombe</i>                     | PomBase            | Home page: <a href="http://www.pombase.org/">http://www.pombase.org/</a><br>Query via any term, e.g. gene name:<br><a href="http://www.pombase.org/search/ensembl/cdc2">http://www.pombase.org/search/ensembl/cdc2</a> (Cdk1)<br>Direct link via (a) systematic gene ID (b) RefSeq nucleotide or protein (c) UniProt ID:<br>(a) <a href="http://www.pombase.org/spombe/result/SPBC25H2.13c">http://www.pombase.org/spombe/result/SPBC25H2.13c</a> (DNA pol 2)<br>(b) <a href="http://www.pombase.org/search/ensembl/NM_001021855">http://www.pombase.org/search/ensembl/NM_001021855</a><br>(c) <a href="http://www.pombase.org/search/ensembl/P50528">http://www.pombase.org/search/ensembl/P50528</a>                                                                                                                                                                                                                                                                                                                                                                                                                                                                                                                                                 | (Wood <i>et al.</i> , 2012)           |
| <i>Xenopus laevis</i> ,<br><i>Xenopus tropicalis</i> | Xenbase            | Home page: <a href="http://www.xenbase.org/">http://www.xenbase.org/</a><br>Query via any term, e.g. gene symbol:<br><a href="http://www.xenbase.org/gene/searchGene.do?method=search&amp;searchIn=0&amp;searchType=0&amp;searchValue=TP53">http://www.xenbase.org/gene/searchGene.do?method=search&amp;searchIn=0&amp;searchType=0&amp;searchValue=TP53</a> (p53)<br>Link to Summary page via (a) GenBank (b) RefSeq nucleotide or protein (c) UniProt ID:<br>(a) <a href="http://www.xenbase.org/gene/searchGene.do?method=search&amp;searchIn=0&amp;searchType=0&amp;searchValue=BC045078">http://www.xenbase.org/gene/searchGene.do?method=search&amp;searchIn=0&amp;searchType=0&amp;searchValue=BC045078</a> (Cdk1)<br>(b) <a href="http://www.xenbase.org/gene/searchGene.do?method=search&amp;searchIn=0&amp;searchType=0&amp;searchValue=NM_001030470">http://www.xenbase.org/gene/searchGene.do?method=search&amp;searchIn=0&amp;searchType=0&amp;searchValue=NM_001030470</a> (DNA pol ε)<br>(c) <a href="http://www.xenbase.org/gene/searchGene.do?method=search&amp;searchIn=0&amp;searchType=0&amp;searchValue=P30309">http://www.xenbase.org/gene/searchGene.do?method=search&amp;searchIn=0&amp;searchType=0&amp;searchValue=P30309</a> | (James-Zorn <i>et al.</i> , 2013)     |
| Pathogens                                            | GeneDB             | Home page: <a href="http://www.genedb.org/">http://www.genedb.org/</a><br>Direct link to General Information page, via gene code:<br><a href="http://www.genedb.org/gene/LmjF_11.0110">http://www.genedb.org/gene/LmjF_11.0110</a>                                                                                                                                                                                                                                                                                                                                                                                                                                                                                                                                                                                                                                                                                                                                                                                                                                                                                                                                                                                                                      | (Logan-Klumpler <i>et al.</i> , 2012) |
| Viruses (all)                                        | NCBI Viral Genomes | Home page: <a href="http://www.ncbi.nlm.nih.gov/genomes/VIRUSES/viruses.html">http://www.ncbi.nlm.nih.gov/genomes/VIRUSES/viruses.html</a><br>Direct link to record via GenBank, GI, RefSeq, UniProt ID:<br><a href="http://www.ncbi.nlm.nih.gov/nucleotide/NC_001802.1">http://www.ncbi.nlm.nih.gov/nucleotide/NC_001802.1</a>                                                                                                                                                                                                                                                                                                                                                                                                                                                                                                                                                                                                                                                                                                                                                                                                                                                                                                                         | (Bao <i>et al.</i> , 2004)            |
| Viruses (select human pathogens)                     | ViPR               | Home page: <a href="http://www.viprbrc.org/">http://www.viprbrc.org/</a><br>Direct link to Gene/Protein Details page, via NCBI ID:<br><a href="http://www.viprbrc.org/brc/viprDetails.do?ncbiAccession=AY304488">http://www.viprbrc.org/brc/viprDetails.do?ncbiAccession=AY304488</a>                                                                                                                                                                                                                                                                                                                                                                                                                                                                                                                                                                                                                                                                                                                                                                                                                                                                                                                                                                   | (Pickett <i>et al.</i> , 2012)        |

## Supplemental Table S2

### “Home” databases of sequence-based hits, sequence retrieval and genomic context

| Resource                                                   | Type                                                       | Example web-links                                                                                                                                                                                                                                                                                                                                                                                                                                                                                                                                                                                                                                                                                                                                                                                                                                                                                                                                                                                                                                                                                                                                                                                                                                                                                                                           | Reference                        |
|------------------------------------------------------------|------------------------------------------------------------|---------------------------------------------------------------------------------------------------------------------------------------------------------------------------------------------------------------------------------------------------------------------------------------------------------------------------------------------------------------------------------------------------------------------------------------------------------------------------------------------------------------------------------------------------------------------------------------------------------------------------------------------------------------------------------------------------------------------------------------------------------------------------------------------------------------------------------------------------------------------------------------------------------------------------------------------------------------------------------------------------------------------------------------------------------------------------------------------------------------------------------------------------------------------------------------------------------------------------------------------------------------------------------------------------------------------------------------------|----------------------------------|
| NCBI Gene                                                  | Gene                                                       | Home page: <a href="http://www.ncbi.nlm.nih.gov/gene/">http://www.ncbi.nlm.nih.gov/gene/</a><br>Gene record via NCBI Gene ID:<br><a href="http://www.ncbi.nlm.nih.gov/gene/7157">http://www.ncbi.nlm.nih.gov/gene/7157</a> (human p53)                                                                                                                                                                                                                                                                                                                                                                                                                                                                                                                                                                                                                                                                                                                                                                                                                                                                                                                                                                                                                                                                                                      | (NCBI, 2014)                     |
| NCBI Nucleotide                                            | Nucleic acid<br><i>(all GenBank / EMBL / DDBJ entries)</i> | Home page: <a href="http://www.ncbi.nlm.nih.gov/nucleotide/">http://www.ncbi.nlm.nih.gov/nucleotide/</a><br>Record via (a) RefSeq nucleotide ID (b) GI number:<br>(a) <a href="http://www.ncbi.nlm.nih.gov/nucleotide/NM_007659.3">http://www.ncbi.nlm.nih.gov/nucleotide/NM_007659.3</a> (Cdk1)<br>(b) <a href="http://www.ncbi.nlm.nih.gov/nucleotide/442620637">http://www.ncbi.nlm.nih.gov/nucleotide/442620637</a> (DNA pol ε)<br>Sequence (FASTA format) via (c) RefSeq nucleotide ID (d) GI number:<br>(c) <a href="http://www.ncbi.nlm.nih.gov/nucleotide/NM_001790.4?report=fasta">http://www.ncbi.nlm.nih.gov/nucleotide/NM_001790.4?report=fasta</a><br>(d) <a href="http://www.ncbi.nlm.nih.gov/nucleotide/262399398?report=fasta">http://www.ncbi.nlm.nih.gov/nucleotide/262399398?report=fasta</a>                                                                                                                                                                                                                                                                                                                                                                                                                                                                                                                            | (NCBI, 2014)                     |
| NCBI Protein                                               | Protein<br><i>(includes nr-database entries)</i>           | Home page: <a href="http://www.ncbi.nlm.nih.gov/protein/">http://www.ncbi.nlm.nih.gov/protein/</a><br>Protein record via (a) RefSeq protein (b) GenBank (c) GI number:<br>(a) <a href="http://www.ncbi.nlm.nih.gov/protein/NP_990595">http://www.ncbi.nlm.nih.gov/protein/NP_990595</a> (p53)<br>(b) <a href="http://www.ncbi.nlm.nih.gov/protein/JAA33981">http://www.ncbi.nlm.nih.gov/protein/JAA33981</a> (Cdk1)<br>(c) <a href="http://www.ncbi.nlm.nih.gov/protein/332190145">http://www.ncbi.nlm.nih.gov/protein/332190145</a> (DNA pol ε)<br>Amino acid sequence (FASTA format) via (d) RefSeq protein (e) GenBank (f) GI-number:<br>(d) <a href="http://www.ncbi.nlm.nih.gov/protein/NP_082106.2?report=fasta">http://www.ncbi.nlm.nih.gov/protein/NP_082106.2?report=fasta</a><br>(e) <a href="http://www.ncbi.nlm.nih.gov/protein/AAD00168.1?report=fasta">http://www.ncbi.nlm.nih.gov/protein/AAD00168.1?report=fasta</a><br>(f) <a href="http://www.ncbi.nlm.nih.gov/protein/147904804?report=fasta">http://www.ncbi.nlm.nih.gov/protein/147904804?report=fasta</a>                                                                                                                                                                                                                                                             | (NCBI, 2014)                     |
| UniProt                                                    | Protein                                                    | Home page: <a href="http://www.uniprot.org/uniprot/">http://www.uniprot.org/uniprot/</a><br>Protein record via UniProt ID: <a href="http://www.uniprot.org/uniprot/Q90X16">http://www.uniprot.org/uniprot/Q90X16</a><br>Amino acid sequence (FASTA format) via UniProt ID:<br><a href="http://www.uniprot.org/uniprot/P06493.fasta">http://www.uniprot.org/uniprot/P06493.fasta</a>                                                                                                                                                                                                                                                                                                                                                                                                                                                                                                                                                                                                                                                                                                                                                                                                                                                                                                                                                         | (UniProt, 2014)                  |
| Ensembl                                                    | Genomic DNA, transcripts, protein                          | Home page: <a href="http://www.ensembl.org/">http://www.ensembl.org/</a><br>Gene record via Ensembl gene ID:<br><a href="http://www.ensembl.org/Gene/Summary?g=ENSLACG00000014014">http://www.ensembl.org/Gene/Summary?g=ENSLACG00000014014</a> (p53)<br>Transcript record via <i>species name</i> plus Ensembl transcript ID:<br><a href="http://www.ensembl.org/Ciona_intestinalis/Transcript/Summary?t=ENSCING0000005978">http://www.ensembl.org/Ciona_intestinalis/Transcript/Summary?t=ENSCING0000005978</a> (Cdk1)<br>Protein record via <i>species name</i> plus Ensembl protein ID:<br><a href="http://www.ensembl.org/Pongo_abelii/Transcript/ProteinSummary?db=core;t=ENNSPPYP00000005860">http://www.ensembl.org/Pongo_abelii/Transcript/ProteinSummary?db=core;t=ENNSPPYP00000005860</a> (DNA pol ε)                                                                                                                                                                                                                                                                                                                                                                                                                                                                                                                            | (Flicek <i>et al.</i> , 2014)    |
| Gene Indices                                               | Nucleic acid                                               | Home page: <a href="http://compbio.dfci.harvard.edu/tgi/">http://compbio.dfci.harvard.edu/tgi/</a><br>Report page (includes sequence) via <i>organism</i> plus TC code:<br><a href="http://compbio.dfci.harvard.edu/cgi-bin/tgi/tc_report.pl?gudb=Frog&amp;tc=TC417826">http://compbio.dfci.harvard.edu/cgi-bin/tgi/tc_report.pl?gudb=Frog&amp;tc=TC417826</a> (p53)                                                                                                                                                                                                                                                                                                                                                                                                                                                                                                                                                                                                                                                                                                                                                                                                                                                                                                                                                                        | (Lee <i>et al.</i> , 2005)       |
| IPI                                                        | Protein                                                    | <i>IPI was discontinued in 2011, with entries integrated into UniProt. IPI cross-references in UniProt were removed in 2014; some remain in UniParc.</i><br>Query UniParc via IPI ID: <a href="http://www.uniprot.org/uniparc/?query=IPI00025087">http://www.uniprot.org/uniparc/?query=IPI00025087</a>                                                                                                                                                                                                                                                                                                                                                                                                                                                                                                                                                                                                                                                                                                                                                                                                                                                                                                                                                                                                                                     | (Kersey <i>et al.</i> , 2004)    |
| <b>Genomic context</b>                                     |                                                            |                                                                                                                                                                                                                                                                                                                                                                                                                                                                                                                                                                                                                                                                                                                                                                                                                                                                                                                                                                                                                                                                                                                                                                                                                                                                                                                                             |                                  |
| UCSC Genome Browser                                        | Genomic loci and sequences                                 | Home page: <a href="http://genome.ucsc.edu/">http://genome.ucsc.edu/</a><br>Query via <i>species name</i> and (a) gene symbol (b) RefSeq nucleotide (c) RefSeq protein (d) UniProt ID:<br>(a) <a href="http://genome.ucsc.edu/cgi-bin/hgTracks?org=X.tropicalis&amp;position=tp53">http://genome.ucsc.edu/cgi-bin/hgTracks?org=X.tropicalis&amp;position=tp53</a><br>(b) <a href="http://genome.ucsc.edu/cgi-bin/hgTracks?hgHubConnect.destUrl=&amp;org=Mouse&amp;position=NM_007659.3">http://genome.ucsc.edu/cgi-bin/hgTracks?hgHubConnect.destUrl=&amp;org=Mouse&amp;position=NM_007659.3</a> (Cdk1)<br>(c) <a href="http://genome.ucsc.edu/cgi-bin/hgTracks?hgHubConnect.destUrl=&amp;org=Rat&amp;position=NP_001100622.2">http://genome.ucsc.edu/cgi-bin/hgTracks?hgHubConnect.destUrl=&amp;org=Rat&amp;position=NP_001100622.2</a> (DNA pol ε)<br>(d) <a href="http://genome.ucsc.edu/cgi-bin/hgTracks?hgHubConnect.destUrl=&amp;org=Human&amp;position=P30307">http://genome.ucsc.edu/cgi-bin/hgTracks?hgHubConnect.destUrl=&amp;org=Human&amp;position=P30307</a><br>Direct link to detailed locus view via (human) chromosomal coordinates:<br><a href="http://genome.ucsc.edu/cgi-bin/hgTracks?db=hg19&amp;position=chr19:7151995-7294011">http://genome.ucsc.edu/cgi-bin/hgTracks?db=hg19&amp;position=chr19:7151995-7294011</a> | (Karolchik <i>et al.</i> , 2014) |
| Ensembl                                                    | Genomic DNA, transcripts, protein                          | Home page: <a href="http://www.ensembl.org/">http://www.ensembl.org/</a><br>Direct link to gene page (showing chromosomal location) via <i>full or abbreviated species name</i> plus (a) gene symbol (b) Ensembl gene ID (c) RefSeq nucleotide (d) RefSeq protein (e) UniProt ID:<br>(a) <a href="http://www.ensembl.org/Homo_sapiens/Gene/Summary?g=TP53">http://www.ensembl.org/Homo_sapiens/Gene/Summary?g=TP53</a> (p53)<br>(b) <a href="http://www.ensembl.org/G_gorilla/Gene/Summary?g=ENSGGOG00000013311">http://www.ensembl.org/G_gorilla/Gene/Summary?g=ENSGGOG00000013311</a> (Cdk1)<br>(c) <a href="http://www.ensembl.org/O_anatinus/Gene/Summary?g=XM_001514722">http://www.ensembl.org/O_anatinus/Gene/Summary?g=XM_001514722</a> (DNA pol E4)<br>(d) <a href="http://www.ensembl.org/D_terio/Gene/Summary?g=NP_998343">http://www.ensembl.org/D_terio/Gene/Summary?g=NP_998343</a><br>(e) <a href="http://www.ensembl.org/O_cuniculus/Gene/Summary?g=G1SRF6">http://www.ensembl.org/O_cuniculus/Gene/Summary?g=G1SRF6</a><br>Link to “Region in Detail” view, via <i>species</i> and chromosomal coordinates:<br><a href="http://www.ensembl.org/mouse/Location/View?r=7:135689788-135716379">http://www.ensembl.org/mouse/Location/View?r=7:135689788-135716379</a>                                                         | (Flicek <i>et al.</i> , 2014)    |
| <i>A user’s guide to the human genome – article series</i> |                                                            | <i>Nature Genetics</i> (2002) – free access:<br><a href="http://www.nature.com/ng/journal/v32/n1s/index.html">http://www.nature.com/ng/journal/v32/n1s/index.html</a>                                                                                                                                                                                                                                                                                                                                                                                                                                                                                                                                                                                                                                                                                                                                                                                                                                                                                                                                                                                                                                                                                                                                                                       | (Wolfsberg <i>et al.</i> , 2002) |

## Supplemental Table S3

### Ensembl Genomes databases (Kersey *et al.*, 2014)

General home page: <http://ensemblgenomes.org/>

| Database                           | Example species                                                                                                                                            | Example web-links                                                                                                                                                                                                                                                                                                                                                                                                                                                                                                                                                                                                                                                                                                                                                                                                                                                                                                                                                                                                                                                                                                                                                                                                                                                                                                                                                                                                                                                                                                                                                                                                                                                                                                                                                                                                                                                                                                                                                                                                                                                                                 |
|------------------------------------|------------------------------------------------------------------------------------------------------------------------------------------------------------|---------------------------------------------------------------------------------------------------------------------------------------------------------------------------------------------------------------------------------------------------------------------------------------------------------------------------------------------------------------------------------------------------------------------------------------------------------------------------------------------------------------------------------------------------------------------------------------------------------------------------------------------------------------------------------------------------------------------------------------------------------------------------------------------------------------------------------------------------------------------------------------------------------------------------------------------------------------------------------------------------------------------------------------------------------------------------------------------------------------------------------------------------------------------------------------------------------------------------------------------------------------------------------------------------------------------------------------------------------------------------------------------------------------------------------------------------------------------------------------------------------------------------------------------------------------------------------------------------------------------------------------------------------------------------------------------------------------------------------------------------------------------------------------------------------------------------------------------------------------------------------------------------------------------------------------------------------------------------------------------------------------------------------------------------------------------------------------------------|
| Ensembl Bacteria                   | <i>Escherichia coli</i>                                                                                                                                    | Home page: <a href="http://bacteria.ensembl.org/">http://bacteria.ensembl.org/</a><br>Query across all bacterial species, via any search term:<br><a href="http://bacteria.ensembl.org/Multi/Search/Results?species=all;q=GroEL">http://bacteria.ensembl.org/Multi/Search/Results?species=all;q=GroEL</a><br>Query (across all strains) via species name plus gene name:<br><a href="http://bacteria.ensembl.org/Search/Results?species=Escherichia-coli;q=dnaA">http://bacteria.ensembl.org/Search/Results?species=Escherichia-coli;q=dnaA</a> (DNA pol)<br>Query via (a) gene code (b) gene ID (c) UniProt ID:<br>(a) <a href="http://bacteria.ensembl.org/Search/Results?q=BSU29180">http://bacteria.ensembl.org/Search/Results?q=BSU29180</a><br>(b) <a href="http://bacteria.ensembl.org/Search/Results?q=EC1011_4754">http://bacteria.ensembl.org/Search/Results?q=EC1011_4754</a><br>(c) <a href="http://bacteria.ensembl.org/Search/Results?q=P03004">http://bacteria.ensembl.org/Search/Results?q=P03004</a><br>Direct link via species name and strain plus gene ID:<br><a href="http://bacteria.ensembl.org/Escherichia_coli_101_1/Gene/Summary?g=EC1011_4754">http://bacteria.ensembl.org/Escherichia_coli_101_1/Gene/Summary?g=EC1011_4754</a>                                                                                                                                                                                                                                                                                                                                                                                                                                                                                                                                                                                                                                                                                                                                                                                                                                       |
| Ensembl Fungi                      | * <i>Saccharomyces cerevisiae</i> (budding yeast),<br><br>† <i>Schizosaccharomyces pombe</i> (fission yeast)                                               | Home page: <a href="http://fungi.ensembl.org/">http://fungi.ensembl.org/</a><br>Query across all fungal species, via any search term:<br><a href="http://fungi.ensembl.org/Multi/Search/Results?species=all;q=Dam1">http://fungi.ensembl.org/Multi/Search/Results?species=all;q=Dam1</a><br>Direct link to gene page via species name plus (a) gene name (b) systematic name (c) RefSeq nucleotide (d) RefSeq protein (e) UniProt ID:<br>(a*) <a href="http://fungi.ensembl.org/S_cerevisiae/Gene/Summary?g=CDC28">http://fungi.ensembl.org/S_cerevisiae/Gene/Summary?g=CDC28</a> (Cdk1)<br>(a†) <a href="http://fungi.ensembl.org/S_pombe/Gene/Summary?g=cdc2">http://fungi.ensembl.org/S_pombe/Gene/Summary?g=cdc2</a> (Cdk1)<br>(b*) <a href="http://fungi.ensembl.org/S_cerevisiae/Gene/Summary?g=YNL262W">http://fungi.ensembl.org/S_cerevisiae/Gene/Summary?g=YNL262W</a> (DNA pol 2)<br>(b†) <a href="http://fungi.ensembl.org/S_pombe/Gene/Summary?g=SPBC25H2.13c">http://fungi.ensembl.org/S_pombe/Gene/Summary?g=SPBC25H2.13c</a> (DNA pol 2)<br>(c) <a href="http://fungi.ensembl.org/S_pombe/Gene/Summary?g=NM_001021079">http://fungi.ensembl.org/S_pombe/Gene/Summary?g=NM_001021079</a><br>(d) <a href="http://fungi.ensembl.org/S_pombe/Gene/Summary?g=NP_593305">http://fungi.ensembl.org/S_pombe/Gene/Summary?g=NP_593305</a><br>(e) <a href="http://fungi.ensembl.org/S_pombe/Gene/Summary?g=P0CF96">http://fungi.ensembl.org/S_pombe/Gene/Summary?g=P0CF96</a>                                                                                                                                                                                                                                                                                                                                                                                                                                                                                                                                                                                                                |
| Ensembl Plants                     | * <i>Arabidopsis thaliana</i> (thale cress),<br><br>† <i>Oryza sativa</i> (rice)                                                                           | Home page: <a href="http://plants.ensembl.org/">http://plants.ensembl.org/</a><br>Query across all plant species, via any search term:<br><a href="http://plants.ensembl.org/Multi/Search/Results?species=all;q=GMI1">http://plants.ensembl.org/Multi/Search/Results?species=all;q=GMI1</a><br>Direct link to gene page via species name plus (a) gene name (b) gene code (c) locus code (d) RefSeq nucleotide (e) RefSeq protein (f) UniProt ID:<br>(a) <a href="http://plants.ensembl.org/Arabidopsis_thaliana/Gene/Summary?g=cdc2">http://plants.ensembl.org/Arabidopsis_thaliana/Gene/Summary?g=cdc2</a><br>(b*) <a href="http://plants.ensembl.org/Arabidopsis_thaliana/Gene/Summary?g=AT1G08260">http://plants.ensembl.org/Arabidopsis_thaliana/Gene/Summary?g=AT1G08260</a> (DNA pol e)<br>(b†) <a href="http://plants.ensembl.org/Oryza_sativa/Gene/Summary?g=P0623A10.22">http://plants.ensembl.org/Oryza_sativa/Gene/Summary?g=P0623A10.22</a><br>(c) <a href="http://plants.ensembl.org/Oryza_sativa/Gene/Summary?g=OS06G0687600">http://plants.ensembl.org/Oryza_sativa/Gene/Summary?g=OS06G0687600</a> (Cdk)<br>(d) <a href="http://plants.ensembl.org/Arabidopsis_thaliana/Gene/Summary?g=NM_122334">http://plants.ensembl.org/Arabidopsis_thaliana/Gene/Summary?g=NM_122334</a><br>(e) <a href="http://plants.ensembl.org/Arabidopsis_thaliana/Gene/Summary?g=NP_197816">http://plants.ensembl.org/Arabidopsis_thaliana/Gene/Summary?g=NP_197816</a><br>(f) <a href="http://plants.ensembl.org/Oryza_sativa/Gene/Summary?g=Q7GD79">http://plants.ensembl.org/Oryza_sativa/Gene/Summary?g=Q7GD79</a>                                                                                                                                                                                                                                                                                                                                                                                                                                                                                |
| Ensembl Protists                   | <i>Dictyostelium discoideum</i> (slime mold),<br><br><i>Plasmodium falciparum</i> (malaria parasite),<br><br><i>Leishmania major</i> (Leishmania pathogen) | Home page: <a href="http://protists.ensembl.org/">http://protists.ensembl.org/</a><br>Query across all protists, via any search term:<br><a href="http://protists.ensembl.org/Multi/Search/Results?species=all;q=cdc2">http://protists.ensembl.org/Multi/Search/Results?species=all;q=cdc2</a><br>Direct link to gene page via species plus (a) gene symbol (b) gene code (c) RefSeq nucleotide (d) GenBank (e) UniProt ID:<br>(a) <a href="http://protists.ensembl.org/Dictyostelium_discoideum/Gene/Summary?g=Cdk1">http://protists.ensembl.org/Dictyostelium_discoideum/Gene/Summary?g=Cdk1</a><br>(b) <a href="http://protists.ensembl.org/Plasmodium_falciparum/Gene/Summary?g=PF14_0234">http://protists.ensembl.org/Plasmodium_falciparum/Gene/Summary?g=PF14_0234</a> (DNA polymerase)<br>(b) <a href="http://protists.ensembl.org/Leishmania_major/Gene/Summary?g=LmjF.11.0110">http://protists.ensembl.org/Leishmania_major/Gene/Summary?g=LmjF.11.0110</a><br>(c) <a href="http://protists.ensembl.org/Dictyostelium_discoideum/Gene/Summary?g=XM_630033">http://protists.ensembl.org/Dictyostelium_discoideum/Gene/Summary?g=XM_630033</a><br>(d) <a href="http://protists.ensembl.org/Dictyostelium_discoideum/Gene/Summary?g=M80808">http://protists.ensembl.org/Dictyostelium_discoideum/Gene/Summary?g=M80808</a><br>(e) <a href="http://protists.ensembl.org/Dictyostelium_discoideum/Gene/Summary?g=P33519">http://protists.ensembl.org/Dictyostelium_discoideum/Gene/Summary?g=P33519</a>                                                                                                                                                                                                                                                                                                                                                                                                                                                                                                                                                                                      |
| Ensembl Metazoa<br>(invertebrates) | <i>Drosophila melanogaster</i> (fruit fly),<br><br><i>Caenorhabditis elegans</i> (nematode worm)                                                           | Home page: <a href="http://metazoa.ensembl.org/">http://metazoa.ensembl.org/</a><br>Query across all invertebrate metazoa, via any search term:<br><a href="http://metazoa.ensembl.org/Multi/Search/Results?species=all;q=p53">http://metazoa.ensembl.org/Multi/Search/Results?species=all;q=p53</a><br>Query via species plus descriptive name:<br><a href="http://metazoa.ensembl.org/Drosophila_melanogaster/Search/Results?q=string">http://metazoa.ensembl.org/Drosophila_melanogaster/Search/Results?q=string</a><br>Link to gene page via species plus (a) gene name/symbol (b) gene code (c) FlyBase ID (d) WormBase ID (e) RefSeq nucleotide (f) RefSeq protein (g) GenBank protein (h) UniProt ID:<br>(a) <a href="http://metazoa.ensembl.org/D_melanogaster/Gene/Summary?g=cdc2">http://metazoa.ensembl.org/D_melanogaster/Gene/Summary?g=cdc2</a> (Cdk1)<br>(a) <a href="http://metazoa.ensembl.org/C_elegans/Gene/Summary?g=cdk-1">http://metazoa.ensembl.org/C_elegans/Gene/Summary?g=cdk-1</a> (Cdk1)<br>(b) <a href="http://metazoa.ensembl.org/C_elegans/Gene/Summary?g=F08B4.5">http://metazoa.ensembl.org/C_elegans/Gene/Summary?g=F08B4.5</a> (DNA pol)<br>(c) <a href="http://metazoa.ensembl.org/D_melanogaster/Gene/Summary?g=FBgn0004106">http://metazoa.ensembl.org/D_melanogaster/Gene/Summary?g=FBgn0004106</a><br>(d) <a href="http://metazoa.ensembl.org/C_elegans/Gene/Summary?g=WBGene00000423">http://metazoa.ensembl.org/C_elegans/Gene/Summary?g=WBGene00000423</a><br>(e) <a href="http://metazoa.ensembl.org/C_elegans/Gene/Summary?g=NM_060013">http://metazoa.ensembl.org/C_elegans/Gene/Summary?g=NM_060013</a><br>(f) <a href="http://metazoa.ensembl.org/C_elegans/Gene/Summary?g=NP_492414">http://metazoa.ensembl.org/C_elegans/Gene/Summary?g=NP_492414</a><br>(g) <a href="http://metazoa.ensembl.org/C_elegans/Gene/Summary?g=AAQ17186">http://metazoa.ensembl.org/C_elegans/Gene/Summary?g=AAQ17186</a><br>(h) <a href="http://metazoa.ensembl.org/C_elegans/Gene/Summary?g=P91870">http://metazoa.ensembl.org/C_elegans/Gene/Summary?g=P91870</a> |

## Supplemental Table S4

### Database resources for extracting information from biomedical literature, or providing summary information about gene or protein function

| Resource                                               | Example web-links                                                                                                                                                                                                                                                                                                                                                                                                                                                                                                                                                                                                                                                                                                                                                                                                                                                                                                                                                                                                                                                                                                                                                                                                                                                                                                                                                                                                                                                                                                                                                                                                                                                                                                                                                                                             | Reference                        |
|--------------------------------------------------------|---------------------------------------------------------------------------------------------------------------------------------------------------------------------------------------------------------------------------------------------------------------------------------------------------------------------------------------------------------------------------------------------------------------------------------------------------------------------------------------------------------------------------------------------------------------------------------------------------------------------------------------------------------------------------------------------------------------------------------------------------------------------------------------------------------------------------------------------------------------------------------------------------------------------------------------------------------------------------------------------------------------------------------------------------------------------------------------------------------------------------------------------------------------------------------------------------------------------------------------------------------------------------------------------------------------------------------------------------------------------------------------------------------------------------------------------------------------------------------------------------------------------------------------------------------------------------------------------------------------------------------------------------------------------------------------------------------------------------------------------------------------------------------------------------------------|----------------------------------|
| <i>Literature searching / information retrieval</i>    |                                                                                                                                                                                                                                                                                                                                                                                                                                                                                                                                                                                                                                                                                                                                                                                                                                                                                                                                                                                                                                                                                                                                                                                                                                                                                                                                                                                                                                                                                                                                                                                                                                                                                                                                                                                                               |                                  |
| PubMed                                                 | Home page: <a href="http://www.ncbi.nlm.nih.gov/pubmed/">http://www.ncbi.nlm.nih.gov/pubmed/</a><br>Query via any term: <a href="http://www.ncbi.nlm.nih.gov/pubmed?term=p53">http://www.ncbi.nlm.nih.gov/pubmed?term=p53</a>                                                                                                                                                                                                                                                                                                                                                                                                                                                                                                                                                                                                                                                                                                                                                                                                                                                                                                                                                                                                                                                                                                                                                                                                                                                                                                                                                                                                                                                                                                                                                                                 | (NCBI, 2014)                     |
| Google Scholar                                         | Home page: <a href="http://scholar.google.com/">http://scholar.google.com/</a><br>Query via any term: <a href="http://scholar.google.com/scholar?q=p53">http://scholar.google.com/scholar?q=p53</a>                                                                                                                                                                                                                                                                                                                                                                                                                                                                                                                                                                                                                                                                                                                                                                                                                                                                                                                                                                                                                                                                                                                                                                                                                                                                                                                                                                                                                                                                                                                                                                                                           | (Boeker <i>et al.</i> , 2013)    |
| Scirus                                                 | Query via any term: <a href="http://www.scirus.com/srsapp/search?q=p53">http://www.scirus.com/srsapp/search?q=p53</a>                                                                                                                                                                                                                                                                                                                                                                                                                                                                                                                                                                                                                                                                                                                                                                                                                                                                                                                                                                                                                                                                                                                                                                                                                                                                                                                                                                                                                                                                                                                                                                                                                                                                                         | (Giustini and Barsky, 2005)      |
| iHOP                                                   | Home page: <a href="http://www.ihop-net.org/UniPub/iHOP/">http://www.ihop-net.org/UniPub/iHOP/</a><br>Query via any term (e.g. gene symbol):<br><a href="http://www.ihop-net.org/UniPub/iHOP/index.html?search=p53">http://www.ihop-net.org/UniPub/iHOP/index.html?search=p53</a>                                                                                                                                                                                                                                                                                                                                                                                                                                                                                                                                                                                                                                                                                                                                                                                                                                                                                                                                                                                                                                                                                                                                                                                                                                                                                                                                                                                                                                                                                                                             | (Fernandez <i>et al.</i> , 2007) |
| Textpresso<br><br><i>Note: need to click "Search!"</i> | Home page: <a href="http://www.textpresso.org/">http://www.textpresso.org/</a><br>Query via any term for (a) <i>C. elegans</i> (b) <i>Drosophila</i> (c) <i>Arabidopsis</i> (d) <i>Dictyostelium</i> (e) zebrafish (f) <i>S. cerevisiae</i> (g) <i>Xenopus</i> (h) mouse (i) rat:<br>(a) <a href="http://www.textpresso.org/cgi-bin/celegans/search?searchstring=cdk-1">http://www.textpresso.org/cgi-bin/celegans/search?searchstring=cdk-1</a><br>(b) <a href="http://www.textpresso.org/cgi-bin/fly/search?searchstring=stg">http://www.textpresso.org/cgi-bin/fly/search?searchstring=stg</a><br>(c) <a href="http://www.textpresso.org/cgi-bin/arabidopsis/search?searchstring=GMI1">http://www.textpresso.org/cgi-bin/arabidopsis/search?searchstring=GMI1</a><br>(d) <a href="http://www.textpresso.org/cgi-bin/dicty/search?searchstring=dimB">http://www.textpresso.org/cgi-bin/dicty/search?searchstring=dimB</a><br>(e) <a href="http://www.textpresso.org/cgi-bin/zebrafish25/search?searchstring=plk1">http://www.textpresso.org/cgi-bin/zebrafish25/search?searchstring=plk1</a><br>(f) <a href="http://textpresso.yeastgenome.org/cgi-bin/textpresso/search?searchstring=IPL1">http://textpresso.yeastgenome.org/cgi-bin/textpresso/search?searchstring=IPL1</a><br>(g) <a href="http://www.xenbase.org/cgi-bin/textpresso/xenopus/search?searchstring=Cdc25">http://www.xenbase.org/cgi-bin/textpresso/xenopus/search?searchstring=Cdc25</a><br>(h) <a href="http://www.textpresso.org/cgi-bin/mouse/search?searchstring=Apc">http://www.textpresso.org/cgi-bin/mouse/search?searchstring=Apc</a><br>(i) <a href="http://www.textpresso.org/cgi-bin/rat/search?searchstring=Cdk2">http://www.textpresso.org/cgi-bin/rat/search?searchstring=Cdk2</a>                                          | (Müller <i>et al.</i> , 2004)    |
| <i>Summary information</i>                             |                                                                                                                                                                                                                                                                                                                                                                                                                                                                                                                                                                                                                                                                                                                                                                                                                                                                                                                                                                                                                                                                                                                                                                                                                                                                                                                                                                                                                                                                                                                                                                                                                                                                                                                                                                                                               |                                  |
| NCBI Gene                                              | Home page: <a href="http://www.ncbi.nlm.nih.gov/gene/">http://www.ncbi.nlm.nih.gov/gene/</a><br>Query via text term e.g. gene symbol:<br><a href="http://www.ncbi.nlm.nih.gov/gene?term=TP53">http://www.ncbi.nlm.nih.gov/gene?term=TP53</a><br>Direct link to gene summary via (a) NCBI gene (b) Ensembl gene (c) Ensembl transcript (d) nucleotide GI number (e) Ensembl protein (f) RefSeq nucleotide or protein (g) GenBank protein (h) UniProt ID:<br>(a) <a href="http://www.ncbi.nlm.nih.gov/gene/983#summary">http://www.ncbi.nlm.nih.gov/gene/983#summary</a><br>(b) <a href="http://www.ncbi.nlm.nih.gov/gene?term=ENSG00000156970#summary">http://www.ncbi.nlm.nih.gov/gene?term=ENSG00000156970#summary</a><br>(c) <a href="http://www.ncbi.nlm.nih.gov/gene?term=ENST00000296509#summary">http://www.ncbi.nlm.nih.gov/gene?term=ENST00000296509#summary</a><br>(d) <a href="http://www.ncbi.nlm.nih.gov/gene?term=4050083[Nucleotide+UID]#summary">http://www.ncbi.nlm.nih.gov/gene?term=4050083[Nucleotide+UID]#summary</a><br>(e) <a href="http://www.ncbi.nlm.nih.gov/gene?term=ENSP00000287598#summary">http://www.ncbi.nlm.nih.gov/gene?term=ENSP00000287598#summary</a><br>(f) <a href="http://www.ncbi.nlm.nih.gov/gene?term=NM_007194#summary">http://www.ncbi.nlm.nih.gov/gene?term=NM_007194#summary</a><br>(g) <a href="http://www.ncbi.nlm.nih.gov/gene/?term=AAC51736#summary">http://www.ncbi.nlm.nih.gov/gene/?term=AAC51736#summary</a><br>(h) <a href="http://www.ncbi.nlm.nih.gov/gene/?term=P06493[Nucleotide%2FProtein+Accession]#summary">http://www.ncbi.nlm.nih.gov/gene/?term=P06493[Nucleotide%2FProtein+Accession]#summary</a>                                                                                                                                         | (Maglott <i>et al.</i> , 2011)   |
| UniProt                                                | Home page: <a href="http://www.uniprot.org/">http://www.uniprot.org/</a><br>Query via any term: <a href="http://www.uniprot.org/uniprot/?query=helicase">http://www.uniprot.org/uniprot/?query=helicase</a><br>Query via species + gene symbol:<br><a homo+sapiens"+gene:tp53"="" href="http://www.uniprot.org/uniprot/?query=organism:">http://www.uniprot.org/uniprot/?query=organism:"homo+sapiens"+gene:TP53</a><br>Query via species + gene symbol, showing only reviewed (Swiss-Prot) entries:<br><a homo+sapiens"+gene:tp53"="" href="http://www.uniprot.org/uniprot/?query=reviewed:yes+organism:">http://www.uniprot.org/uniprot/?query=reviewed:yes+organism:"homo+sapiens"+gene:TP53</a><br>Link to General Annotation via UniProt ID:<br><a href="http://www.uniprot.org/uniprot/P04637#section_comments">http://www.uniprot.org/uniprot/P04637#section_comments</a> (p53)                                                                                                                                                                                                                                                                                                                                                                                                                                                                                                                                                                                                                                                                                                                                                                                                                                                                                                                        | (UniProt, 2014)                  |
| Online Mendelian Inheritance in Man (OMIM)             | Home page: <a href="http://omim.org/">http://omim.org/</a><br>Query via (a) any text term (b) gene symbol:<br>(a) <a href="http://omim.org/search?search=Bloom">http://omim.org/search?search=Bloom</a><br>(b) <a href="http://omim.org/search?search=approved_gene_symbol:TP53">http://omim.org/search?search=approved_gene_symbol:TP53</a> (p53)<br>Query via human IDs: (c) NCBI gene (d) Ensembl gene (e) Ensembl transcript (f) NCBI nucleotide GI number (g) UniProt ID:<br>(c) <a href="http://omim.org/search?search=gene_id:983">http://omim.org/search?search=gene_id:983</a> (Cdk1)<br>(d) <a href="http://omim.org/search?search=ensembl_id:ENSG00000177084">http://omim.org/search?search=ensembl_id:ENSG00000177084</a> (DNA pol ε)<br>(e) <a href="http://omim.org/search?search=ensembl_id:ENST00000380502">http://omim.org/search?search=ensembl_id:ENST00000380502</a><br>(f) <a href="http://omim.org/search?search=ncbi_reference_sequence:345525417">http://omim.org/search?search=ncbi_reference_sequence:345525417</a><br>(g) <a href="http://omim.org/search?search=swiss_prot_id:O96017">http://omim.org/search?search=swiss_prot_id:O96017</a><br>Query via non-human gene IDs: (h) mouse (i) zebrafish (j) <i>C. elegans</i> (k) <i>Drosophila</i> :<br>(h) <a href="http://omim.org/search?search=mgi_id:MGI:88351">http://omim.org/search?search=mgi_id:MGI:88351</a><br>(i) <a href="http://omim.org/search?search=zfin_id:ZDB-GENE-010320-1">http://omim.org/search?search=zfin_id:ZDB-GENE-010320-1</a><br>(j) <a href="http://omim.org/search?search=wormbase_id:WBGene00000405">http://omim.org/search?search=wormbase_id:WBGene00000405</a><br>(k) <a href="http://omim.org/search?search=flybase_id:FBgn0004106">http://omim.org/search?search=flybase_id:FBgn0004106</a> | (Amberger <i>et al.</i> , 2011)  |
| Wikipedia                                              | Home page: <a href="http://en.wikipedia.org/">http://en.wikipedia.org/</a><br>Direct link to page (where available) via gene symbol:<br><a href="http://en.wikipedia.org/wiki/TP53">http://en.wikipedia.org/wiki/TP53</a>                                                                                                                                                                                                                                                                                                                                                                                                                                                                                                                                                                                                                                                                                                                                                                                                                                                                                                                                                                                                                                                                                                                                                                                                                                                                                                                                                                                                                                                                                                                                                                                     | (Good <i>et al.</i> , 2012)      |



## Supplemental Table S5

### Database resources providing ontology terms to describe gene or protein function

| Resource                                                                                                                                                                                     | Example web-links                                                                                                                                                                                                                                                                                                                                                                                                                                                                                                                                                                                                                                                                                                                                                                                                                                                                                                                                                                                                                                                                                                                                                                                                                                                                                                                                                                                                                                                                                                                                                                                                                                                                              | Reference                      |
|----------------------------------------------------------------------------------------------------------------------------------------------------------------------------------------------|------------------------------------------------------------------------------------------------------------------------------------------------------------------------------------------------------------------------------------------------------------------------------------------------------------------------------------------------------------------------------------------------------------------------------------------------------------------------------------------------------------------------------------------------------------------------------------------------------------------------------------------------------------------------------------------------------------------------------------------------------------------------------------------------------------------------------------------------------------------------------------------------------------------------------------------------------------------------------------------------------------------------------------------------------------------------------------------------------------------------------------------------------------------------------------------------------------------------------------------------------------------------------------------------------------------------------------------------------------------------------------------------------------------------------------------------------------------------------------------------------------------------------------------------------------------------------------------------------------------------------------------------------------------------------------------------|--------------------------------|
| Gene Ontology Project                                                                                                                                                                        | Home page: <a href="http://www.geneontology.org/">http://www.geneontology.org/</a>                                                                                                                                                                                                                                                                                                                                                                                                                                                                                                                                                                                                                                                                                                                                                                                                                                                                                                                                                                                                                                                                                                                                                                                                                                                                                                                                                                                                                                                                                                                                                                                                             | (Blake, 2013)                  |
| Ensembl                                                                                                                                                                                      | Example GO outputs, via <a href="#">species name</a> and Ensembl transcript ID:<br>Example GO table:<br><a href="http://www.ensembl.org/Homo_sapiens/Transcript/Ontology/Table?t=ENST00000420246">http://www.ensembl.org/Homo_sapiens/Transcript/Ontology/Table?t=ENST00000420246</a><br>Example GO graph:<br><a href="http://www.ensembl.org/Homo_sapiens/Transcript/Ontology/Image?t=ENST00000420246">http://www.ensembl.org/Homo_sapiens/Transcript/Ontology/Image?t=ENST00000420246</a>                                                                                                                                                                                                                                                                                                                                                                                                                                                                                                                                                                                                                                                                                                                                                                                                                                                                                                                                                                                                                                                                                                                                                                                                    | (Flicek <i>et al.</i> , 2014)  |
| QuickGO                                                                                                                                                                                      | Home page: <a href="http://www.ebi.ac.uk/QuickGO/">http://www.ebi.ac.uk/QuickGO/</a><br>Query via (a) text term, e.g. gene symbol (b) Ensembl gene (c) Ensembl transcript (d) Ensembl protein ID:<br>(a) <a href="http://www.ebi.ac.uk/QuickGO/GSearch?q=TP53">http://www.ebi.ac.uk/QuickGO/GSearch?q=TP53</a> (p53)<br>(b) <a href="http://www.ebi.ac.uk/QuickGO/GSearch?q=ENSG00000170312">http://www.ebi.ac.uk/QuickGO/GSearch?q=ENSG00000170312</a> (Cdk1)<br>(c) <a href="http://www.ebi.ac.uk/QuickGO/GSearch?q=ENST00000320574">http://www.ebi.ac.uk/QuickGO/GSearch?q=ENST00000320574</a> (DNA pol ε)<br>(d) <a href="http://www.ebi.ac.uk/QuickGO/GSearch?q=ENSP00000422936">http://www.ebi.ac.uk/QuickGO/GSearch?q=ENSP00000422936</a><br>Query via species-specific gene IDs: (e) mouse (f) <i>Drosophila</i> (g) <i>C. elegans</i> (h) zebrafish (i) <i>Dictyostelium</i> :<br>(e) <a href="http://www.ebi.ac.uk/QuickGO/GSearch?q=MGI:88351">http://www.ebi.ac.uk/QuickGO/GSearch?q=MGI:88351</a><br>(f) <a href="http://www.ebi.ac.uk/QuickGO/GSearch?q=FBgn0000147">http://www.ebi.ac.uk/QuickGO/GSearch?q=FBgn0000147</a><br>(g) <a href="http://www.ebi.ac.uk/QuickGO/GSearch?q=WBGene00000405">http://www.ebi.ac.uk/QuickGO/GSearch?q=WBGene00000405</a><br>(h) <a href="http://www.ebi.ac.uk/QuickGO/GSearch?q=ZDB-GENE-010320-1">http://www.ebi.ac.uk/QuickGO/GSearch?q=ZDB-GENE-010320-1</a><br>(i) <a href="http://www.ebi.ac.uk/QuickGO/GSearch?q=DDB_G0272813">http://www.ebi.ac.uk/QuickGO/GSearch?q=DDB_G0272813</a><br>Direct link via UniProt ID:<br><a href="http://www.ebi.ac.uk/QuickGO/GProtein?ac=P06493">http://www.ebi.ac.uk/QuickGO/GProtein?ac=P06493</a> | (Huntley <i>et al.</i> , 2009) |
| PANTHER                                                                                                                                                                                      | Home page: <a href="http://www.pantherdb.org/">http://www.pantherdb.org/</a><br>Direct link to specific PANTHER record via (a) RefSeq nucleotide (b) RefSeq protein (c) UniProt ID:<br>(a) <a href="http://www.pantherdb.org/genes/geneList.do?searchType=basic&amp;fieldName=all&amp;fieldValue=NM_000546">http://www.pantherdb.org/genes/geneList.do?searchType=basic&amp;fieldName=all&amp;fieldValue=NM_000546</a> (human p53)<br>(b) <a href="http://www.pantherdb.org/genes/geneList.do?searchType=basic&amp;fieldName=all&amp;fieldValue=NP_031685">http://www.pantherdb.org/genes/geneList.do?searchType=basic&amp;fieldName=all&amp;fieldValue=NP_031685</a> (mouse Cdk1)<br>(c) <a href="http://www.pantherdb.org/genes/geneList.do?searchType=basic&amp;fieldName=all&amp;fieldValue=Q19196">http://www.pantherdb.org/genes/geneList.do?searchType=basic&amp;fieldName=all&amp;fieldValue=Q19196</a> ( <i>C. elegans</i> DNA pol ε)                                                                                                                                                                                                                                                                                                                                                                                                                                                                                                                                                                                                                                                                                                                                                 | (Mi <i>et al.</i> , 2013)      |
| A list of other GO-related tools is hosted here: <a href="http://neurolex.org/wiki/Category:Resource:Gene_Ontology_Tools">http://neurolex.org/wiki/Category:Resource:Gene_Ontology_Tools</a> |                                                                                                                                                                                                                                                                                                                                                                                                                                                                                                                                                                                                                                                                                                                                                                                                                                                                                                                                                                                                                                                                                                                                                                                                                                                                                                                                                                                                                                                                                                                                                                                                                                                                                                |                                |



## Supplemental Table S6

### Database resources providing information about enzymes, pathways and systems

| Resource                     | Example web-links                                                                                                                                                                                                                                                                                                                                                                                                                                                                                                                                                                                                                                                                                                                                                                                                                                                                                                                                                                                                             | Reference                          |
|------------------------------|-------------------------------------------------------------------------------------------------------------------------------------------------------------------------------------------------------------------------------------------------------------------------------------------------------------------------------------------------------------------------------------------------------------------------------------------------------------------------------------------------------------------------------------------------------------------------------------------------------------------------------------------------------------------------------------------------------------------------------------------------------------------------------------------------------------------------------------------------------------------------------------------------------------------------------------------------------------------------------------------------------------------------------|------------------------------------|
| <i>Biochemical reactions</i> |                                                                                                                                                                                                                                                                                                                                                                                                                                                                                                                                                                                                                                                                                                                                                                                                                                                                                                                                                                                                                               |                                    |
| IntEnz                       | Home page: <a href="http://www.ebi.ac.uk/intenz/">http://www.ebi.ac.uk/intenz/</a><br>Query via gene symbol:<br><a href="http://www.ebi.ac.uk/intenz/query?cmd=Search&amp;q=Cdk1">http://www.ebi.ac.uk/intenz/query?cmd=Search&amp;q=Cdk1</a><br>Query via UniProt ID:<br><a href="http://www.ebi.ac.uk/intenz/query?cmd=Search&amp;q=P06493">http://www.ebi.ac.uk/intenz/query?cmd=Search&amp;q=P06493</a> (human Cdk1)                                                                                                                                                                                                                                                                                                                                                                                                                                                                                                                                                                                                      | (Fleischmann <i>et al.</i> , 2004) |
| BRENDA                       | Home page: <a href="http://www.brenda-enzymes.org/">http://www.brenda-enzymes.org/</a><br>Query via gene name: <a href="http://www.brenda-enzymes.org/index.php4?page=/php/search_result.php4?a=9&amp;W[2]=Cdk1">http://www.brenda-enzymes.org/index.php4?page=/php/search_result.php4?a=9&amp;W[2]=Cdk1</a><br>Query via UniProt ID:<br><a href="http://www.brenda-enzymes.org/php/result_flat.php4?UniProtAcc=P06493">http://www.brenda-enzymes.org/php/result_flat.php4?UniProtAcc=P06493</a> (human Cdk1)                                                                                                                                                                                                                                                                                                                                                                                                                                                                                                                 | (Schomburg <i>et al.</i> , 2013)   |
| Enzyme Portal                | Home page: <a href="http://www.ebi.ac.uk/enzymeportal/">http://www.ebi.ac.uk/enzymeportal/</a><br>Query via gene symbol:<br><a href="http://www.ebi.ac.uk/enzymeportal/search?searchparams.type=KEYWORD&amp;searchparams.previousstext=&amp;searchparams.start=0&amp;searchparams.text=PKM">http://www.ebi.ac.uk/enzymeportal/search?searchparams.type=KEYWORD&amp;searchparams.previousstext=&amp;searchparams.start=0&amp;searchparams.text=PKM</a><br>Direct link to enzyme page via UniProt ID:<br><a href="http://www.ebi.ac.uk/enzymeportal/search/P06493/enzyme">http://www.ebi.ac.uk/enzymeportal/search/P06493/enzyme</a> (human Cdk1)                                                                                                                                                                                                                                                                                                                                                                               | (Alcántara <i>et al.</i> , 2013)   |
| <i>Signaling pathways</i>    |                                                                                                                                                                                                                                                                                                                                                                                                                                                                                                                                                                                                                                                                                                                                                                                                                                                                                                                                                                                                                               |                                    |
| BioCarta Pathways            | Home page: <a href="http://www.biocarta.com/genes/index.asp">http://www.biocarta.com/genes/index.asp</a><br>Example pathway diagram "Cell Cycle: G1/S Check Point":<br><a href="http://www.biocarta.com/pathfiles/h_g1Pathway.asp">http://www.biocarta.com/pathfiles/h_g1Pathway.asp</a>                                                                                                                                                                                                                                                                                                                                                                                                                                                                                                                                                                                                                                                                                                                                      | (Nishimura, 2001)                  |
| KEGG PATHWAY                 | Home page: <a href="http://www.genome.jp/kegg/pathway.html">http://www.genome.jp/kegg/pathway.html</a><br>Query pathways via gene symbol: <a href="http://www.genome.jp/kegg-bin/search_pathway_text?map=map&amp;mode=1&amp;viewImage=true&amp;keyword=TP53">http://www.genome.jp/kegg-bin/search_pathway_text?map=map&amp;mode=1&amp;viewImage=true&amp;keyword=TP53</a> (p53)<br>Example pathway diagram "CELL CYCLE", with p53 highlighted:<br><a href="http://www.kegg.jp/kegg-bin/highlight_pathway?scale=1.0&amp;map=map04110&amp;keyword=TP53">http://www.kegg.jp/kegg-bin/highlight_pathway?scale=1.0&amp;map=map04110&amp;keyword=TP53</a>                                                                                                                                                                                                                                                                                                                                                                           | (Kanehisa <i>et al.</i> , 2014)    |
| Reactome                     | Home page: <a href="http://www.reactome.org/">http://www.reactome.org/</a><br>Query via (a) gene symbol (b) Ensembl gene, RefSeq nucleotide or protein, or UniProt ID:<br>(a) <a href="http://www.reactome.org/cgi-bin/search?DB=gk_current&amp;OPERATOR=ALL&amp;QUERY=TP53">http://www.reactome.org/cgi-bin/search?DB=gk_current&amp;OPERATOR=ALL&amp;QUERY=TP53</a> (p53)<br>(b) <a href="http://www.reactome.org/cgi-bin/search?DB=gk_current&amp;OPERATOR=ALL&amp;QUERY=NM_006231">http://www.reactome.org/cgi-bin/search?DB=gk_current&amp;OPERATOR=ALL&amp;QUERY=NM_006231</a> (DNA pol e)<br>Example pathway diagram "Cell Cycle Checkpoints"; highlighted section, "p53-Dependent G1 DNA Damage Response":<br><a href="http://www.reactome.org/entitylevelview/PathwayBrowser.html#DB=gk_current&amp;FOCUS_SPECIES_ID=48887&amp;FOCUS_PATHWAY_ID=69620&amp;ID=69563">http://www.reactome.org/entitylevelview/PathwayBrowser.html#DB=gk_current&amp;FOCUS_SPECIES_ID=48887&amp;FOCUS_PATHWAY_ID=69620&amp;ID=69563</a> | (Croft <i>et al.</i> , 2014)       |
| WikiPathways                 | Home page: <a href="http://wikipathways.org/">http://wikipathways.org/</a><br>Query via (a) gene name/symbol (b) organism name plus gene symbol:<br>(a) <a href="http://wikipathways.org//index.php?title=Special%3ASearchPathways&amp;doSearch=1&amp;query=CDK1">http://wikipathways.org//index.php?title=Special%3ASearchPathways&amp;doSearch=1&amp;query=CDK1</a><br>(b) <a href="http://wikipathways.org//index.php?title=Special%3ASearchPathways&amp;doSearch=1&amp;species=Homo+sapiens&amp;query=TP53">http://wikipathways.org//index.php?title=Special%3ASearchPathways&amp;doSearch=1&amp;species=Homo+sapiens&amp;query=TP53</a>                                                                                                                                                                                                                                                                                                                                                                                  | (Kelder <i>et al.</i> , 2012)      |
| Pathway Commons              | Home page: <a href="http://www.pathwaycommons.org/">http://www.pathwaycommons.org/</a><br>Query pathways via gene symbol or UniProt ID:<br><a href="http://www.pathwaycommons.org/pc/webservice.do?version=3.0&amp;format=html&amp;cmd=get_by_keyword&amp;snapshot_id=GLOBAL_FILTER_SETTING&amp;record_type=PATHWAY&amp;q=P04637">http://www.pathwaycommons.org/pc/webservice.do?version=3.0&amp;format=html&amp;cmd=get_by_keyword&amp;snapshot_id=GLOBAL_FILTER_SETTING&amp;record_type=PATHWAY&amp;q=P04637</a><br>Link to Network Visualizer via gene symbol or UniProt ID:<br><a href="http://www.pathwaycommons.org/pcviz/#neighborhood/ABL1">http://www.pathwaycommons.org/pcviz/#neighborhood/ABL1</a>                                                                                                                                                                                                                                                                                                                | (Cerami <i>et al.</i> , 2011)      |
| <i>Biological Systems</i>    |                                                                                                                                                                                                                                                                                                                                                                                                                                                                                                                                                                                                                                                                                                                                                                                                                                                                                                                                                                                                                               |                                    |
| BioSystems (NCBI)            | Home page: <a href="http://www.ncbi.nlm.nih.gov/biosystems/">http://www.ncbi.nlm.nih.gov/biosystems/</a><br>Query via (a) gene symbol (b) RefSeq or GenBank protein (c) UniProt ID:<br>(a) <a href="http://www.ncbi.nlm.nih.gov/biosystems/?term=TP53">http://www.ncbi.nlm.nih.gov/biosystems/?term=TP53</a> (p53)<br>(b) <a href="http://www.ncbi.nlm.nih.gov/biosystems/?term=NP_031685">http://www.ncbi.nlm.nih.gov/biosystems/?term=NP_031685</a> (Cdk1)<br>(c) <a href="http://www.ncbi.nlm.nih.gov/biosystems/?term=Q9H410">http://www.ncbi.nlm.nih.gov/biosystems/?term=Q9H410</a>                                                                                                                                                                                                                                                                                                                                                                                                                                     | (Geer <i>et al.</i> , 2010)        |

## Supplemental Table S7

### Database resources providing primary information on gene or protein function from specific research projects

| Resource                                                                                 | Example web-links                                                                                                                                                                                                                                                                                                                                                                                                                                                                                                                                                                                                                                                                                                                                                                                                                                                                                                                                                                                                                                                                                                                    | Reference                                                                          |
|------------------------------------------------------------------------------------------|--------------------------------------------------------------------------------------------------------------------------------------------------------------------------------------------------------------------------------------------------------------------------------------------------------------------------------------------------------------------------------------------------------------------------------------------------------------------------------------------------------------------------------------------------------------------------------------------------------------------------------------------------------------------------------------------------------------------------------------------------------------------------------------------------------------------------------------------------------------------------------------------------------------------------------------------------------------------------------------------------------------------------------------------------------------------------------------------------------------------------------------|------------------------------------------------------------------------------------|
| <i>Specific research projects</i>                                                        |                                                                                                                                                                                                                                                                                                                                                                                                                                                                                                                                                                                                                                                                                                                                                                                                                                                                                                                                                                                                                                                                                                                                      |                                                                                    |
| <i>S. pombe</i> deletion screen ( <i>PomBase</i> )                                       | Home page: <a href="http://www.pombase.org/">http://www.pombase.org/</a><br>Query via any term, e.g. gene name: <a href="http://www.pombase.org/search/ensembl/cdc2">http://www.pombase.org/search/ensembl/cdc2</a> (Cdk1)<br>Direct link to gene page via (a) systematic gene ID (b) RefSeq nucleotide (c) RefSeq protein (d) UniProt ID:<br>(a) <a href="http://www.pombase.org/spombe/result/SPBC25H2.13c">http://www.pombase.org/spombe/result/SPBC25H2.13c</a> (DNA pol 2)<br>(b) <a href="http://www.pombase.org/search/ensembl/NM_001021855">http://www.pombase.org/search/ensembl/NM_001021855</a><br>(c) <a href="http://www.pombase.org/search/ensembl/NP_593305">http://www.pombase.org/search/ensembl/NP_593305</a><br>(d) <a href="http://www.pombase.org/search/ensembl/P30290">http://www.pombase.org/search/ensembl/P30290</a>                                                                                                                                                                                                                                                                                       | (Kim <i>et al.</i> , 2010; Wood <i>et al.</i> , 2012; Hayles <i>et al.</i> , 2013) |
| <i>C. elegans</i> RNAi screen ( <i>PhenoBank</i> )                                       | Home page: <a href="http://www.worm.mpi-cbg.de/phenobank/">http://www.worm.mpi-cbg.de/phenobank/</a><br>Direct link to Gene Summary page via <i>C. elegans</i> sequence code: <a href="http://www.worm.mpi-cbg.de/phenobank/cgi-bin/GenePage.py?Gene=T05G5.3">http://www.worm.mpi-cbg.de/phenobank/cgi-bin/GenePage.py?Gene=T05G5.3</a> (Cdk1)                                                                                                                                                                                                                                                                                                                                                                                                                                                                                                                                                                                                                                                                                                                                                                                       | (Sönnichsen <i>et al.</i> , 2005)                                                  |
| Human RNAi screens, mitotic protein interaction & localization data ( <i>MitoCheck</i> ) | Home page: <a href="http://www.mitocheck.org/cgi-bin/mtc/">http://www.mitocheck.org/cgi-bin/mtc/</a><br>Query via (a) generic gene or protein term (b) gene symbol:<br>(a) <a href="http://www.mitocheck.org/cgi-bin/mtc?query=importin">http://www.mitocheck.org/cgi-bin/mtc?query=importin</a><br>(b) <a href="http://www.mitocheck.org/cgi-bin/mtc?query=TP53">http://www.mitocheck.org/cgi-bin/mtc?query=TP53</a> (p53)<br>Direct link to gene page via human (c) Ensembl gene (d) UniProt ID:<br>(c) <a href="http://www.mitocheck.org/cgi-bin/mtc?query=ENSG00000170312">http://www.mitocheck.org/cgi-bin/mtc?query=ENSG00000170312</a> (Cdk1)<br>(d) <a href="http://www.mitocheck.org/cgi-bin/mtc?query=Q07864">http://www.mitocheck.org/cgi-bin/mtc?query=Q07864</a> (DNA pol ε)<br>Query via non-human orthologue (e) gene name (f) Ensembl gene ID:<br>(e) <a href="http://www.mitocheck.org/cgi-bin/mtc?query=IPL1">http://www.mitocheck.org/cgi-bin/mtc?query=IPL1</a><br>(f) <a href="http://www.mitocheck.org/cgi-bin/mtc?query=ENSDARG00000087554">http://www.mitocheck.org/cgi-bin/mtc?query=ENSDARG00000087554</a> | (Hutchins <i>et al.</i> , 2010; Neumann <i>et al.</i> , 2010)                      |

## Supplemental Table S8

### Resources for identifying homologues and determining evolutionary conservation

| Resource                                             | Example web-links                                                                                                                                                                                                                                                                                                                                                                                                                                                                                                                                                                                                                                                                                                                                                                                                                                                                                                                                                                                                                                                                                                                                                                                                                                                                                                                                                                                                                                                                                                                                                                                          | Reference                                   |
|------------------------------------------------------|------------------------------------------------------------------------------------------------------------------------------------------------------------------------------------------------------------------------------------------------------------------------------------------------------------------------------------------------------------------------------------------------------------------------------------------------------------------------------------------------------------------------------------------------------------------------------------------------------------------------------------------------------------------------------------------------------------------------------------------------------------------------------------------------------------------------------------------------------------------------------------------------------------------------------------------------------------------------------------------------------------------------------------------------------------------------------------------------------------------------------------------------------------------------------------------------------------------------------------------------------------------------------------------------------------------------------------------------------------------------------------------------------------------------------------------------------------------------------------------------------------------------------------------------------------------------------------------------------------|---------------------------------------------|
| <i>Listings of pre-identified homologues</i>         |                                                                                                                                                                                                                                                                                                                                                                                                                                                                                                                                                                                                                                                                                                                                                                                                                                                                                                                                                                                                                                                                                                                                                                                                                                                                                                                                                                                                                                                                                                                                                                                                            |                                             |
| Ensembl Orthologues                                  | Link via Ensembl gene ID:<br><a href="http://www.ensembl.org/Gene/Compara_Ortholog?g=ENSG00000158402">http://www.ensembl.org/Gene/Compara_Ortholog?g=ENSG00000158402</a><br>Link via species abbreviation plus (a) gene symbol (b) RefSeq nucleotide (c) RefSeq protein (d) UniProt ID:<br>(a) <a href="http://www.ensembl.org/H_sapiens/Gene/Compara_Ortholog?g=CDK1">http://www.ensembl.org/H_sapiens/Gene/Compara_Ortholog?g=CDK1</a><br>(b) <a href="http://www.ensembl.org/M_musculus/Gene/Compara_Ortholog?g=NM_027830">http://www.ensembl.org/M_musculus/Gene/Compara_Ortholog?g=NM_027830</a><br>(c) <a href="http://www.ensembl.org/X_tropicalis/Gene/Compara_Ortholog?g=NP_001107968">http://www.ensembl.org/X_tropicalis/Gene/Compara_Ortholog?g=NP_001107968</a><br>(d) <a href="http://www.ensembl.org/D_rerio/Gene/Compara_Ortholog?g=F1QD19">http://www.ensembl.org/D_rerio/Gene/Compara_Ortholog?g=F1QD19</a>                                                                                                                                                                                                                                                                                                                                                                                                                                                                                                                                                                                                                                                                              | (Flicek <i>et al.</i> , 2014)               |
| Ensembl Paralogues                                   | Link via Ensembl gene ID:<br><a href="http://www.ensembl.org/H_sapiens/Gene/Compara_Paralog?g=ENSG00000164045">http://www.ensembl.org/H_sapiens/Gene/Compara_Paralog?g=ENSG00000164045</a><br>Link via species abbreviation plus (a) gene symbol (b) RefSeq nucleotide (c) RefSeq protein (d) UniProt ID:<br>(a) <a href="http://www.ensembl.org/H_sapiens/Gene/Compara_Paralog?g=AURKA">http://www.ensembl.org/H_sapiens/Gene/Compara_Paralog?g=AURKA</a><br>(b) <a href="http://www.ensembl.org/M_musculus/Gene/Compara_Paralog?g=NM_015733">http://www.ensembl.org/M_musculus/Gene/Compara_Paralog?g=NM_015733</a><br>(c) <a href="http://www.ensembl.org/R_norvegicus/Gene/Compara_Paralog?g=NP_598256">http://www.ensembl.org/R_norvegicus/Gene/Compara_Paralog?g=NP_598256</a><br>(d) <a href="http://www.ensembl.org/D_rerio/Gene/Compara_Paralog?g=P79734">http://www.ensembl.org/D_rerio/Gene/Compara_Paralog?g=P79734</a>                                                                                                                                                                                                                                                                                                                                                                                                                                                                                                                                                                                                                                                                        | (Flicek <i>et al.</i> , 2014)               |
| NCBI HomoloGene                                      | Home page: <a href="http://www.ncbi.nlm.nih.gov/homologene/">http://www.ncbi.nlm.nih.gov/homologene/</a><br>Direct link via (a) gene symbol (b) NCBI gene ID (c) RefSeq nucleotide (d) RefSeq protein:<br>(a) <a href="http://www.ncbi.nlm.nih.gov/homologene?term=TP53">http://www.ncbi.nlm.nih.gov/homologene?term=TP53</a> (p53)<br>(b) <a href="http://www.ncbi.nlm.nih.gov/homologene?term=983[GeneID]">http://www.ncbi.nlm.nih.gov/homologene?term=983[GeneID]</a> (human Cdk1)<br>(c) <a href="http://www.ncbi.nlm.nih.gov/homologene?term=XM_001233984">http://www.ncbi.nlm.nih.gov/homologene?term=XM_001233984</a> (chicken DNA pol ε)<br>(d) <a href="http://www.ncbi.nlm.nih.gov/homologene?term=NP_035145">http://www.ncbi.nlm.nih.gov/homologene?term=NP_035145</a>                                                                                                                                                                                                                                                                                                                                                                                                                                                                                                                                                                                                                                                                                                                                                                                                                          | (NCBI, 2014)                                |
| <i>Retrieval of similar-sequence protein entries</i> |                                                                                                                                                                                                                                                                                                                                                                                                                                                                                                                                                                                                                                                                                                                                                                                                                                                                                                                                                                                                                                                                                                                                                                                                                                                                                                                                                                                                                                                                                                                                                                                                            |                                             |
| UniProt Reference Clusters (UniRef)                  | UniRef100 (100% identity), via UniProt ID:<br><a href="http://www.uniprot.org/uniprot/?query=cluster:(member:P04637+identity:1.0)">http://www.uniprot.org/uniprot/?query=cluster:(member:P04637+identity:1.0)</a> (human p53)<br>UniRef90 (90% identity), via RefSeq mRNA ID:<br><a href="http://www.uniprot.org/uniprot/?query=cluster:(uniprot:(NM_007659)+identity:0.9)">http://www.uniprot.org/uniprot/?query=cluster:(uniprot:(NM_007659)+identity:0.9)</a> (mouse Cdk1)<br>UniRef50 (50% identity), via RefSeq protein ID:<br><a href="http://www.uniprot.org/uniprot/?query=cluster:(uniprot:(NP_001100622)+identity:0.5)">http://www.uniprot.org/uniprot/?query=cluster:(uniprot:(NP_001100622)+identity:0.5)</a> (rat DNA pol ε)                                                                                                                                                                                                                                                                                                                                                                                                                                                                                                                                                                                                                                                                                                                                                                                                                                                                  | (Suzek <i>et al.</i> , 2007; UniProt, 2014) |
| <i>Retrieval of phylogenetic trees</i>               |                                                                                                                                                                                                                                                                                                                                                                                                                                                                                                                                                                                                                                                                                                                                                                                                                                                                                                                                                                                                                                                                                                                                                                                                                                                                                                                                                                                                                                                                                                                                                                                                            |                                             |
| TreeFam                                              | Home page: <a href="http://www.treefam.org/">http://www.treefam.org/</a><br>Direct link to Summary view via: (a) gene symbol (b) Ensembl gene (c) FlyBase gene (d) Ensembl protein (e) UniProt ID:<br>(a) <a href="http://www.treefam.org/family/TP53">http://www.treefam.org/family/TP53</a> (p53)<br>(b) <a href="http://www.treefam.org/family/ENSMUSG00000019942">http://www.treefam.org/family/ENSMUSG00000019942</a> (mouse Cdk1)<br>(c) <a href="http://www.treefam.org/family/FBgn0264326">http://www.treefam.org/family/FBgn0264326</a> ( <i>Drosophila</i> DNA pol ε)<br>(d) <a href="http://www.treefam.org/family/ENSP00000428982">http://www.treefam.org/family/ENSP00000428982</a><br>(e) <a href="http://www.treefam.org/family/P06493">http://www.treefam.org/family/P06493</a><br>Direct link to Gene Tree view via: (f) gene symbol (g) Ensembl gene (h) FlyBase gene (i) Ensembl protein (j) UniProt ID:<br>(f) <a href="http://www.treefam.org/family/BRCA2#tabview=tab1">http://www.treefam.org/family/BRCA2#tabview=tab1</a><br>(g) <a href="http://www.treefam.org/family/ENSMUSG00000032113#tabview=tab1">http://www.treefam.org/family/ENSMUSG00000032113#tabview=tab1</a><br>(h) <a href="http://www.treefam.org/family/FBgn0003124#tabview=tab1">http://www.treefam.org/family/FBgn0003124#tabview=tab1</a><br>(i) <a href="http://www.treefam.org/family/ENSP00000428982#tabview=tab1">http://www.treefam.org/family/ENSP00000428982#tabview=tab1</a><br>(j) <a href="http://www.treefam.org/family/P06493#tabview=tab1">http://www.treefam.org/family/P06493#tabview=tab1</a> | (Schreiber <i>et al.</i> , 2014)            |
| <i>Launch of sequence similarity searches</i>        |                                                                                                                                                                                                                                                                                                                                                                                                                                                                                                                                                                                                                                                                                                                                                                                                                                                                                                                                                                                                                                                                                                                                                                                                                                                                                                                                                                                                                                                                                                                                                                                                            |                                             |
| BLAST at NCBI                                        | Home page: <a href="http://blast.ncbi.nlm.nih.gov/">http://blast.ncbi.nlm.nih.gov/</a><br>Nucleotide via RefSeq mRNA ID:<br><a href="http://blast.ncbi.nlm.nih.gov/Blast.cgi?PAGE=Nucleotides&amp;QUERY=NM_001071775.2">http://blast.ncbi.nlm.nih.gov/Blast.cgi?PAGE=Nucleotides&amp;QUERY=NM_001071775.2</a><br>Protein via RefSeq protein ID:<br><a href="http://blast.ncbi.nlm.nih.gov/Blast.cgi?BLAST_PROGRAMS=blastp&amp;PAGE_TYPE=BlastSearch&amp;QUERY=NP_524860">http://blast.ncbi.nlm.nih.gov/Blast.cgi?BLAST_PROGRAMS=blastp&amp;PAGE_TYPE=BlastSearch&amp;QUERY=NP_524860</a>                                                                                                                                                                                                                                                                                                                                                                                                                                                                                                                                                                                                                                                                                                                                                                                                                                                                                                                                                                                                                   | (NCBI, 2014)                                |
| BLAST protein at UniProt                             | Home page: <a href="http://www.uniprot.org/?tab=blast">http://www.uniprot.org/?tab=blast</a><br>Launch via UniProt ID: <a href="http://www.uniprot.org/blast/?query=P04637">http://www.uniprot.org/blast/?query=P04637</a> (p53)                                                                                                                                                                                                                                                                                                                                                                                                                                                                                                                                                                                                                                                                                                                                                                                                                                                                                                                                                                                                                                                                                                                                                                                                                                                                                                                                                                           | (UniProt, 2014)                             |

## Supplemental Table S9

### Database resources providing information about gene expression

| Resource                          | Example web-links                                                                                                                                                                                                                                                                                                                                                                                                                                                                                                                                                                                                                                                                                                                                                                                                                                                                                                                                                                                                                                                                                                                                                                                                                                                                                                                                                                                                                                                                                                                  | Reference                         |
|-----------------------------------|------------------------------------------------------------------------------------------------------------------------------------------------------------------------------------------------------------------------------------------------------------------------------------------------------------------------------------------------------------------------------------------------------------------------------------------------------------------------------------------------------------------------------------------------------------------------------------------------------------------------------------------------------------------------------------------------------------------------------------------------------------------------------------------------------------------------------------------------------------------------------------------------------------------------------------------------------------------------------------------------------------------------------------------------------------------------------------------------------------------------------------------------------------------------------------------------------------------------------------------------------------------------------------------------------------------------------------------------------------------------------------------------------------------------------------------------------------------------------------------------------------------------------------|-----------------------------------|
| SPELL<br>( <i>S. cerevisiae</i> ) | Home page: <a href="http://spell.princeton.edu/spell/">http://spell.princeton.edu/spell/</a><br>Query via (a) standard gene name (b) systematic gene name:<br>(a) <a href="http://spell.princeton.edu/spell/search/show_results?search_string=CDC28">http://spell.princeton.edu/spell/search/show_results?search_string=CDC28</a> (Cdk1)<br>(b) <a href="http://spell.princeton.edu/spell/search/show_results?search_string=YPL209C">http://spell.princeton.edu/spell/search/show_results?search_string=YPL209C</a>                                                                                                                                                                                                                                                                                                                                                                                                                                                                                                                                                                                                                                                                                                                                                                                                                                                                                                                                                                                                                | (Hibbs <i>et al.</i> , 2007)      |
| Gene Expression Omnibus           | Home page: <a href="http://www.ncbi.nlm.nih.gov/geoprofiles/">http://www.ncbi.nlm.nih.gov/geoprofiles/</a><br>Query via (a) text term, e.g. gene symbol (b) RefSeq nucleotide ID (c) NCBI nucleotide GI number:<br>(a) <a href="http://www.ncbi.nlm.nih.gov/geoprofiles?term=TP53">http://www.ncbi.nlm.nih.gov/geoprofiles?term=TP53</a> (p53)<br>(b) <a href="http://www.ncbi.nlm.nih.gov/geoprofiles?term=NM_001071775">http://www.ncbi.nlm.nih.gov/geoprofiles?term=NM_001071775</a><br>(c) <a href="http://www.ncbi.nlm.nih.gov/geoprofiles?term=38014291[GI]">http://www.ncbi.nlm.nih.gov/geoprofiles?term=38014291[GI]</a>                                                                                                                                                                                                                                                                                                                                                                                                                                                                                                                                                                                                                                                                                                                                                                                                                                                                                                   | (Barrett <i>et al.</i> , 2013)    |
| ArrayExpress                      | Home page: <a href="http://www.ebi.ac.uk/arrayexpress/">http://www.ebi.ac.uk/arrayexpress/</a><br>Query via (a) text term (b) organism name plus gene symbol:<br>(a) <a href="http://www.ebi.ac.uk/arrayexpress/browse.html?keywords=cyclin">http://www.ebi.ac.uk/arrayexpress/browse.html?keywords=cyclin</a><br>(b) <a href="http://www.ebi.ac.uk/arrayexpress/browse.html?keywords=Homo+sapiens+TP53">http://www.ebi.ac.uk/arrayexpress/browse.html?keywords=Homo+sapiens+TP53</a>                                                                                                                                                                                                                                                                                                                                                                                                                                                                                                                                                                                                                                                                                                                                                                                                                                                                                                                                                                                                                                              | (Rustici <i>et al.</i> , 2013)    |
| Gene Expression Atlas             | Home page: <a href="http://www.ebi.ac.uk/gxa/">http://www.ebi.ac.uk/gxa/</a><br>Query via text term, e.g. gene symbol (across species):<br><a href="http://www.ebi.ac.uk/gxa/query?geneQuery=RAD21">http://www.ebi.ac.uk/gxa/query?geneQuery=RAD21</a><br>Direct link via Ensembl gene ID:<br><a href="http://www.ebi.ac.uk/gxa/genes/ENSG00000141510">http://www.ebi.ac.uk/gxa/genes/ENSG00000141510</a> (human p53)<br>Direct link via mouse (MGI) gene ID:<br><a href="http://www.ebi.ac.uk/gxa/query?geneQuery=MGI:88351">http://www.ebi.ac.uk/gxa/query?geneQuery=MGI:88351</a> (Cdk1)<br>Direct link via <i>C. elegans</i> gene code:<br><a href="http://www.ebi.ac.uk/gxa/genes/K08E3.6">http://www.ebi.ac.uk/gxa/genes/K08E3.6</a> (DNA pol ε)<br>Direct link via FlyBase ID:<br><a href="http://www.ebi.ac.uk/gxa/genes/FBgn0000147">http://www.ebi.ac.uk/gxa/genes/FBgn0000147</a><br>Direct link via Ensembl transcript ID:<br><a href="http://www.ebi.ac.uk/gxa/genes/ENST00000509894">http://www.ebi.ac.uk/gxa/genes/ENST00000509894</a><br>Direct link via RefSeq nucleotide ID:<br><a href="http://www.ebi.ac.uk/gxa/query?geneQuery=NM_000546">http://www.ebi.ac.uk/gxa/query?geneQuery=NM_000546</a><br>Direct link via RefSeq protein ID:<br><a href="http://www.ebi.ac.uk/gxa/query?geneQuery=NP_009125">http://www.ebi.ac.uk/gxa/query?geneQuery=NP_009125</a><br>Direct link via UniProt ID:<br><a href="http://www.ebi.ac.uk/gxa/query?geneQuery=P04637">http://www.ebi.ac.uk/gxa/query?geneQuery=P04637</a> | (Kapushesky <i>et al.</i> , 2012) |
| The Human Protein Atlas           | Home page: <a href="http://www.proteinatlas.org/">http://www.proteinatlas.org/</a><br>Query via text term (e.g. gene symbol):<br><a href="http://www.proteinatlas.org/search/TP53">http://www.proteinatlas.org/search/TP53</a> (p53)<br>Query via human Ensembl transcript ID:<br><a href="http://www.proteinatlas.org/search/ENST00000395284">http://www.proteinatlas.org/search/ENST00000395284</a> (Cdk1)<br>Query via human Ensembl protein ID:<br><a href="http://www.proteinatlas.org/search/ENSP00000322570">http://www.proteinatlas.org/search/ENSP00000322570</a> (DNA pol ε)<br>Query via human UniProt ID:<br><a href="http://www.proteinatlas.org/search/O60566">http://www.proteinatlas.org/search/O60566</a><br>Direct link to database entry via human Ensembl gene ID:<br><a href="http://www.proteinatlas.org/ENSG00000156970">http://www.proteinatlas.org/ENSG00000156970</a>                                                                                                                                                                                                                                                                                                                                                                                                                                                                                                                                                                                                                                    | (Asplund <i>et al.</i> , 2012)    |

## Supplemental Table S10

### Database resources: protein domains and short linear motifs (SLiMs)

| Resource                                                 | Example web-links                                                                                                                                                                                                                                                                                                                                                                                                                                                                                                                                                                                                                                                                                                                                                                                                                                                                                                                                                                                                                                   | Reference                             |
|----------------------------------------------------------|-----------------------------------------------------------------------------------------------------------------------------------------------------------------------------------------------------------------------------------------------------------------------------------------------------------------------------------------------------------------------------------------------------------------------------------------------------------------------------------------------------------------------------------------------------------------------------------------------------------------------------------------------------------------------------------------------------------------------------------------------------------------------------------------------------------------------------------------------------------------------------------------------------------------------------------------------------------------------------------------------------------------------------------------------------|---------------------------------------|
| <i>Annotation of protein domains</i>                     |                                                                                                                                                                                                                                                                                                                                                                                                                                                                                                                                                                                                                                                                                                                                                                                                                                                                                                                                                                                                                                                     |                                       |
| Pfam                                                     | Home page: <a href="http://pfam.sanger.ac.uk/">http://pfam.sanger.ac.uk/</a><br>Query via UniProt name: <a href="http://pfam.sanger.ac.uk/protein/P53_HUMAN">http://pfam.sanger.ac.uk/protein/P53_HUMAN</a><br>Query via UniProt ID: <a href="http://pfam.sanger.ac.uk/protein/G3SP81">http://pfam.sanger.ac.uk/protein/G3SP81</a>                                                                                                                                                                                                                                                                                                                                                                                                                                                                                                                                                                                                                                                                                                                  | (Finn <i>et al.</i> , 2014)           |
| InterPro                                                 | Home page: <a href="http://www.ebi.ac.uk/interpro/">http://www.ebi.ac.uk/interpro/</a><br>Query via any term: <a href="http://www.ebi.ac.uk/interpro/search?q=Cdk1">http://www.ebi.ac.uk/interpro/search?q=Cdk1</a><br>Link via UniProt ID: <a href="http://www.ebi.ac.uk/interpro/protein/P04637">http://www.ebi.ac.uk/interpro/protein/P04637</a> (p53)                                                                                                                                                                                                                                                                                                                                                                                                                                                                                                                                                                                                                                                                                           | (Hunter <i>et al.</i> , 2012)         |
| SMART                                                    | Home page: <a href="http://smart.embl.de/">http://smart.embl.de/</a><br>Direct link via (a) Ensembl protein ID (b) UniProt name (c) UniProt ID (d) UniProt ID, including Pfam domains:<br>(a) <a href="http://smart.embl.de/smart/show_motifs.pl?ID=ENSP00000322570">http://smart.embl.de/smart/show_motifs.pl?ID=ENSP00000322570</a> (DNA pol ε)<br>(b) <a href="http://smart.embl.de/smart/show_motifs.pl?ID=CDK1_MOUSE">http://smart.embl.de/smart/show_motifs.pl?ID=CDK1_MOUSE</a><br>(c) <a href="http://smart.embl.de/smart/show_motifs.pl?ID=P04637">http://smart.embl.de/smart/show_motifs.pl?ID=P04637</a> (human p53)<br>(d) <a href="http://smart.embl.de/smart/show_motifs.pl?DO_PFAM=DO_PFAM&amp;ID=P04637">http://smart.embl.de/smart/show_motifs.pl?DO_PFAM=DO_PFAM&amp;ID=P04637</a>                                                                                                                                                                                                                                                | (Letunic <i>et al.</i> , 2012)        |
| Gene3D                                                   | Home page: <a href="http://gene3d.biochem.ucl.ac.uk/">http://gene3d.biochem.ucl.ac.uk/</a><br>Query via (a) gene symbol (b) Ensembl gene (c) RefSeq nucleotide or protein (d) UniProt ID:<br>(a) <a href="http://gene3d.biochem.ucl.ac.uk/search?mode=protein&amp;stern=CHEK1">http://gene3d.biochem.ucl.ac.uk/search?mode=protein&amp;stern=CHEK1</a><br>(b) <a href="http://gene3d.biochem.ucl.ac.uk/search?mode=protein&amp;stern=ENSG00000156970">http://gene3d.biochem.ucl.ac.uk/search?mode=protein&amp;stern=ENSG00000156970</a><br>(c) <a href="http://gene3d.biochem.ucl.ac.uk/search?mode=protein&amp;stern=NM_001790">http://gene3d.biochem.ucl.ac.uk/search?mode=protein&amp;stern=NM_001790</a><br>(d) <a href="http://gene3d.biochem.ucl.ac.uk/search?mode=protein&amp;stern=P04637">http://gene3d.biochem.ucl.ac.uk/search?mode=protein&amp;stern=P04637</a>                                                                                                                                                                         | (Lees <i>et al.</i> , 2014)           |
| <i>Prediction of SLiMs</i>                               |                                                                                                                                                                                                                                                                                                                                                                                                                                                                                                                                                                                                                                                                                                                                                                                                                                                                                                                                                                                                                                                     |                                       |
| PROSITE                                                  | Home page: <a href="http://prosite.expasy.org/">http://prosite.expasy.org/</a><br>Direct link via UniProt ID:<br><a href="http://www.expasy.org/cgi-bin/prosite/PSScan.cgi?seq=P04637">http://www.expasy.org/cgi-bin/prosite/PSScan.cgi?seq=P04637</a> (p53)<br>Direct link via UniProt name:<br><a href="http://www.expasy.org/cgi-bin/prosite/PSScan.cgi?seq=RCC1_HUMAN">http://www.expasy.org/cgi-bin/prosite/PSScan.cgi?seq=RCC1_HUMAN</a>                                                                                                                                                                                                                                                                                                                                                                                                                                                                                                                                                                                                      | (Sigrist <i>et al.</i> , 2013)        |
| Minimotif Miner                                          | Home page: <a href="http://minimotifminer.org">http://minimotifminer.org</a>                                                                                                                                                                                                                                                                                                                                                                                                                                                                                                                                                                                                                                                                                                                                                                                                                                                                                                                                                                        | (Mi <i>et al.</i> , 2012)             |
| Scansite                                                 | Home page: <a href="http://scansite.mit.edu/">http://scansite.mit.edu/</a><br>Direct link via UniProt ID: <a href="http://scansite.mit.edu/cgi-bin/motifscan_id?database=swissprot&amp;motif_option=all&amp;stringency=High&amp;protein_id=P04637">http://scansite.mit.edu/cgi-bin/motifscan_id?database=swissprot&amp;motif_option=all&amp;stringency=High&amp;protein_id=P04637</a> (p53)                                                                                                                                                                                                                                                                                                                                                                                                                                                                                                                                                                                                                                                         | (Obenauer <i>et al.</i> , 2003)       |
| <i>Annotation of protein domains and SLiMs</i>           |                                                                                                                                                                                                                                                                                                                                                                                                                                                                                                                                                                                                                                                                                                                                                                                                                                                                                                                                                                                                                                                     |                                       |
| Conserved Domain Database (CDD)                          | Home page: <a href="http://www.ncbi.nlm.nih.gov/Structure/cdd/cdd.shtml">http://www.ncbi.nlm.nih.gov/Structure/cdd/cdd.shtml</a><br>Direct link via (a) RefSeq mRNA (b) RefSeq protein (c) UniProt name (d) UniProt ID:<br>(a) <a href="http://www.ncbi.nlm.nih.gov/Structure/cdd/wrpsb.cgi?INPUT_TYPE=I&amp;SEQUENCE=NP_000537.3">http://www.ncbi.nlm.nih.gov/Structure/cdd/wrpsb.cgi?INPUT_TYPE=I&amp;SEQUENCE=NP_000537.3</a> (p53)<br>(b) <a href="http://www.ncbi.nlm.nih.gov/Structure/cdd/wrpsb.cgi?INPUT_TYPE=I&amp;SEQUENCE=NP_035145">http://www.ncbi.nlm.nih.gov/Structure/cdd/wrpsb.cgi?INPUT_TYPE=I&amp;SEQUENCE=NP_035145</a><br>(c) <a href="http://www.ncbi.nlm.nih.gov/Structure/cdd/wrpsb.cgi?INPUT_TYPE=I&amp;SEQUENCE=RAD53_YEAST">http://www.ncbi.nlm.nih.gov/Structure/cdd/wrpsb.cgi?INPUT_TYPE=I&amp;SEQUENCE=RAD53_YEAST</a><br>(d) <a href="http://www.ncbi.nlm.nih.gov/Structure/cdd/wrpsb.cgi?INPUT_TYPE=I&amp;SEQUENCE=Q8R4E9">http://www.ncbi.nlm.nih.gov/Structure/cdd/wrpsb.cgi?INPUT_TYPE=I&amp;SEQUENCE=Q8R4E9</a> | (Marchler-Bauer <i>et al.</i> , 2013) |
| Eukaryotic Linear Motif (ELM) Functional Site Prediction | Home page: <a href="http://elm.eu.org/">http://elm.eu.org/</a><br>Direct link via (a) UniProt ID (b) UniProt name:<br>(a) <a href="http://elm.eu.org/cgimodel.py?fun=Submit&amp;swissprotId=P04637">http://elm.eu.org/cgimodel.py?fun=Submit&amp;swissprotId=P04637</a> (p53)<br>(b) <a href="http://elm.eu.org/cgimodel.py?fun=Submit&amp;swissprotId=BUB1B_HUMAN">http://elm.eu.org/cgimodel.py?fun=Submit&amp;swissprotId=BUB1B_HUMAN</a>                                                                                                                                                                                                                                                                                                                                                                                                                                                                                                                                                                                                        | (Dinkel <i>et al.</i> , 2014)         |
| DASTy                                                    | Home page: <a href="http://www.ebi.ac.uk/dasty/">http://www.ebi.ac.uk/dasty/</a><br>Direct link via UniProt ID:<br><a href="http://www.ebi.ac.uk/dasty/client/index.html?q=P04637">http://www.ebi.ac.uk/dasty/client/index.html?q=P04637</a> (p53)<br>Direct link via UniProt protein name:<br><a href="http://www.ebi.ac.uk/dasty/client/index.html?q=BRCA1_HUMAN">http://www.ebi.ac.uk/dasty/client/index.html?q=BRCA1_HUMAN</a>                                                                                                                                                                                                                                                                                                                                                                                                                                                                                                                                                                                                                  | (Villaveces <i>et al.</i> , 2011)     |
| ANNIE > Click “Interactive View”                         | Home page: <a href="http://annie.bii.a-star.edu.sg/">http://annie.bii.a-star.edu.sg/</a><br>Direct link via UniProt ID:<br><a href="http://annie.bii.a-star.edu.sg/annie/query.do?seqid=P04637">http://annie.bii.a-star.edu.sg/annie/query.do?seqid=P04637</a> (p53)                                                                                                                                                                                                                                                                                                                                                                                                                                                                                                                                                                                                                                                                                                                                                                                | (Ooi <i>et al.</i> , 2009)            |

## Supplemental Table S11

### Database resources providing information about protein 3D structure

The example PDB entry “1tup” corresponds to the structure “Tumor suppressor p53 complexed with DNA”.

| Resource                                               | Example web-links                                                                                                                                                                                                                                                                                                                                                                                                                                                                                                                                                                                                                                                                                                                                                                               | Reference                       |
|--------------------------------------------------------|-------------------------------------------------------------------------------------------------------------------------------------------------------------------------------------------------------------------------------------------------------------------------------------------------------------------------------------------------------------------------------------------------------------------------------------------------------------------------------------------------------------------------------------------------------------------------------------------------------------------------------------------------------------------------------------------------------------------------------------------------------------------------------------------------|---------------------------------|
| <i>Summary information about protein structures</i>    |                                                                                                                                                                                                                                                                                                                                                                                                                                                                                                                                                                                                                                                                                                                                                                                                 |                                 |
| RCSB PDB                                               | Home page: <a href="http://www.pdb.org/">http://www.pdb.org/</a><br>Query via UniProt ID:<br><a href="http://www.pdb.org/pdb/search/smart.do?smartSearchSubtype_0=UpAccessionIdQuery&amp;accessionIdList_0=P04637">http://www.pdb.org/pdb/search/smart.do?smartSearchSubtype_0=UpAccessionIdQuery&amp;accessionIdList_0=P04637</a> (p53)<br>Direct link to “Protein Feature View” via UniProt ID:<br><a href="http://www.rcsb.org/pdb/protein/P04637">http://www.rcsb.org/pdb/protein/P04637</a> (p53)<br>Direct link to Structure Summary page via PDB ID:<br><a href="http://www.rcsb.org/pdb/explore/explore.do?structureId=1tup">http://www.rcsb.org/pdb/explore/explore.do?structureId=1tup</a>                                                                                            | (Rose <i>et al.</i> , 2013)     |
| PDB in Europe (PDBe)                                   | Home page: <a href="http://www.ebi.ac.uk/pdbe/">http://www.ebi.ac.uk/pdbe/</a><br>Query via text term (e.g. gene symbol):<br><a href="http://www.ebi.ac.uk/pdbe/searchResults.html?term=TP53">http://www.ebi.ac.uk/pdbe/searchResults.html?term=TP53</a> (p53)<br>Query via any UniProt ID:<br><a href="http://www.ebi.ac.uk/pdbe/searchResults.html?term=P24941">http://www.ebi.ac.uk/pdbe/searchResults.html?term=P24941</a> (Cdk2)<br>Direct link to PDBeView Summary page via PDB ID:<br><a href="http://www.ebi.ac.uk/pdbe-srv/view/entry/1tup/summary.html">http://www.ebi.ac.uk/pdbe-srv/view/entry/1tup/summary.html</a>                                                                                                                                                                | (Gutmanas <i>et al.</i> , 2014) |
| NCBI Molecular Modeling Database (MMDB)                | Home page: <a href="http://www.ncbi.nlm.nih.gov/structure/">http://www.ncbi.nlm.nih.gov/structure/</a><br>Query via text term (e.g. gene symbol):<br><a href="http://www.ncbi.nlm.nih.gov/structure/?term=TP53">http://www.ncbi.nlm.nih.gov/structure/?term=TP53</a> (p53)<br>Direct link to Protein Structure Summary page via PDB ID:<br><a href="http://www.ncbi.nlm.nih.gov/structure/?term=1tup">http://www.ncbi.nlm.nih.gov/structure/?term=1tup</a>                                                                                                                                                                                                                                                                                                                                      | (Madej <i>et al.</i> , 2012)    |
| PDBsum                                                 | Home page: <a href="http://www.ebi.ac.uk/pdbsum/">http://www.ebi.ac.uk/pdbsum/</a><br>Direct link to alignment via UniProt ID:<br><a href="http://www.ebi.ac.uk/thornton-srv/databases/cgi-bin/pdbsum/GetUnichains.pl?uniprot_id=P04637">http://www.ebi.ac.uk/thornton-srv/databases/cgi-bin/pdbsum/GetUnichains.pl?uniprot_id=P04637</a> (p53)<br>Direct link to alignment via UniProt protein name:<br><a href="http://www.ebi.ac.uk/thornton-srv/databases/cgi-bin/pdbsum/GetUnichains.pl?uniprot_code=CHK1_HUMAN">http://www.ebi.ac.uk/thornton-srv/databases/cgi-bin/pdbsum/GetUnichains.pl?uniprot_code=CHK1_HUMAN</a><br>Direct link to “Top page” protein structure and function summary, via PDB ID: <a href="http://www.ebi.ac.uk/pdbsum/1tup">http://www.ebi.ac.uk/pdbsum/1tup</a>   | (de Beer <i>et al.</i> , 2014)  |
| UniPDB                                                 | Home page: <a href="http://www.ebi.ac.uk/pdbe-apps/widgets/unipdb/">http://www.ebi.ac.uk/pdbe-apps/widgets/unipdb/</a><br>Direct link to alignment via UniProt ID:<br><a href="http://www.ebi.ac.uk/pdbe-apps/widgets/unipdb?uniprot=P04637">http://www.ebi.ac.uk/pdbe-apps/widgets/unipdb?uniprot=P04637</a> (p53)<br>Direct link to alignment via UniProt name:<br><a href="http://www.ebi.ac.uk/pdbe/widgets/unipdb?uniprot=CHK1_HUMAN">http://www.ebi.ac.uk/pdbe/widgets/unipdb?uniprot=CHK1_HUMAN</a>                                                                                                                                                                                                                                                                                      | (Gutmanas <i>et al.</i> , 2014) |
| <i>Web-launchable interactive 3D structure viewers</i> |                                                                                                                                                                                                                                                                                                                                                                                                                                                                                                                                                                                                                                                                                                                                                                                                 |                                 |
| Jmol Viewer                                            | Home page: <a href="http://jmol.sourceforge.net/">http://jmol.sourceforge.net/</a><br>User guide: <a href="http://jmol.sourceforge.net/#Learn%20to%20use%20Jmol">http://jmol.sourceforge.net/#Learn%20to%20use%20Jmol</a><br>Direct link to 3D structure in viewer (from RCSB), via PDB ID:<br><a href="http://www.rcsb.org/pdb/explore/jmol.do?structureId=1tup">http://www.rcsb.org/pdb/explore/jmol.do?structureId=1tup</a>                                                                                                                                                                                                                                                                                                                                                                  | (Herraez, 2006)                 |
| Cn3D Viewer                                            | Home page: <a href="http://www.ncbi.nlm.nih.gov/Structure/CN3D/cn3d.shtml">http://www.ncbi.nlm.nih.gov/Structure/CN3D/cn3d.shtml</a><br>Software download and install:<br><a href="http://www.ncbi.nlm.nih.gov/Structure/CN3D/cn3dinstall.shtml">http://www.ncbi.nlm.nih.gov/Structure/CN3D/cn3dinstall.shtml</a><br>Tutorial: <a href="http://www.ncbi.nlm.nih.gov/Structure/CN3D/cn3dtut.shtml">http://www.ncbi.nlm.nih.gov/Structure/CN3D/cn3dtut.shtml</a><br>Direct link to 3D structure in viewer (from MMDB), via PDB ID:<br><a href="http://www.ncbi.nlm.nih.gov/Structure/mmdb/mmdbsrv.cgi?db=t&amp;form=6&amp;uid=1tup&amp;Dopt=i">http://www.ncbi.nlm.nih.gov/Structure/mmdb/mmdbsrv.cgi?db=t&amp;form=6&amp;uid=1tup&amp;Dopt=i</a> (requires the Cn3D program to be pre-installed) | (Wang <i>et al.</i> , 2000)     |
| AstexViewer™                                           | Home page: <a href="http://astx.com/technology/pyramid-platform/#astexviewer">http://astx.com/technology/pyramid-platform/#astexviewer</a><br>Documentation (at PDBe):<br><a href="http://www.ebi.ac.uk/pdbe-srv/view/viewer/ViewerDocumentation.html">http://www.ebi.ac.uk/pdbe-srv/view/viewer/ViewerDocumentation.html</a><br>Direct link to 3D structure in viewer (from PDBe), via PDB ID:<br><a href="http://www.ebi.ac.uk/pdbe-srv/view/entry/1tup/viewer">http://www.ebi.ac.uk/pdbe-srv/view/entry/1tup/viewer</a>                                                                                                                                                                                                                                                                      | (Hartshorn, 2002)               |
| OpenAstexViewer                                        | Home page: <a href="http://openastexviewer.net/web/">http://openastexviewer.net/web/</a><br>User interface guide: <a href="http://openastexviewer.net/web/interface.html">http://openastexviewer.net/web/interface.html</a><br>Direct link to 3D structure in viewer (from PDBe), via PDB ID:<br><a href="http://www.ebi.ac.uk/pdbe-srv/view/entry/1tup/openastex">http://www.ebi.ac.uk/pdbe-srv/view/entry/1tup/openastex</a>                                                                                                                                                                                                                                                                                                                                                                  | (Oldfield, 2004)                |



## Supplemental Table S12

### Database resources providing information about protein interactors

| Resource        | Example web-links                                                                                                                                                                                                                                                                                                                                                                                                                                                                                                                                                                                                                                                                                                                                                                                                                                                                                                                                                                                                                                                                                                                                                                                                                                                                                                                                                                                                                                                                                                                                                                                                                                                                                                                                                                                                                                                                                                                                                                                                                                                                                                                                                                                 | Reference                               |
|-----------------|---------------------------------------------------------------------------------------------------------------------------------------------------------------------------------------------------------------------------------------------------------------------------------------------------------------------------------------------------------------------------------------------------------------------------------------------------------------------------------------------------------------------------------------------------------------------------------------------------------------------------------------------------------------------------------------------------------------------------------------------------------------------------------------------------------------------------------------------------------------------------------------------------------------------------------------------------------------------------------------------------------------------------------------------------------------------------------------------------------------------------------------------------------------------------------------------------------------------------------------------------------------------------------------------------------------------------------------------------------------------------------------------------------------------------------------------------------------------------------------------------------------------------------------------------------------------------------------------------------------------------------------------------------------------------------------------------------------------------------------------------------------------------------------------------------------------------------------------------------------------------------------------------------------------------------------------------------------------------------------------------------------------------------------------------------------------------------------------------------------------------------------------------------------------------------------------------|-----------------------------------------|
| STRING          | <p>Home page: <a href="http://string-db.org/">http://string-db.org/</a></p> <p>Query via text term:<br/> <a href="http://string-db.org/newstring.cgi/show_network_section.pl?identifier=p53">http://string-db.org/newstring.cgi/show_network_section.pl?identifier=p53</a></p> <p>Direct link to interaction diagram via taxonomy code plus gene symbol:<br/> <a href="http://string-db.org/newstring.cgi/show_network_section.pl?species=9606&amp;identifier=CDK1">http://string-db.org/newstring.cgi/show_network_section.pl?species=9606&amp;identifier=CDK1</a></p> <p>Direct link to interaction diagram via (a) Ensembl gene ID (b) UniProt ID:<br/>           (a) <a href="http://string-db.org/newstring.cgi/show_network_section.pl?identifier=ENSG00000156970">http://string-db.org/newstring.cgi/show_network_section.pl?identifier=ENSG00000156970</a><br/>           (b) <a href="http://string-db.org/newstring.cgi/show_network_section.pl?identifier=P14635">http://string-db.org/newstring.cgi/show_network_section.pl?identifier=P14635</a></p> <p>Direct link to interaction diagram via gene IDs for species databases: (c) FlyBase (d) WormBase (e) SGD (f) PomBase:<br/>           (c) <a href="http://string-db.org/newstring.cgi/show_network_section.pl?identifier=FBgn0000147">http://string-db.org/newstring.cgi/show_network_section.pl?identifier=FBgn0000147</a><br/>           (d) <a href="http://string-db.org/newstring.cgi/show_network_section.pl?identifier=K08E3.6">http://string-db.org/newstring.cgi/show_network_section.pl?identifier=K08E3.6</a><br/>           (e) <a href="http://string-db.org/newstring.cgi/show_network_section.pl?identifier=YBR156C">http://string-db.org/newstring.cgi/show_network_section.pl?identifier=YBR156C</a><br/>           (f) <a href="http://string-db.org/newstring.cgi/show_network_section.pl?identifier=SPAC24H6.05">http://string-db.org/newstring.cgi/show_network_section.pl?identifier=SPAC24H6.05</a></p>                                                                                                                                                                                                 | (Franceschini <i>et al.</i> , 2013)     |
| IntAct          | <p>Home page: <a href="http://www.ebi.ac.uk/intact">http://www.ebi.ac.uk/intact</a></p> <p>Direct link via (a) gene symbol (b) Ensembl gene ID (c) UniProt ID:<br/>           (a) <a href="http://www.ebi.ac.uk/intact/pages/interactions/interactions.xhtml?query=TP53">http://www.ebi.ac.uk/intact/pages/interactions/interactions.xhtml?query=TP53</a><br/>           (b) <a href="http://www.ebi.ac.uk/intact/pages/interactions/interactions.xhtml?query=P14635">http://www.ebi.ac.uk/intact/pages/interactions/interactions.xhtml?query=P14635</a><br/>           (c) <a href="http://www.ebi.ac.uk/intact/pages/interactions/interactions.xhtml?query=ENSG00000156970">http://www.ebi.ac.uk/intact/pages/interactions/interactions.xhtml?query=ENSG00000156970</a></p> <p>Direct link via gene IDs for species databases: (d) FlyBase (e) WormBase (f) SGD (g) PomBase (h) TAIR:<br/>           (d) <a href="http://www.ebi.ac.uk/intact/pages/interactions/interactions.xhtml?query=FBgn0000147">http://www.ebi.ac.uk/intact/pages/interactions/interactions.xhtml?query=FBgn0000147</a><br/>           (e) <a href="http://www.ebi.ac.uk/intact/pages/interactions/interactions.xhtml?query=K08E3.6">http://www.ebi.ac.uk/intact/pages/interactions/interactions.xhtml?query=K08E3.6</a><br/>           (f) <a href="http://www.ebi.ac.uk/intact/pages/interactions/interactions.xhtml?query=YBR156C">http://www.ebi.ac.uk/intact/pages/interactions/interactions.xhtml?query=YBR156C</a><br/>           (g) <a href="http://www.ebi.ac.uk/intact/pages/interactions/interactions.xhtml?query=SPAC24H6.05">http://www.ebi.ac.uk/intact/pages/interactions/interactions.xhtml?query=SPAC24H6.05</a><br/>           (h) <a href="http://www.ebi.ac.uk/intact/pages/interactions/interactions.xhtml?query=AT1G15570">http://www.ebi.ac.uk/intact/pages/interactions/interactions.xhtml?query=AT1G15570</a></p>                                                                                                                                                                                                                                                                              | (Kerrien <i>et al.</i> , 2012)          |
| BioGRID         | <p>Home page: <a href="http://thebiogrid.org/">http://thebiogrid.org/</a></p> <p>Query via text (e.g. gene symbol):<br/> <a href="http://thebiogrid.org/search.php?search=TP53">http://thebiogrid.org/search.php?search=TP53</a> (p53)</p> <p>Direct link via sequence IDs: (a) Ensembl gene ID (b) RefSeq mRNA (c) RefSeq protein (d) UniProt:<br/>           (a) <a href="http://thebiogrid.org/search.php?search=ENSMUSG00000019942">http://thebiogrid.org/search.php?search=ENSMUSG00000019942</a> (Cdk1)<br/>           (b) <a href="http://thebiogrid.org/search.php?search=NM_001790">http://thebiogrid.org/search.php?search=NM_001790</a><br/>           (c) <a href="http://thebiogrid.org/search.php?search=NP_035145">http://thebiogrid.org/search.php?search=NP_035145</a><br/>           (d) <a href="http://thebiogrid.org/search.php?search=Q96GD4">http://thebiogrid.org/search.php?search=Q96GD4</a></p> <p>Direct link via gene IDs for species databases: (e) NCBI gene (f) FlyBase (g) WormBase (h) SGD (i) PomBase (j) TAIR (k) dictyBase (l) ZFIN:<br/>           (e) <a href="http://thebiogrid.org/search.php?search=1111">http://thebiogrid.org/search.php?search=1111</a><br/>           (f) <a href="http://thebiogrid.org/search.php?search=FBgn0000147">http://thebiogrid.org/search.php?search=FBgn0000147</a><br/>           (g) <a href="http://thebiogrid.org/search.php?search=K08E3.6">http://thebiogrid.org/search.php?search=K08E3.6</a><br/>           (h) <a href="http://thebiogrid.org/search.php?search=YBR156C">http://thebiogrid.org/search.php?search=YBR156C</a><br/>           (i) <a href="http://thebiogrid.org/search.php?search=SPAC24H6.05">http://thebiogrid.org/search.php?search=SPAC24H6.05</a><br/>           (j) <a href="http://thebiogrid.org/search.php?search=AT5G24280">http://thebiogrid.org/search.php?search=AT5G24280</a><br/>           (k) <a href="http://thebiogrid.org/search.php?search=DDB_G0272813">http://thebiogrid.org/search.php?search=DDB_G0272813</a><br/>           (l) <a href="http://thebiogrid.org/search.php?search=ZDB-GENE-010320-1">http://thebiogrid.org/search.php?search=ZDB-GENE-010320-1</a></p> | (Chatr-Aryamontri <i>et al.</i> , 2013) |
| IMEx Consortium | <p>Home page: <a href="http://www.imexconsortium.org/">http://www.imexconsortium.org/</a></p> <p>Cross-database query via (a) gene symbol (b) UniProt ID:<br/>           (a) <a href="http://www.ebi.ac.uk/intact/imex/main.xhtml?query=TP53">http://www.ebi.ac.uk/intact/imex/main.xhtml?query=TP53</a><br/>           (b) <a href="http://www.ebi.ac.uk/intact/imex/main.xhtml?query=P11440">http://www.ebi.ac.uk/intact/imex/main.xhtml?query=P11440</a> (Cdk1)</p>                                                                                                                                                                                                                                                                                                                                                                                                                                                                                                                                                                                                                                                                                                                                                                                                                                                                                                                                                                                                                                                                                                                                                                                                                                                                                                                                                                                                                                                                                                                                                                                                                                                                                                                            | (Orchard <i>et al.</i> , 2012)          |



## Supplemental Table S13

### Database resources providing information about protein post-translational modifications

| Resource        | Example web-links                                                                                                                                                                                                                                                                                                                                                                                                                                                                                                                                               | Reference                            |
|-----------------|-----------------------------------------------------------------------------------------------------------------------------------------------------------------------------------------------------------------------------------------------------------------------------------------------------------------------------------------------------------------------------------------------------------------------------------------------------------------------------------------------------------------------------------------------------------------|--------------------------------------|
| PhosphoSitePlus | Home page: <a href="http://www.phosphosite.org/">http://www.phosphosite.org/</a><br>Query via text term:<br><a href="http://www.phosphosite.org/simpleSearchSubmitAction.do?queryId=-1&amp;from=0&amp;searchStr=sororin">http://www.phosphosite.org/simpleSearchSubmitAction.do?queryId=-1&amp;from=0&amp;searchStr=sororin</a><br>Direct link via UniProt ID:<br><a href="http://www.phosphosite.org/uniprotAccAction.do?id=P04637">http://www.phosphosite.org/uniprotAccAction.do?id=P04637</a> (p53)                                                         | (Hornbeck <i>et al.</i> , 2012)      |
| Phospho.ELM     | Home page: <a href="http://phospho.elm.eu.org/">http://phospho.elm.eu.org/</a><br>Direct link via Ensembl protein ID:<br><a href="http://phospho.elm.eu.org/byAccession/ENSP00000269305">http://phospho.elm.eu.org/byAccession/ENSP00000269305</a> (p53)<br>Direct link via UniProt ID:<br><a href="http://phospho.elm.eu.org/byAccession/P06493">http://phospho.elm.eu.org/byAccession/P06493</a> (Cdk1)<br>Direct link via UniProt name:<br><a href="http://phospho.elm.eu.org/byAccession/CASP9_HUMAN">http://phospho.elm.eu.org/byAccession/CASP9_HUMAN</a> | (Dinkel <i>et al.</i> , 2011)        |
| PHOSIDA         | Home page: <a href="http://www.phosida.com/">http://www.phosida.com/</a><br>Query via UniProt ID:<br><a href="http://141.61.102.18/phosida/index.aspx?query=P04637">http://141.61.102.18/phosida/index.aspx?query=P04637</a> (p53)                                                                                                                                                                                                                                                                                                                              | (Gnad <i>et al.</i> , 2011)          |
| UbiProt         | Home page: <a href="http://ubiprot.org.ru/">http://ubiprot.org.ru/</a><br>Direct link via UniProt ID:<br><a href="http://ubiprot.org.ru/index.php?mode=proteins_show&amp;spac=Q9Y6K9">http://ubiprot.org.ru/index.php?mode=proteins_show&amp;spac=Q9Y6K9</a>                                                                                                                                                                                                                                                                                                    | (Chernorudskiy <i>et al.</i> , 2007) |
| dbPTM           | Home page: <a href="http://dbptm.mbc.nctu.edu.tw/">http://dbptm.mbc.nctu.edu.tw/</a><br>Direct link via UniProt protein name:<br><a href="http://dbptm.mbc.nctu.edu.tw/search_result.php?search_type=db_id&amp;swiss_id=P53_HUMAN">http://dbptm.mbc.nctu.edu.tw/search_result.php?search_type=db_id&amp;swiss_id=P53_HUMAN</a> (p53)                                                                                                                                                                                                                            | (Lu <i>et al.</i> , 2013)            |

## Supplemental Table S14

### Database resources: variations and mutations in genes and proteins

| Resource        | Example web-links                                                                                                                                                                                                                                                                                                                                                                                                                                                                                                                                                                                                                                                                                                                                                                                                                                                                                                                                                                                                                                                                                                                                                                                                                                                                                                                                                                                                                                                   | Reference                     |
|-----------------|---------------------------------------------------------------------------------------------------------------------------------------------------------------------------------------------------------------------------------------------------------------------------------------------------------------------------------------------------------------------------------------------------------------------------------------------------------------------------------------------------------------------------------------------------------------------------------------------------------------------------------------------------------------------------------------------------------------------------------------------------------------------------------------------------------------------------------------------------------------------------------------------------------------------------------------------------------------------------------------------------------------------------------------------------------------------------------------------------------------------------------------------------------------------------------------------------------------------------------------------------------------------------------------------------------------------------------------------------------------------------------------------------------------------------------------------------------------------|-------------------------------|
| dbSNP and dbVar | <p>Home page (dbSNP): <a href="http://www.ncbi.nlm.nih.gov/SNP/">http://www.ncbi.nlm.nih.gov/SNP/</a></p> <p>Home page (dbVar): <a href="http://www.ncbi.nlm.nih.gov/dbvar/">http://www.ncbi.nlm.nih.gov/dbvar/</a></p> <p>Direct link to dbVar table via gene symbol:<br/><a href="http://www.ncbi.nlm.nih.gov/dbvar/?term=TP53[Gene]">http://www.ncbi.nlm.nih.gov/dbvar/?term=TP53[Gene]</a> (human p53)</p> <p>Direct link to Variation Viewer via gene symbol:<br/><a href="http://www.ncbi.nlm.nih.gov/sites/varvu?gene=TP53">http://www.ncbi.nlm.nih.gov/sites/varvu?gene=TP53</a> (human p53)</p> <p>Direct link to Variation Viewer via NCBI GeneID:<br/><a href="http://www.ncbi.nlm.nih.gov/sites/varvu?gene=983">http://www.ncbi.nlm.nih.gov/sites/varvu?gene=983</a> (human Cdk1)</p>                                                                                                                                                                                                                                                                                                                                                                                                                                                                                                                                                                                                                                                                   | (NCBI, 2014)                  |
| Ensembl         | <p>Home page: <a href="http://www.ensembl.org/">http://www.ensembl.org/</a></p> <p>“About Ensembl Variation” documentation page:<br/><a href="http://www.ensembl.org/info/docs/variation/index.html">http://www.ensembl.org/info/docs/variation/index.html</a></p> <p>Direct link to Variation Table, via species name and gene symbol:<br/><a href="http://www.ensembl.org/H_sapiens/Gene/Variation_Gene/Table?g=CFTR">http://www.ensembl.org/H_sapiens/Gene/Variation_Gene/Table?g=CFTR</a></p> <p>Direct link to Variation Table, via species name and UniProt ID:<br/><a href="http://www.ensembl.org/M_musculus/Gene/Variation_Gene/Table?g=P11440">http://www.ensembl.org/M_musculus/Gene/Variation_Gene/Table?g=P11440</a></p> <p>Direct link to Variation Table, via Ensembl gene ID:<br/><a href="http://www.ensembl.org/Gene/Variation_Gene/Table?g=ENSG00000141510">http://www.ensembl.org/Gene/Variation_Gene/Table?g=ENSG00000141510</a> (human p53)</p> <p>Direct link to Variation Table, via Ensembl transcript ID:<br/><a href="http://www.ensembl.org/Gene/Variation_Gene/Table?g=ENSMUST00000020099">http://www.ensembl.org/Gene/Variation_Gene/Table?g=ENSMUST00000020099</a> (mouse Cdk1)</p> <p>Direct link to Variation Table, via Ensembl protein ID:<br/><a href="http://www.ensembl.org/Gene/Variation_Gene/Table?g=ENSGALP00000012408">http://www.ensembl.org/Gene/Variation_Gene/Table?g=ENSGALP00000012408</a> (chicken DNA pol ε)</p> | (Flicek <i>et al.</i> , 2014) |
| UniProt         | <p>Home page: <a href="http://www.uniprot.org/">http://www.uniprot.org/</a></p> <p>UniProt manual “Natural Variant” page:<br/><a href="http://www.uniprot.org/manual/variant">http://www.uniprot.org/manual/variant</a></p> <p>Search for reviewed entries via species plus gene name:<br/><a href="http://www.uniprot.org/uniprot/?query=reviewed%3Ayes+Mus+musculus+gene:tp53">http://www.uniprot.org/uniprot/?query=reviewed%3Ayes+Mus+musculus+gene:tp53</a></p> <p>Search for reviewed entries via species plus any ID:<br/><a href="http://www.uniprot.org/uniprot/?query=reviewed%3Ayes+Mus+musculus+NM_001127259">http://www.uniprot.org/uniprot/?query=reviewed%3Ayes+Mus+musculus+NM_001127259</a></p> <p>Direct link to “Sequence annotation (Features)” section, via UniProt ID:<br/><a href="http://www.uniprot.org/uniprot/P04637#section_features">http://www.uniprot.org/uniprot/P04637#section_features</a> (human p53)</p>                                                                                                                                                                                                                                                                                                                                                                                                                                                                                                                        | (UniProt, 2014)               |

## Supplemental Table S15

### Database resources: genetic association with human disease

| Resource                                   | Example web-links                                                                                                                                                                                                                                                                                                                                                                                                                                                                                                                                                                                                                                                                                                                                                                                                                                                                                                                                                                                                                                                                                                                                                                                                                                                                                                                                                                                                                                                                                                                                                                                                                                                      | Reference                       |
|--------------------------------------------|------------------------------------------------------------------------------------------------------------------------------------------------------------------------------------------------------------------------------------------------------------------------------------------------------------------------------------------------------------------------------------------------------------------------------------------------------------------------------------------------------------------------------------------------------------------------------------------------------------------------------------------------------------------------------------------------------------------------------------------------------------------------------------------------------------------------------------------------------------------------------------------------------------------------------------------------------------------------------------------------------------------------------------------------------------------------------------------------------------------------------------------------------------------------------------------------------------------------------------------------------------------------------------------------------------------------------------------------------------------------------------------------------------------------------------------------------------------------------------------------------------------------------------------------------------------------------------------------------------------------------------------------------------------------|---------------------------------|
| UniProt                                    | Home page: <a href="http://www.uniprot.org/">http://www.uniprot.org/</a><br>Search for reviewed human entries via any term (text or ID):<br><a href="http://www.uniprot.org/uniprot/?query=reviewed:yes+9606+Bcr-Abl">http://www.uniprot.org/uniprot/?query=reviewed:yes+9606+Bcr-Abl</a><br>Link to “General annotation (Comments)” section via UniProt ID (see “Involvement in disease” subsection):<br><a href="http://www.uniprot.org/uniprot/P04637#section_comments">http://www.uniprot.org/uniprot/P04637#section_comments</a> (p53)                                                                                                                                                                                                                                                                                                                                                                                                                                                                                                                                                                                                                                                                                                                                                                                                                                                                                                                                                                                                                                                                                                                            | (UniProt, 2014)                 |
| Online Mendelian Inheritance in Man (OMIM) | Home page: <a href="http://omim.org/">http://omim.org/</a><br>Query via (a) any text term (b) gene symbol:<br>(a) <a href="http://omim.org/search?search=Bloom">http://omim.org/search?search=Bloom</a><br>(b) <a href="http://omim.org/search?search=approved_gene_symbol:MZT1">http://omim.org/search?search=approved_gene_symbol:MZT1</a><br>Query via human IDs: (c) NCBI gene (d) Ensembl gene or transcript (f) NCBI nucleotide GI number (g) UniProt:<br>(c) <a href="http://omim.org/search?search=gene_id:7157">http://omim.org/search?search=gene_id:7157</a> (p53)<br>(d) <a href="http://omim.org/search?search=ensembl_id:ENSG00000183765">http://omim.org/search?search=ensembl_id:ENSG00000183765</a><br>(e) <a href="http://omim.org/search?search=ncbi_reference_sequence:345525417">http://omim.org/search?search=ncbi_reference_sequence:345525417</a><br>(f) <a href="http://omim.org/search?search=swiss_prot_id:O96017">http://omim.org/search?search=swiss_prot_id:O96017</a><br>Query via gene IDs for non-human orthologues, from: (g) mouse (h) zebrafish (i) <i>C. elegans</i> (j) <i>Drosophila</i> :<br>(g) <a href="http://omim.org/search?search=mgi_id:MGI:88351">http://omim.org/search?search=mgi_id:MGI:88351</a> (Cdk1)<br>(h) <a href="http://omim.org/search?search=zfin_id:ZDB-GENE-010320-1">http://omim.org/search?search=zfin_id:ZDB-GENE-010320-1</a><br>(i) <a href="http://omim.org/search?search=wormbase_id:WBGene00000405">http://omim.org/search?search=wormbase_id:WBGene00000405</a><br>(j) <a href="http://omim.org/search?search=flybase_id:FBgn0004106">http://omim.org/search?search=flybase_id:FBgn0004106</a> | (Amberger <i>et al.</i> , 2011) |
| KEGG                                       | <i>KEGG GENES</i><br>Home page: <a href="http://www.genome.jp/kegg/genes.html">http://www.genome.jp/kegg/genes.html</a><br>Direct link via (a) NCBI gene ID (b) gene symbol:<br>(a) <a href="http://www.genome.jp/dbget-bin/www_bget?hsa:7157">http://www.genome.jp/dbget-bin/www_bget?hsa:7157</a> (p53)<br>(b) <a href="http://www.genome.jp/dbget-bin/www_bget?hsa:APC">http://www.genome.jp/dbget-bin/www_bget?hsa:APC</a><br><i>KEGG DISEASE</i><br>Home page: <a href="http://www.genome.jp/kegg/disease/">http://www.genome.jp/kegg/disease/</a><br>Query via text term (e.g. gene symbol):<br><a href="http://www.kegg.jp/medicus-bin/search?display=disease&amp;q=CFTR">http://www.kegg.jp/medicus-bin/search?display=disease&amp;q=CFTR</a>                                                                                                                                                                                                                                                                                                                                                                                                                                                                                                                                                                                                                                                                                                                                                                                                                                                                                                                  | (Kanehisa <i>et al.</i> , 2014) |
| Genetic Association Database (GAD)         | Home page: <a href="http://geneticassociationdb.nih.gov/">http://geneticassociationdb.nih.gov/</a><br>Direct link to disease-association table via gene symbol:<br><a href="http://geneticassociationdb.nih.gov/cgi-bin/tableview.cgi?associa=Y&amp;cond=gene='TP53'">http://geneticassociationdb.nih.gov/cgi-bin/tableview.cgi?associa=Y&amp;cond=gene='TP53'</a> (p53)<br>Direct link to disease-association table via NCBI Gene ID:<br><a href="http://geneticassociationdb.nih.gov/cgi-bin/tableview.cgi?associa=Y&amp;cond=LOCUSNUM=675">http://geneticassociationdb.nih.gov/cgi-bin/tableview.cgi?associa=Y&amp;cond=LOCUSNUM=675</a>                                                                                                                                                                                                                                                                                                                                                                                                                                                                                                                                                                                                                                                                                                                                                                                                                                                                                                                                                                                                                            | (Becker <i>et al.</i> , 2004)   |
| Comparative Toxicogenomics Database (CTD)  | Home page: <a href="http://ctdbase.org/">http://ctdbase.org/</a><br>Direct link to gene record via gene symbol (need to click on “Diseases” tab):<br><a href="http://ctdbase.org/basicQuery.go?bqCat=gene&amp;bq=name:TP53">http://ctdbase.org/basicQuery.go?bqCat=gene&amp;bq=name:TP53</a> (p53)<br>Direct link to disease-association table via NCBI gene ID:<br><a href="http://ctdbase.org/detail.go?type=gene&amp;view=disease&amp;acc=7157">http://ctdbase.org/detail.go?type=gene&amp;view=disease&amp;acc=7157</a> (p53)                                                                                                                                                                                                                                                                                                                                                                                                                                                                                                                                                                                                                                                                                                                                                                                                                                                                                                                                                                                                                                                                                                                                      | (Davis <i>et al.</i> , 2013)    |
| ClinVar                                    | Home page: <a href="http://www.ncbi.nlm.nih.gov/clinvar/">http://www.ncbi.nlm.nih.gov/clinvar/</a><br>Direct link to variation table via (a) gene symbol (b) NCBI gene ID:<br>(a) <a href="http://www.ncbi.nlm.nih.gov/clinvar/?term=TP53[gene]">http://www.ncbi.nlm.nih.gov/clinvar/?term=TP53[gene]</a> (p53)<br>(b) <a href="http://www.ncbi.nlm.nih.gov/clinvar/?term=11200[GeneID]">http://www.ncbi.nlm.nih.gov/clinvar/?term=11200[GeneID]</a>                                                                                                                                                                                                                                                                                                                                                                                                                                                                                                                                                                                                                                                                                                                                                                                                                                                                                                                                                                                                                                                                                                                                                                                                                   | (Landrum <i>et al.</i> , 2014)  |
| DECIPHER ( <i>development</i> )            | Home page: <a href="https://decipher.sanger.ac.uk/">https://decipher.sanger.ac.uk/</a><br>Query via text term: <a href="https://decipher.sanger.ac.uk/search?q=FANCD2">https://decipher.sanger.ac.uk/search?q=FANCD2</a>                                                                                                                                                                                                                                                                                                                                                                                                                                                                                                                                                                                                                                                                                                                                                                                                                                                                                                                                                                                                                                                                                                                                                                                                                                                                                                                                                                                                                                               | (Bragin <i>et al.</i> , 2014)   |
| COSMIC ( <i>cancer</i> )                   | Home page: <a href="http://cancer.sanger.ac.uk/cancergenome/projects/cosmic/">http://cancer.sanger.ac.uk/cancergenome/projects/cosmic/</a><br>Direct link to overview page via human gene symbol:<br><a href="http://cancer.sanger.ac.uk/cosmic/gene/overview?ln=APC">http://cancer.sanger.ac.uk/cosmic/gene/overview?ln=APC</a><br>Query via human (a) Ensembl gene (b) UniProt ID:<br>(a) <a href="http://cancer.sanger.ac.uk/cosmic/gene/overview?ln=ENSG00000183765">http://cancer.sanger.ac.uk/cosmic/gene/overview?ln=ENSG00000183765</a><br>(b) <a href="http://cancer.sanger.ac.uk/cosmic/search?q=P04637">http://cancer.sanger.ac.uk/cosmic/search?q=P04637</a> (p53)                                                                                                                                                                                                                                                                                                                                                                                                                                                                                                                                                                                                                                                                                                                                                                                                                                                                                                                                                                                         | (Forbes <i>et al.</i> , 2011)   |
| dbDEPC ( <i>cancer</i> )                   | Home page: <a href="http://lifecenter.sgst.cn/dbdepc/index.do">http://lifecenter.sgst.cn/dbdepc/index.do</a><br>Direct link via UniProt ID:<br><a href="http://lifecenter.sgst.cn/dbdepc/detailProtein.do?uniprotKB=P04637">http://lifecenter.sgst.cn/dbdepc/detailProtein.do?uniprotKB=P04637</a>                                                                                                                                                                                                                                                                                                                                                                                                                                                                                                                                                                                                                                                                                                                                                                                                                                                                                                                                                                                                                                                                                                                                                                                                                                                                                                                                                                     | (He <i>et al.</i> , 2012)       |

## Supplemental Table S16

### Database resources providing information on drugs and inhibitors

| Resource                                                                       | Example web-links                                                                                                                                                                                                                                                                                                                                                                                                                                                                                                                                                                                                                                                                                                                                                                                                                                                        | Reference                     |
|--------------------------------------------------------------------------------|--------------------------------------------------------------------------------------------------------------------------------------------------------------------------------------------------------------------------------------------------------------------------------------------------------------------------------------------------------------------------------------------------------------------------------------------------------------------------------------------------------------------------------------------------------------------------------------------------------------------------------------------------------------------------------------------------------------------------------------------------------------------------------------------------------------------------------------------------------------------------|-------------------------------|
| <i>Databases searchable by target IDs</i>                                      |                                                                                                                                                                                                                                                                                                                                                                                                                                                                                                                                                                                                                                                                                                                                                                                                                                                                          |                               |
| ChEMBL                                                                         | Home page: <a href="https://www.ebi.ac.uk/chembl/">https://www.ebi.ac.uk/chembl/</a><br><i>Options for ChEMBL target-based searching include:</i><br>(a) via the ChEMBL home page: paste the hit ID into the search box, click [Targets], then the ChEMBL ID corresponding to the relevant gene product.<br>(b) within a UniProt entry: go to the Cross-references / Chemistry section, then click the ChEMBL link.<br>In the Target Report Card, under Target Associated Bioactivities click the desired property in the pie-chart to show a table of relevant compounds.                                                                                                                                                                                                                                                                                               | (Bento <i>et al.</i> , 2014)  |
| DrugBank                                                                       | Home page: <a href="http://drugbank.ca/">http://drugbank.ca/</a><br>Search for drug targets via (a) gene name (b) UniProt name (c) UniProt ID:<br>(a) <a href="http://www.drugbank.ca/search?utf8=%E2%9C%93&amp;search_type=target_s&amp;query=ABL1">http://www.drugbank.ca/search?utf8=%E2%9C%93&amp;search_type=target_s&amp;query=ABL1</a><br>(b) <a href="http://www.drugbank.ca/search?utf8=%E2%9C%93&amp;search_type=target_s&amp;query=CHK1_HUMAN">http://www.drugbank.ca/search?utf8=%E2%9C%93&amp;search_type=target_s&amp;query=CHK1_HUMAN</a><br>(c) <a href="http://www.drugbank.ca/search?utf8=%E2%9C%93&amp;search_type=target_s&amp;query=A9UF02">http://www.drugbank.ca/search?utf8=%E2%9C%93&amp;search_type=target_s&amp;query=A9UF02</a><br>At the Search Results page, click the button corresponding to the relevant gene product (starting BE...). | (Law <i>et al.</i> , 2014)    |
| Comparative Toxicogenomics Database (CTD)                                      | Home page: <a href="http://ctdbase.org/">http://ctdbase.org/</a><br>Direct link to gene record, showing the ten “Top Interacting Chemicals”, via (a) gene symbol, (b) NCBI Gene ID:<br>(a) <a href="http://ctdbase.org/basicQuery.go?bqCat=gene&amp;bq=name:ABL1">http://ctdbase.org/basicQuery.go?bqCat=gene&amp;bq=name:ABL1</a><br>(b) <a href="http://ctdbase.org/detail.go?type=gene&amp;acc=983">http://ctdbase.org/detail.go?type=gene&amp;acc=983</a> (Cdk1)<br>Direct link to “Chemical Interactions” table (sorted by decreasing number of references) via NCBI Gene ID:<br><a href="http://ctdbase.org/detail.go?sort=refSort&amp;view=ixn&amp;type=gene&amp;acc=983">http://ctdbase.org/detail.go?sort=refSort&amp;view=ixn&amp;type=gene&amp;acc=983</a> (Cdk1)                                                                                             | (Davis <i>et al.</i> , 2013)  |
| canSAR                                                                         | Home page: <a href="https://cansar.icr.ac.uk/">https://cansar.icr.ac.uk/</a><br>Direct link to “Molecular Target Synopsis – Chemistry” page, via UniProt ID:<br><a href="https://cansar.icr.ac.uk/cansar/molecular-targets/target_report_chemistry/P04637/">https://cansar.icr.ac.uk/cansar/molecular-targets/target_report_chemistry/P04637/</a>                                                                                                                                                                                                                                                                                                                                                                                                                                                                                                                        | (Bulusu <i>et al.</i> , 2014) |
| PubChem BioAssay                                                               | Home page: <a href="http://www.ncbi.nlm.nih.gov/pcassay/">http://www.ncbi.nlm.nih.gov/pcassay/</a><br>Query via (a) gene symbol (b) UniProt ID (c) protein GI number:<br>(a) <a href="http://www.ncbi.nlm.nih.gov/pcassay?term=ABL[GeneSymbol]">http://www.ncbi.nlm.nih.gov/pcassay?term=ABL[GeneSymbol]</a><br>(b) <a href="http://www.ncbi.nlm.nih.gov/pcassay?term=Q96GD4">http://www.ncbi.nlm.nih.gov/pcassay?term=Q96GD4</a><br>(c) <a href="http://www.ncbi.nlm.nih.gov/pcassay/?term=85681908[GI]">http://www.ncbi.nlm.nih.gov/pcassay/?term=85681908[GI]</a>                                                                                                                                                                                                                                                                                                     | (Wang <i>et al.</i> , 2014)   |
| <i>Other databases of compounds and pharmaceuticals</i>                        |                                                                                                                                                                                                                                                                                                                                                                                                                                                                                                                                                                                                                                                                                                                                                                                                                                                                          |                               |
| PubChem Compound                                                               | Home page: <a href="http://www.ncbi.nlm.nih.gov/pccompound/">http://www.ncbi.nlm.nih.gov/pccompound/</a><br>Query via text term ( <i>note: search results may not necessarily be drugs targeting the queried term</i> ):<br><a href="http://www.ncbi.nlm.nih.gov/pccompound?term=CDK1">http://www.ncbi.nlm.nih.gov/pccompound?term=CDK1</a>                                                                                                                                                                                                                                                                                                                                                                                                                                                                                                                              | (Wang <i>et al.</i> , 2009)   |
| Harvester Chemical                                                             | Home page: <a href="http://harvester.kit.edu/jss/special/chemical?searchTerm=">http://harvester.kit.edu/jss/special/chemical?searchTerm=</a><br>Query via any text term (e.g. gene name):<br><a href="http://harvester.kit.edu/jss/special/chemical?searchTerm=CDK1">http://harvester.kit.edu/jss/special/chemical?searchTerm=CDK1</a>                                                                                                                                                                                                                                                                                                                                                                                                                                                                                                                                   |                               |
| <i>Druggability prediction</i>                                                 |                                                                                                                                                                                                                                                                                                                                                                                                                                                                                                                                                                                                                                                                                                                                                                                                                                                                          |                               |
| DrugEBility                                                                    | Home page: <a href="https://www.ebi.ac.uk/chembl/drugability/">https://www.ebi.ac.uk/chembl/drugability/</a><br>Direct link to protein page with druggability scores, via UniProt ID:<br><a href="https://www.ebi.ac.uk/chembl/drugability/protein/P00519">https://www.ebi.ac.uk/chembl/drugability/protein/P00519</a>                                                                                                                                                                                                                                                                                                                                                                                                                                                                                                                                                   |                               |
| canSAR                                                                         | Home page: <a href="https://cansar.icr.ac.uk/">https://cansar.icr.ac.uk/</a><br>Direct link to “Molecular Target Synopsis – Druggability” page, via UniProt ID:<br><a href="https://cansar.icr.ac.uk/cansar/molecular-targets/target_report_druggability/P04637/">https://cansar.icr.ac.uk/cansar/molecular-targets/target_report_druggability/P04637/</a>                                                                                                                                                                                                                                                                                                                                                                                                                                                                                                               | (Bulusu <i>et al.</i> , 2014) |
| <i>Prediction of docking interactions between proteins and small molecules</i> |                                                                                                                                                                                                                                                                                                                                                                                                                                                                                                                                                                                                                                                                                                                                                                                                                                                                          |                               |
| Drugable                                                                       | Home page: <a href="http://drugable.com/">http://drugable.com/</a><br>Query via text term (e.g. gene symbol):<br><a href="http://drugable.com/search?query=ABL1">http://drugable.com/search?query=ABL1</a><br>Direct link via UniProt ID:<br><a href="http://drugable.com/search?query=P00519">http://drugable.com/search?query=P00519</a>                                                                                                                                                                                                                                                                                                                                                                                                                                                                                                                               | (Reardon, 2013)               |

## Supplemental Table S17

### Resources providing cross-database searches

| Resource                                                                                             | Example web-links                                                                                                                                                                                                                                                                                                                                                                                                                                                                                                                                                                                                                                                                                                                                                                                                                                                                                                                                                                                                                                                                                                                                                                                                                                                                                                                                                                                                                                                                                                                                                                                                                                                                                                                                                                                                                                                                                                                                                                                                                                                                | Reference                       |
|------------------------------------------------------------------------------------------------------|----------------------------------------------------------------------------------------------------------------------------------------------------------------------------------------------------------------------------------------------------------------------------------------------------------------------------------------------------------------------------------------------------------------------------------------------------------------------------------------------------------------------------------------------------------------------------------------------------------------------------------------------------------------------------------------------------------------------------------------------------------------------------------------------------------------------------------------------------------------------------------------------------------------------------------------------------------------------------------------------------------------------------------------------------------------------------------------------------------------------------------------------------------------------------------------------------------------------------------------------------------------------------------------------------------------------------------------------------------------------------------------------------------------------------------------------------------------------------------------------------------------------------------------------------------------------------------------------------------------------------------------------------------------------------------------------------------------------------------------------------------------------------------------------------------------------------------------------------------------------------------------------------------------------------------------------------------------------------------------------------------------------------------------------------------------------------------|---------------------------------|
| GQuery Cross-database search                                                                         | Home page: <a href="http://www.ncbi.nlm.nih.gov/sites/gquery/">http://www.ncbi.nlm.nih.gov/sites/gquery/</a><br>Query all NCBI databases via any search term:<br><a href="http://www.ncbi.nlm.nih.gov/sites/gquery?term=TP53">http://www.ncbi.nlm.nih.gov/sites/gquery?term=TP53</a>                                                                                                                                                                                                                                                                                                                                                                                                                                                                                                                                                                                                                                                                                                                                                                                                                                                                                                                                                                                                                                                                                                                                                                                                                                                                                                                                                                                                                                                                                                                                                                                                                                                                                                                                                                                             | (NCBI, 2014)                    |
| EBI Search (EB-eye)                                                                                  | Home page: <a href="http://www.ebi.ac.uk/ebisearch/">http://www.ebi.ac.uk/ebisearch/</a><br>Query via any search term, e.g. (a) gene symbol (b) Ensembl gene (c) RefSeq nucleotide (d) RefSeq protein (e) UniProt ID:<br>(a) <a href="http://www.ebi.ac.uk/ebisearch/search.ebi?db=allebi&amp;query=TP53">http://www.ebi.ac.uk/ebisearch/search.ebi?db=allebi&amp;query=TP53</a> (p53)<br>(b) <a href="http://www.ebi.ac.uk/ebisearch/search.ebi?db=allebi&amp;query=ENSG00000156970">http://www.ebi.ac.uk/ebisearch/search.ebi?db=allebi&amp;query=ENSG00000156970</a><br>(c) <a href="http://www.ebi.ac.uk/ebisearch/search.ebi?db=allebi&amp;query=NM_004153">http://www.ebi.ac.uk/ebisearch/search.ebi?db=allebi&amp;query=NM_004153</a><br>(d) <a href="http://www.ebi.ac.uk/ebisearch/search.ebi?db=allebi&amp;query=NP_009125">http://www.ebi.ac.uk/ebisearch/search.ebi?db=allebi&amp;query=NP_009125</a><br>(e) <a href="http://www.ebi.ac.uk/ebisearch/search.ebi?db=allebi&amp;query=Q9H410">http://www.ebi.ac.uk/ebisearch/search.ebi?db=allebi&amp;query=Q9H410</a>                                                                                                                                                                                                                                                                                                                                                                                                                                                                                                                                                                                                                                                                                                                                                                                                                                                                                                                                                                                                 | (Valentin <i>et al.</i> , 2010) |
| Bioinformatic Harvester<br><br><i>5 species:</i><br>human, mouse, rat, zebrafish, <i>Arabidopsis</i> | Home page: <a href="http://harvester.kit.edu/">http://harvester.kit.edu/</a><br>Query across five species via any text term:<br><a href="http://harvester.kit.edu:8080/yacysearch.html?query=TP53">http://harvester.kit.edu:8080/yacysearch.html?query=TP53</a> (p53)<br>Query via any gene, transcript or protein ID from the five species, e.g. (a) <i>Arabidopsis</i> gene (b) Ensembl gene (c) RefSeq nucleotide (d) UniProt ID:<br>(a) <a href="http://harvester.kit.edu:8080/yacysearch.html?query=AT5G24280">http://harvester.kit.edu:8080/yacysearch.html?query=AT5G24280</a><br>(b) <a href="http://harvester.kit.edu:8080/yacysearch.html?query=ENSMUSG00000019942">http://harvester.kit.edu:8080/yacysearch.html?query=ENSMUSG00000019942</a> (mouse Cdk1)<br>(c) <a href="http://harvester.kit.edu:8080/yacysearch.html?query=NM_004153">http://harvester.kit.edu:8080/yacysearch.html?query=NM_004153</a><br>(d) <a href="http://harvester.kit.edu:8080/yacysearch.html?query=Q9H410">http://harvester.kit.edu:8080/yacysearch.html?query=Q9H410</a><br>Query via <i>species</i> plus gene term:<br><a href="http://harvester.kit.edu:8080/yacysearch.html?query=mus+musculus+Mcm8">http://harvester.kit.edu:8080/yacysearch.html?query=mus+musculus+Mcm8</a><br>Direct link via IPI IDs for (e) human (f) mouse (g) rat (h) zebrafish (i) <i>Arabidopsis</i> :<br>(e) <a href="http://harvester.kit.edu/harvester/human/IPI00968201">http://harvester.kit.edu/harvester/human/IPI00968201</a> (p53)<br>(f) <a href="http://harvester.kit.edu/harvester/mouse/IPI00114491">http://harvester.kit.edu/harvester/mouse/IPI00114491</a> (Cdk1)<br>(g) <a href="http://harvester.kit.edu/harvester/rat/IPI00950966">http://harvester.kit.edu/harvester/rat/IPI00950966</a> (DNA pol ε)<br>(h) <a href="http://harvester.kit.edu/harvester/zebrafish/IPI00890468">http://harvester.kit.edu/harvester/zebrafish/IPI00890468</a><br>(i) <a href="http://harvester.kit.edu/harvester/arabidopsis/IPI00516272">http://harvester.kit.edu/harvester/arabidopsis/IPI00516272</a> | (Liebel <i>et al.</i> , 2005)   |

## Supplemental Table S18

### Resources providing overviews of gene and protein function

| Resource                                                                                                                                   | Example web-links                                                                                                                                                                                                                                                                                                                                                                                                                                                                                                                                                                                                                                                                                                                                                                                                                                                                                                                                                                                                                                                                                                                                                                                                                                                                                                                                                                                                                                                                                                                                                                                                                                                                                                                                                                                                                                                                                                                                                                                                                                                                                                                                                                                                                                                                                                                                                                                                                                                                                                                                                                                                                                                                                                                                                                                                                                                                                                                                                                                                                                                                                                                                                                                                                                                                                                                                                                                                                                                                                                                                                                                                                                                                                                                                                | Reference                        |
|--------------------------------------------------------------------------------------------------------------------------------------------|------------------------------------------------------------------------------------------------------------------------------------------------------------------------------------------------------------------------------------------------------------------------------------------------------------------------------------------------------------------------------------------------------------------------------------------------------------------------------------------------------------------------------------------------------------------------------------------------------------------------------------------------------------------------------------------------------------------------------------------------------------------------------------------------------------------------------------------------------------------------------------------------------------------------------------------------------------------------------------------------------------------------------------------------------------------------------------------------------------------------------------------------------------------------------------------------------------------------------------------------------------------------------------------------------------------------------------------------------------------------------------------------------------------------------------------------------------------------------------------------------------------------------------------------------------------------------------------------------------------------------------------------------------------------------------------------------------------------------------------------------------------------------------------------------------------------------------------------------------------------------------------------------------------------------------------------------------------------------------------------------------------------------------------------------------------------------------------------------------------------------------------------------------------------------------------------------------------------------------------------------------------------------------------------------------------------------------------------------------------------------------------------------------------------------------------------------------------------------------------------------------------------------------------------------------------------------------------------------------------------------------------------------------------------------------------------------------------------------------------------------------------------------------------------------------------------------------------------------------------------------------------------------------------------------------------------------------------------------------------------------------------------------------------------------------------------------------------------------------------------------------------------------------------------------------------------------------------------------------------------------------------------------------------------------------------------------------------------------------------------------------------------------------------------------------------------------------------------------------------------------------------------------------------------------------------------------------------------------------------------------------------------------------------------------------------------------------------------------------------------------------------|----------------------------------|
| EBI Gene & Protein Summary<br><br><i>5 species:</i><br>human, mouse,<br><i>S. cerevisiae</i> ,<br><i>Drosophila</i> ,<br><i>C. elegans</i> | Direct link via (a) gene symbol (b) <i>S. cerevisiae</i> gene (c) <i>Drosophila</i> gene (d) <i>C. elegans</i> gene (e) Ensembl gene ID (f) RefSeq protein (g) UniProt ID:<br>(a) <a href="http://www.ebi.ac.uk/s4/summary/molecular?term=TP53">http://www.ebi.ac.uk/s4/summary/molecular?term=TP53</a> (p53)<br>(b) <a href="http://www.ebi.ac.uk/s4/summary/molecular?term=YBR156C">http://www.ebi.ac.uk/s4/summary/molecular?term=YBR156C</a><br>(c) <a href="http://www.ebi.ac.uk/s4/summary/molecular?term=FBgn0004106">http://www.ebi.ac.uk/s4/summary/molecular?term=FBgn0004106</a><br>(d) <a href="http://www.ebi.ac.uk/s4/summary/molecular?term=K08E3.6">http://www.ebi.ac.uk/s4/summary/molecular?term=K08E3.6</a><br>(e) <a href="http://www.ebi.ac.uk/s4/summary/molecular?term=ENSG00000156970">http://www.ebi.ac.uk/s4/summary/molecular?term=ENSG00000156970</a><br>(f) <a href="http://www.ebi.ac.uk/s4/summary/molecular?term=NP_035145">http://www.ebi.ac.uk/s4/summary/molecular?term=NP_035145</a><br>(g) <a href="http://www.ebi.ac.uk/s4/summary/molecular?term=P04637">http://www.ebi.ac.uk/s4/summary/molecular?term=P04637</a>                                                                                                                                                                                                                                                                                                                                                                                                                                                                                                                                                                                                                                                                                                                                                                                                                                                                                                                                                                                                                                                                                                                                                                                                                                                                                                                                                                                                                                                                                                                                                                                                                                                                                                                                                                                                                                                                                                                                                                                                                                                                                                                                                                                                                                                                                                                                                                                                                                                                                                                                                                                                        | (McWilliam <i>et al.</i> , 2013) |
| GeneCards<br>(human genes)                                                                                                                 | Home page: <a href="http://www.genecards.org/">http://www.genecards.org/</a><br>Direct link via human gene symbol:<br><a href="http://www.genecards.org/cgi-bin/carddisp.pl?gene=TP53">http://www.genecards.org/cgi-bin/carddisp.pl?gene=TP53</a> (p53)<br>Query via human IDs: (a) Ensembl gene (b) RefSeq nucleotide (c) RefSeq protein (d) UniProt:<br>(a) <a href="http://www.genecards.org/index.php?path=/Search/keyword/ENSG00000156970">http://www.genecards.org/index.php?path=/Search/keyword/ENSG00000156970</a><br>(b) <a href="http://www.genecards.org/index.php?path=/Search/keyword/NM_004153">http://www.genecards.org/index.php?path=/Search/keyword/NM_004153</a><br>(c) <a href="http://www.genecards.org/index.php?path=/Search/keyword/NP_004144">http://www.genecards.org/index.php?path=/Search/keyword/NP_004144</a><br>(d) <a href="http://www.genecards.org/index.php?path=/Search/SymbolAliasDescIdentifier/Q9H410">http://www.genecards.org/index.php?path=/Search/SymbolAliasDescIdentifier/Q9H410</a>                                                                                                                                                                                                                                                                                                                                                                                                                                                                                                                                                                                                                                                                                                                                                                                                                                                                                                                                                                                                                                                                                                                                                                                                                                                                                                                                                                                                                                                                                                                                                                                                                                                                                                                                                                                                                                                                                                                                                                                                                                                                                                                                                                                                                                                                                                                                                                                                                                                                                                                                                                                                                                                                                                                             | (Stelzer <i>et al.</i> , 2011)   |
| neXtProt<br>(human proteins)                                                                                                               | Home page: <a href="http://www.nextprot.org/">http://www.nextprot.org/</a><br>Query via (a) any text term (b) Ensembl gene ID:<br>(a) <a href="http://www.nextprot.org/db/search#importin">http://www.nextprot.org/db/search#importin</a><br>(b) <a href="http://www.nextprot.org/db/search#ENSG00000141510">http://www.nextprot.org/db/search#ENSG00000141510</a> (p53)<br>Direct link via human UniProt ID:<br><a href="http://www.nextprot.org/db/entry/NX_P06493">http://www.nextprot.org/db/entry/NX_P06493</a> (Cdk1)                                                                                                                                                                                                                                                                                                                                                                                                                                                                                                                                                                                                                                                                                                                                                                                                                                                                                                                                                                                                                                                                                                                                                                                                                                                                                                                                                                                                                                                                                                                                                                                                                                                                                                                                                                                                                                                                                                                                                                                                                                                                                                                                                                                                                                                                                                                                                                                                                                                                                                                                                                                                                                                                                                                                                                                                                                                                                                                                                                                                                                                                                                                                                                                                                                      | Gaudet <i>et al.</i> , 2013)     |
| InterMine family                                                                                                                           | <b>FlyMine</b> home page: <a href="http://www.flymine.org/">http://www.flymine.org/</a><br>Direct link via FlyBase ID:<br><a href="http://www.flymine.org/query/portal.do?externalids=FBgn0003525">http://www.flymine.org/query/portal.do?externalids=FBgn0003525</a><br>Query via any term (e.g. gene name, UniProt ID):<br><a href="http://www.flymine.org/release-38.0/keywordSearchResults.do?searchTerm=grapes">http://www.flymine.org/release-38.0/keywordSearchResults.do?searchTerm=grapes</a><br><b>YeastMine</b> ( <i>S. cerevisiae</i> ) home page: <a href="http://yeastmine.yeastgenome.org/">http://yeastmine.yeastgenome.org/</a><br>Direct link via gene name, SGD ID, systematic name:<br><a href="http://yeastmine.yeastgenome.org/yeastmine/portal.do?externalids=CDC28">http://yeastmine.yeastgenome.org/yeastmine/portal.do?externalids=CDC28</a><br>Query via any term (e.g. UniProt ID):<br><a href="http://yeastmine.yeastgenome.org/yeastmine/keywordSearchResults.do?searchTerm=P23291">http://yeastmine.yeastgenome.org/yeastmine/keywordSearchResults.do?searchTerm=P23291</a><br><b>metabolicMine</b> (includes <i>H. sapiens</i> ) home page: <a href="http://www.metabolicmine.org/">http://www.metabolicmine.org/</a><br>Direct link via gene symbol, Ensembl ID:<br><a href="http://www.metabolicmine.org/beta/portal.do?externalids=TP53">http://www.metabolicmine.org/beta/portal.do?externalids=TP53</a><br>Query via any term (e.g. UniProt ID):<br><a href="http://www.metabolicmine.org/beta/keywordSearchResults.do?searchTerm=P04637">http://www.metabolicmine.org/beta/keywordSearchResults.do?searchTerm=P04637</a><br><b>MouseMine</b> home page: <a href="http://www.mousemine.org/mousemine/">http://www.mousemine.org/mousemine/</a><br>Direct link via gene symbol, MGI, Ensembl, RefSeq, UniProt ID:<br><a href="http://www.mousemine.org/mousemine/portal.do?externalids=NM_011640">http://www.mousemine.org/mousemine/portal.do?externalids=NM_011640</a><br>Query via any term:<br><a href="http://www.mousemine.org/mousemine/keywordSearchResults.do?searchTerm=Cyclin">http://www.mousemine.org/mousemine/keywordSearchResults.do?searchTerm=Cyclin</a><br><b>RatMine</b> home page: <a href="http://ratmine.mcw.edu/">http://ratmine.mcw.edu/</a><br>Direct link via gene symbol, Ensembl, RefSeq ID:<br><a href="http://ratmine.mcw.edu/ratmine/portal.do?externalids=NM_053677">http://ratmine.mcw.edu/ratmine/portal.do?externalids=NM_053677</a><br>Query via any term (e.g. UniProt ID):<br><a href="http://ratmine.mcw.edu/ratmine/keywordSearchResults.do?searchTerm=Q63699">http://ratmine.mcw.edu/ratmine/keywordSearchResults.do?searchTerm=Q63699</a><br><b>ZebrafishMine</b> home page: <a href="http://zebrafishmine.org/">http://zebrafishmine.org/</a><br>Direct link via gene name, ZFIN, UniProt ID:<br><a href="http://zebrafishmine.org/portal.do?externalids=ZDB-GENE-000330-5">http://zebrafishmine.org/portal.do?externalids=ZDB-GENE-000330-5</a><br>Query via any term:<br><a href="http://zebrafishmine.org/keywordSearchResults.do?searchTerm=Cyclin">http://zebrafishmine.org/keywordSearchResults.do?searchTerm=Cyclin</a><br><b>modMine</b> (fly, worm) home page: <a href="http://intermine.modencode.org/">http://intermine.modencode.org/</a><br>Direct link via WormBase or FlyBase ID:<br><a href="http://intermine.modencode.org/query/portal.do?externalids=WBGene00009368">http://intermine.modencode.org/query/portal.do?externalids=WBGene00009368</a><br>Query via any term :<br><a href="http://intermine.modencode.org/release-32/keywordSearchResults.do?searchTerm=cdk">http://intermine.modencode.org/release-32/keywordSearchResults.do?searchTerm=cdk</a> | (Smith <i>et al.</i> , 2012)     |
| canSAR                                                                                                                                     | Home page: <a href="https://cansar.icr.ac.uk/">https://cansar.icr.ac.uk/</a><br>Direct link to “Molecular Target Synopsis Overview” page, via UniProt ID:<br><a href="https://cansar.icr.ac.uk/cansar/molecular-targets/P04637/">https://cansar.icr.ac.uk/cansar/molecular-targets/P04637/</a>                                                                                                                                                                                                                                                                                                                                                                                                                                                                                                                                                                                                                                                                                                                                                                                                                                                                                                                                                                                                                                                                                                                                                                                                                                                                                                                                                                                                                                                                                                                                                                                                                                                                                                                                                                                                                                                                                                                                                                                                                                                                                                                                                                                                                                                                                                                                                                                                                                                                                                                                                                                                                                                                                                                                                                                                                                                                                                                                                                                                                                                                                                                                                                                                                                                                                                                                                                                                                                                                   | (Bulusu <i>et al.</i> , 2014)    |
| BioGPS                                                                                                                                     | Home page: <a href="http://www.biogps.org/">http://www.biogps.org/</a><br>Query via any term: <a href="http://www.biogps.org/#goto=search&amp;query=ABL1">http://www.biogps.org/#goto=search&amp;query=ABL1</a><br>Direct link to gene report via (a) NCBI Gene (b) RefSeq or UniProt ID:<br>(a) <a href="http://www.biogps.org/#goto=genereport&amp;id=7157">http://www.biogps.org/#goto=genereport&amp;id=7157</a><br>(b) <a href="http://www.biogps.org/#goto=search&amp;query=P04637">http://www.biogps.org/#goto=search&amp;query=P04637</a>                                                                                                                                                                                                                                                                                                                                                                                                                                                                                                                                                                                                                                                                                                                                                                                                                                                                                                                                                                                                                                                                                                                                                                                                                                                                                                                                                                                                                                                                                                                                                                                                                                                                                                                                                                                                                                                                                                                                                                                                                                                                                                                                                                                                                                                                                                                                                                                                                                                                                                                                                                                                                                                                                                                                                                                                                                                                                                                                                                                                                                                                                                                                                                                                                | (Wu <i>et al.</i> , 2013)        |

## Supplemental Table S19

### Tools for retrieving information about multiple gene or protein hits

| Resource                                                                                                                                                                                                                                                                                                                                                                           | Web address for input or upload of IDs                                                                                                                                                                                                                                 | References                                                                           |
|------------------------------------------------------------------------------------------------------------------------------------------------------------------------------------------------------------------------------------------------------------------------------------------------------------------------------------------------------------------------------------|------------------------------------------------------------------------------------------------------------------------------------------------------------------------------------------------------------------------------------------------------------------------|--------------------------------------------------------------------------------------|
| <i>Annotation of results tables</i>                                                                                                                                                                                                                                                                                                                                                |                                                                                                                                                                                                                                                                        |                                                                                      |
| PANTHER<br><i>See Supplemental Method S4.</i>                                                                                                                                                                                                                                                                                                                                      | <a href="http://www.pantherdb.org/genes/batchIdSearch.jsp">http://www.pantherdb.org/genes/batchIdSearch.jsp</a><br>- “Batch ID Search”                                                                                                                                 | (Mi <i>et al.</i> , 2013)                                                            |
| DAVID<br><i>See Supplemental Method S5.</i>                                                                                                                                                                                                                                                                                                                                        | <a href="http://david.abcc.ncifcrf.gov/tools.jsp">http://david.abcc.ncifcrf.gov/tools.jsp</a><br>- “Analysis Wizard”                                                                                                                                                   | (Huang da <i>et al.</i> , 2009b)                                                     |
| UniProt<br><i>See Supplemental Method S6.</i>                                                                                                                                                                                                                                                                                                                                      | Via “Retrieve” tab (for UniProt IDs):<br><a href="http://www.uniprot.org/?tab=batch">http://www.uniprot.org/?tab=batch</a><br><br>Via “ID Mapping” tab (for non-UniProt IDs):<br><a href="http://www.uniprot.org/?tab=mapping">http://www.uniprot.org/?tab=mapping</a> | (UniProt, 2014)                                                                      |
| bioCompendium                                                                                                                                                                                                                                                                                                                                                                      | <a href="http://biocompendium.embl.de/">http://biocompendium.embl.de/</a>                                                                                                                                                                                              |                                                                                      |
| <i>Graphical display of protein domains</i>                                                                                                                                                                                                                                                                                                                                        |                                                                                                                                                                                                                                                                        |                                                                                      |
| CDD                                                                                                                                                                                                                                                                                                                                                                                | <a href="http://www.ncbi.nlm.nih.gov/Structure/bwrpsb/bwrpsb.cgi">http://www.ncbi.nlm.nih.gov/Structure/bwrpsb/bwrpsb.cgi</a><br>- “Batch Web CD-Search Tool”. Click “Submit”, then “Browse results in graphical format”                                               | (Marchler-Bauer <i>et al.</i> , 2013)                                                |
| SMART                                                                                                                                                                                                                                                                                                                                                                              | <a href="http://smart.embl.de/smart/batch.pl">http://smart.embl.de/smart/batch.pl</a><br>- “precomputed results batch retrieval”                                                                                                                                       | (Letunic <i>et al.</i> , 2012)                                                       |
| <i>Interaction network diagram of multiple gene products</i>                                                                                                                                                                                                                                                                                                                       |                                                                                                                                                                                                                                                                        |                                                                                      |
| STRING<br><i>See Supplemental Method S7.</i>                                                                                                                                                                                                                                                                                                                                       | <a href="http://string-db.org/newstring.cgi/show_input_page.pl?input_page_type=multiple_identifiers">http://string-db.org/newstring.cgi/show_input_page.pl?input_page_type=multiple_identifiers</a><br>- “multiple names” tab                                          | (Franceschini <i>et al.</i> , 2013)                                                  |
| Interactome3D                                                                                                                                                                                                                                                                                                                                                                      | <a href="http://interactome3d.irbbarcelona.org/">http://interactome3d.irbbarcelona.org/</a><br>- “Query interactions with proteins” section                                                                                                                            | (Mosca <i>et al.</i> , 2013)                                                         |
| Cytoscape                                                                                                                                                                                                                                                                                                                                                                          | Link for software download, documentation etc:<br><a href="http://www.cytoscape.org/">http://www.cytoscape.org/</a><br>App store (plugins): <a href="http://apps.cytoscape.org/">http://apps.cytoscape.org/</a>                                                        | (Smoot <i>et al.</i> , 2011; Saito <i>et al.</i> , 2012; Lotia <i>et al.</i> , 2013) |
| <i>Pathway analysis of multiple gene products</i>                                                                                                                                                                                                                                                                                                                                  |                                                                                                                                                                                                                                                                        |                                                                                      |
| GenMAPP                                                                                                                                                                                                                                                                                                                                                                            | Link for software download, documentation etc:<br><a href="http://www.genmapp.org/">http://www.genmapp.org/</a>                                                                                                                                                        | (Salomonis <i>et al.</i> , 2007)                                                     |
| <i>Multiple gene reports</i>                                                                                                                                                                                                                                                                                                                                                       |                                                                                                                                                                                                                                                                        |                                                                                      |
| BioGPS                                                                                                                                                                                                                                                                                                                                                                             | <a href="http://www.biogps.org/#goto=welcome">http://www.biogps.org/#goto=welcome</a><br>- “Search genes here” section                                                                                                                                                 | (Wu <i>et al.</i> , 2013)                                                            |
| <i>Bioinformatic enrichment tools</i>                                                                                                                                                                                                                                                                                                                                              |                                                                                                                                                                                                                                                                        |                                                                                      |
| DAVID                                                                                                                                                                                                                                                                                                                                                                              | <a href="http://david.abcc.ncifcrf.gov/tools.jsp">http://david.abcc.ncifcrf.gov/tools.jsp</a><br>- “Analysis Wizard”                                                                                                                                                   | (Huang da <i>et al.</i> , 2009b)                                                     |
| GeneCodis                                                                                                                                                                                                                                                                                                                                                                          | <a href="http://genecodis.cnb.csic.es/">http://genecodis.cnb.csic.es/</a>                                                                                                                                                                                              | (Tabas-Madrid <i>et al.</i> , 2012)                                                  |
| GenePattern                                                                                                                                                                                                                                                                                                                                                                        | Link for software download, documentation etc:<br><a href="http://www.broadinstitute.org/cancer/software/gene-pattern/">http://www.broadinstitute.org/cancer/software/gene-pattern/</a>                                                                                | (Reich <i>et al.</i> , 2006)                                                         |
| GO-Elite                                                                                                                                                                                                                                                                                                                                                                           | <a href="http://www.genmapp.org/go_elite/">http://www.genmapp.org/go_elite/</a>                                                                                                                                                                                        | (Zambon <i>et al.</i> , 2012)                                                        |
| GOToolBox                                                                                                                                                                                                                                                                                                                                                                          | <a href="http://genome.crg.es/GOToolBox/">http://genome.crg.es/GOToolBox/</a>                                                                                                                                                                                          | (Martin <i>et al.</i> , 2004)                                                        |
| STRING                                                                                                                                                                                                                                                                                                                                                                             | <a href="http://string-db.org/newstring.cgi/show_input_page.pl?input_page_type=multiple_identifiers">http://string-db.org/newstring.cgi/show_input_page.pl?input_page_type=multiple_identifiers</a><br>- “multiple names” tab                                          | (Franceschini <i>et al.</i> , 2013)                                                  |
| <p><i>The above is a very limited selection of the bioinformatic enrichment tools available. For a more comprehensive listing, description and comparison of such software, readers are invited to consult the following reviews, and links &amp; references therein:</i><br/>Hedegaard <i>et al.</i>, 2009; Huang da <i>et al.</i>, 2009a; Kouskoumvekaki <i>et al.</i>, 2013</p> |                                                                                                                                                                                                                                                                        |                                                                                      |



## Supplemental Table S20

Hyperlinked table: a selection of resources for the example cell proliferation factors

| Gene   | UniProt | Protein name                          | Gene ontology, gene & protein overview, search engine |                      |                           |                         |                          |                           | Interactions and pathways |                         |                        |                          |
|--------|---------|---------------------------------------|-------------------------------------------------------|----------------------|---------------------------|-------------------------|--------------------------|---------------------------|---------------------------|-------------------------|------------------------|--------------------------|
|        |         |                                       | QuickGO                                               | OMIM                 | GeneCards                 | EBI Summary             | neXtProt                 | Bioinfo Harvester         | IntAct                    | BioGRID                 | STRING                 | Reactome                 |
| TP53   | P04637  | Tumor Suppressor p53                  | <a href="#">GO</a>                                    | <a href="#">OMIM</a> | <a href="#">GeneCards</a> | <a href="#">EBI Sum</a> | <a href="#">neXtProt</a> | <a href="#">Harvester</a> | <a href="#">IntAct</a>    | <a href="#">BioGRID</a> | <a href="#">STRING</a> | <a href="#">Reactome</a> |
| CDK1   | P06493  | Cyclin-dependent kinase 1             | <a href="#">GO</a>                                    | <a href="#">OMIM</a> | <a href="#">GeneCards</a> | <a href="#">EBI Sum</a> | <a href="#">neXtProt</a> | <a href="#">Harvester</a> | <a href="#">IntAct</a>    | <a href="#">BioGRID</a> | <a href="#">STRING</a> | <a href="#">Reactome</a> |
| POLE   | Q07864  | DNA Polymerase Epsilon                | <a href="#">GO</a>                                    | <a href="#">OMIM</a> | <a href="#">GeneCards</a> | <a href="#">EBI Sum</a> | <a href="#">neXtProt</a> | <a href="#">Harvester</a> | <a href="#">IntAct</a>    | <a href="#">BioGRID</a> | <a href="#">STRING</a> | <a href="#">Reactome</a> |
| KPNB1  | Q14974  | Importin subunit beta-1               | <a href="#">GO</a>                                    | <a href="#">OMIM</a> | <a href="#">GeneCards</a> | <a href="#">EBI Sum</a> | <a href="#">neXtProt</a> | <a href="#">Harvester</a> | <a href="#">IntAct</a>    | <a href="#">BioGRID</a> | <a href="#">STRING</a> | <a href="#">Reactome</a> |
| CHEK1  | O14757  | Ser/Thr protein kinase Chk1           | <a href="#">GO</a>                                    | <a href="#">OMIM</a> | <a href="#">GeneCards</a> | <a href="#">EBI Sum</a> | <a href="#">neXtProt</a> | <a href="#">Harvester</a> | <a href="#">IntAct</a>    | <a href="#">BioGRID</a> | <a href="#">STRING</a> | <a href="#">Reactome</a> |
| AURKB  | Q96GD4  | Aurora kinase B                       | <a href="#">GO</a>                                    | <a href="#">OMIM</a> | <a href="#">GeneCards</a> | <a href="#">EBI Sum</a> | <a href="#">neXtProt</a> | <a href="#">Harvester</a> | <a href="#">IntAct</a>    | <a href="#">BioGRID</a> | <a href="#">STRING</a> | <a href="#">Reactome</a> |
| RPA2   | P15927  | Replication protein A, 32 kDa subunit | <a href="#">GO</a>                                    | <a href="#">OMIM</a> | <a href="#">GeneCards</a> | <a href="#">EBI Sum</a> | <a href="#">neXtProt</a> | <a href="#">Harvester</a> | <a href="#">IntAct</a>    | <a href="#">BioGRID</a> | <a href="#">STRING</a> | <a href="#">Reactome</a> |
| CDT1   | Q9H211  | DNA replication factor Cdt1           | <a href="#">GO</a>                                    | <a href="#">OMIM</a> | <a href="#">GeneCards</a> | <a href="#">EBI Sum</a> | <a href="#">neXtProt</a> | <a href="#">Harvester</a> | <a href="#">IntAct</a>    | <a href="#">BioGRID</a> | <a href="#">STRING</a> | <a href="#">Reactome</a> |
| MCMBP  | Q9BTE3  | MCM complex-binding protein           | <a href="#">GO</a>                                    | <a href="#">OMIM</a> | <a href="#">GeneCards</a> | <a href="#">EBI Sum</a> | <a href="#">neXtProt</a> | <a href="#">Harvester</a> | <a href="#">IntAct</a>    | <a href="#">BioGRID</a> | <a href="#">STRING</a> | <a href="#">Reactome</a> |
| TUBG1  | P23258  | Tubulin gamma-1 chain                 | <a href="#">GO</a>                                    | <a href="#">OMIM</a> | <a href="#">GeneCards</a> | <a href="#">EBI Sum</a> | <a href="#">neXtProt</a> | <a href="#">Harvester</a> | <a href="#">IntAct</a>    | <a href="#">BioGRID</a> | <a href="#">STRING</a> | <a href="#">Reactome</a> |
| RAN    | P62826  | GTP-binding nuclear protein Ran       | <a href="#">GO</a>                                    | <a href="#">OMIM</a> | <a href="#">GeneCards</a> | <a href="#">EBI Sum</a> | <a href="#">neXtProt</a> | <a href="#">Harvester</a> | <a href="#">IntAct</a>    | <a href="#">BioGRID</a> | <a href="#">STRING</a> | <a href="#">Reactome</a> |
| RANGRF | Q9HD47  | Ran guanine nucleotide factor Mog1    | <a href="#">GO</a>                                    | <a href="#">OMIM</a> | <a href="#">GeneCards</a> | <a href="#">EBI Sum</a> | <a href="#">neXtProt</a> | <a href="#">Harvester</a> | <a href="#">IntAct</a>    | <a href="#">BioGRID</a> | <a href="#">STRING</a> | <a href="#">Reactome</a> |
| BLM    | P54132  | Bloom syndrome protein                | <a href="#">GO</a>                                    | <a href="#">OMIM</a> | <a href="#">GeneCards</a> | <a href="#">EBI Sum</a> | <a href="#">neXtProt</a> | <a href="#">Harvester</a> | <a href="#">IntAct</a>    | <a href="#">BioGRID</a> | <a href="#">STRING</a> | <a href="#">Reactome</a> |
| PCNA   | P12004  | Proliferating Cell Nuclear Antigen    | <a href="#">GO</a>                                    | <a href="#">OMIM</a> | <a href="#">GeneCards</a> | <a href="#">EBI Sum</a> | <a href="#">neXtProt</a> | <a href="#">Harvester</a> | <a href="#">IntAct</a>    | <a href="#">BioGRID</a> | <a href="#">STRING</a> | <a href="#">Reactome</a> |
| SETD8  | Q9NQR1  | Pr-Set7                               | <a href="#">GO</a>                                    | <a href="#">OMIM</a> | <a href="#">GeneCards</a> | <a href="#">EBI Sum</a> | <a href="#">neXtProt</a> | <a href="#">Harvester</a> | <a href="#">IntAct</a>    | <a href="#">BioGRID</a> | <a href="#">STRING</a> | <a href="#">Reactome</a> |
| RCC1   | P18754  | Regulator of chromosome condensation  | <a href="#">GO</a>                                    | <a href="#">OMIM</a> | <a href="#">GeneCards</a> | <a href="#">EBI Sum</a> | <a href="#">neXtProt</a> | <a href="#">Harvester</a> | <a href="#">IntAct</a>    | <a href="#">BioGRID</a> | <a href="#">STRING</a> | <a href="#">Reactome</a> |
| MCM5   | P33992  | DNA replication factor MCM5           | <a href="#">GO</a>                                    | <a href="#">OMIM</a> | <a href="#">GeneCards</a> | <a href="#">EBI Sum</a> | <a href="#">neXtProt</a> | <a href="#">Harvester</a> | <a href="#">IntAct</a>    | <a href="#">BioGRID</a> | <a href="#">STRING</a> | <a href="#">Reactome</a> |
| CDC25C | P30307  | M-phase inducer phosphatase           | <a href="#">GO</a>                                    | <a href="#">OMIM</a> | <a href="#">GeneCards</a> | <a href="#">EBI Sum</a> | <a href="#">neXtProt</a> | <a href="#">Harvester</a> | <a href="#">IntAct</a>    | <a href="#">BioGRID</a> | <a href="#">STRING</a> | <a href="#">Reactome</a> |
| PLK1   | P53350  | Ser/Thr protein kinase PLK1           | <a href="#">GO</a>                                    | <a href="#">OMIM</a> | <a href="#">GeneCards</a> | <a href="#">EBI Sum</a> | <a href="#">neXtProt</a> | <a href="#">Harvester</a> | <a href="#">IntAct</a>    | <a href="#">BioGRID</a> | <a href="#">STRING</a> | <a href="#">Reactome</a> |
| MZT1   | Q08AG7  | Mitotic-spindle organizing protein 1  | <a href="#">GO</a>                                    | <a href="#">OMIM</a> | <a href="#">GeneCards</a> | <a href="#">EBI Sum</a> | <a href="#">neXtProt</a> | <a href="#">Harvester</a> | <a href="#">IntAct</a>    | <a href="#">BioGRID</a> | <a href="#">STRING</a> | <a href="#">Reactome</a> |

| Gene   | UniProt | Protein name                          | Protein domains and features |                       |                          |                     |                     |                       |                       | Protein structure, phosphorylation |                     | Drugs                  |
|--------|---------|---------------------------------------|------------------------------|-----------------------|--------------------------|---------------------|---------------------|-----------------------|-----------------------|------------------------------------|---------------------|------------------------|
|        |         |                                       | Pfam                         | SMART                 | InterPro                 | CDD                 | ELM                 | Dasty                 | Annie                 | PDBsum                             | Phospho Site Plus   | canSAR                 |
| TP53   | P04637  | Tumor Suppressor p53                  | <a href="#">Pfam</a>         | <a href="#">SMART</a> | <a href="#">InterPro</a> | <a href="#">CDD</a> | <a href="#">ELM</a> | <a href="#">Dasty</a> | <a href="#">Annie</a> | <a href="#">PDBsum</a>             | <a href="#">PSP</a> | <a href="#">canSAR</a> |
| CDK1   | P06493  | Cyclin-dependent kinase 1             | <a href="#">Pfam</a>         | <a href="#">SMART</a> | <a href="#">InterPro</a> | <a href="#">CDD</a> | <a href="#">ELM</a> | <a href="#">Dasty</a> | <a href="#">Annie</a> | <a href="#">PDBsum</a>             | <a href="#">PSP</a> | <a href="#">canSAR</a> |
| POLE   | Q07864  | DNA Polymerase Epsilon                | <a href="#">Pfam</a>         | <a href="#">SMART</a> | <a href="#">InterPro</a> | <a href="#">CDD</a> | <a href="#">ELM</a> | <a href="#">Dasty</a> | <a href="#">Annie</a> | <a href="#">PDBsum</a>             | <a href="#">PSP</a> | <a href="#">canSAR</a> |
| KPNB1  | Q14974  | Importin subunit beta-1               | <a href="#">Pfam</a>         | <a href="#">SMART</a> | <a href="#">InterPro</a> | <a href="#">CDD</a> | <a href="#">ELM</a> | <a href="#">Dasty</a> | <a href="#">Annie</a> | <a href="#">PDBsum</a>             | <a href="#">PSP</a> | <a href="#">canSAR</a> |
| CHEK1  | O14757  | Ser/Thr protein kinase Chk1           | <a href="#">Pfam</a>         | <a href="#">SMART</a> | <a href="#">InterPro</a> | <a href="#">CDD</a> | <a href="#">ELM</a> | <a href="#">Dasty</a> | <a href="#">Annie</a> | <a href="#">PDBsum</a>             | <a href="#">PSP</a> | <a href="#">canSAR</a> |
| AURKB  | Q96GD4  | Aurora kinase B                       | <a href="#">Pfam</a>         | <a href="#">SMART</a> | <a href="#">InterPro</a> | <a href="#">CDD</a> | <a href="#">ELM</a> | <a href="#">Dasty</a> | <a href="#">Annie</a> | <a href="#">PDBsum</a>             | <a href="#">PSP</a> | <a href="#">canSAR</a> |
| RPA2   | P15927  | Replication protein A, 32 kDa subunit | <a href="#">Pfam</a>         | <a href="#">SMART</a> | <a href="#">InterPro</a> | <a href="#">CDD</a> | <a href="#">ELM</a> | <a href="#">Dasty</a> | <a href="#">Annie</a> | <a href="#">PDBsum</a>             | <a href="#">PSP</a> | <a href="#">canSAR</a> |
| CDT1   | Q9H211  | DNA replication factor Cdt1           | <a href="#">Pfam</a>         | <a href="#">SMART</a> | <a href="#">InterPro</a> | <a href="#">CDD</a> | <a href="#">ELM</a> | <a href="#">Dasty</a> | <a href="#">Annie</a> | <a href="#">PDBsum</a>             | <a href="#">PSP</a> | <a href="#">canSAR</a> |
| MCMBP  | Q9BTE3  | MCM complex-binding protein           | <a href="#">Pfam</a>         | <a href="#">SMART</a> | <a href="#">InterPro</a> | <a href="#">CDD</a> | <a href="#">ELM</a> | <a href="#">Dasty</a> | <a href="#">Annie</a> | <a href="#">PDBsum</a>             | <a href="#">PSP</a> | <a href="#">canSAR</a> |
| TUBG1  | P23258  | Tubulin gamma-1 chain                 | <a href="#">Pfam</a>         | <a href="#">SMART</a> | <a href="#">InterPro</a> | <a href="#">CDD</a> | <a href="#">ELM</a> | <a href="#">Dasty</a> | <a href="#">Annie</a> | <a href="#">PDBsum</a>             | <a href="#">PSP</a> | <a href="#">canSAR</a> |
| RAN    | P62826  | GTP-binding nuclear protein Ran       | <a href="#">Pfam</a>         | <a href="#">SMART</a> | <a href="#">InterPro</a> | <a href="#">CDD</a> | <a href="#">ELM</a> | <a href="#">Dasty</a> | <a href="#">Annie</a> | <a href="#">PDBsum</a>             | <a href="#">PSP</a> | <a href="#">canSAR</a> |
| RANGRF | Q9HD47  | Ran guanine nucleotide factor Mog1    | <a href="#">Pfam</a>         | <a href="#">SMART</a> | <a href="#">InterPro</a> | <a href="#">CDD</a> | <a href="#">ELM</a> | <a href="#">Dasty</a> | <a href="#">Annie</a> | <a href="#">PDBsum</a>             | <a href="#">PSP</a> | <a href="#">canSAR</a> |
| BLM    | P54132  | Bloom syndrome protein                | <a href="#">Pfam</a>         | <a href="#">SMART</a> | <a href="#">InterPro</a> | <a href="#">CDD</a> | <a href="#">ELM</a> | <a href="#">Dasty</a> | <a href="#">Annie</a> | <a href="#">PDBsum</a>             | <a href="#">PSP</a> | <a href="#">canSAR</a> |
| PCNA   | P12004  | Proliferating Cell Nuclear Antigen    | <a href="#">Pfam</a>         | <a href="#">SMART</a> | <a href="#">InterPro</a> | <a href="#">CDD</a> | <a href="#">ELM</a> | <a href="#">Dasty</a> | <a href="#">Annie</a> | <a href="#">PDBsum</a>             | <a href="#">PSP</a> | <a href="#">canSAR</a> |
| SETD8  | Q9NQR1  | Pr-Set7                               | <a href="#">Pfam</a>         | <a href="#">SMART</a> | <a href="#">InterPro</a> | <a href="#">CDD</a> | <a href="#">ELM</a> | <a href="#">Dasty</a> | <a href="#">Annie</a> | <a href="#">PDBsum</a>             | <a href="#">PSP</a> | <a href="#">canSAR</a> |
| RCC1   | P18754  | Regulator of chromosome condensation  | <a href="#">Pfam</a>         | <a href="#">SMART</a> | <a href="#">InterPro</a> | <a href="#">CDD</a> | <a href="#">ELM</a> | <a href="#">Dasty</a> | <a href="#">Annie</a> | <a href="#">PDBsum</a>             | <a href="#">PSP</a> | <a href="#">canSAR</a> |
| MCM5   | P33992  | DNA replication factor MCM5           | <a href="#">Pfam</a>         | <a href="#">SMART</a> | <a href="#">InterPro</a> | <a href="#">CDD</a> | <a href="#">ELM</a> | <a href="#">Dasty</a> | <a href="#">Annie</a> | <a href="#">PDBsum</a>             | <a href="#">PSP</a> | <a href="#">canSAR</a> |
| CDC25C | P30307  | M-phase inducer phosphatase           | <a href="#">Pfam</a>         | <a href="#">SMART</a> | <a href="#">InterPro</a> | <a href="#">CDD</a> | <a href="#">ELM</a> | <a href="#">Dasty</a> | <a href="#">Annie</a> | <a href="#">PDBsum</a>             | <a href="#">PSP</a> | <a href="#">canSAR</a> |
| PLK1   | P53350  | Ser/Thr protein kinase PLK1           | <a href="#">Pfam</a>         | <a href="#">SMART</a> | <a href="#">InterPro</a> | <a href="#">CDD</a> | <a href="#">ELM</a> | <a href="#">Dasty</a> | <a href="#">Annie</a> | <a href="#">PDBsum</a>             | <a href="#">PSP</a> | <a href="#">canSAR</a> |
| MZT1   | Q08AG7  | Mitotic-spindle organizing protein 1  | <a href="#">Pfam</a>         | <a href="#">SMART</a> | <a href="#">InterPro</a> | <a href="#">CDD</a> | <a href="#">ELM</a> | <a href="#">Dasty</a> | <a href="#">Annie</a> | <a href="#">PDBsum</a>             | <a href="#">PSP</a> | <a href="#">canSAR</a> |

## Supplemental Method S1

### Procedure for creating a hyperlinked results table.

*Hyperlinks are created in a spreadsheet - based on gene, transcript or protein IDs - linking to specific entries in bioinformatic database resources.*

The most commonly-used spreadsheet software (including *Microsoft Excel*, *Google docs*, *Apple Numbers*, *OpenOffice.org Calc*) allows web-links to be added to spreadsheet cells by means of a function called “HYPERLINK”.

For example, the following UniProt link: <http://www.uniprot.org/uniprot/P04637> can be expressed using a spreadsheet HYPERLINK function, thus:

```
=HYPERLINK("http://www.uniprot.org/uniprot/P04637","UniProt")
```

Using this function, a hyperlink appears within the spreadsheet cell (visible with the text “UniProt”), which when clicked opens that web-page in the user’s default web browser.

Expressing the web-link as a HYPERLINK function enables a reference to another spreadsheet cell (e.g. cell “A2”) - and thus the contents of that cell - to be incorporated into the hyperlink.

So if cell A2 contains a gene or protein ID (for example the UniProt ID “P04637”), then a HYPERLINK function can be entered in a cell (typically nearby in the same row, e.g. cell B2) to refer to the contents of cell A2, thus:

```
=HYPERLINK("http://www.uniprot.org/uniprot/"&A2,"UniProt")
```

```
or =HYPERLINK("http://www.uniprot.org/uniprot/"&A2&"#section_features","UniProt-Feat")
```

This HYPERLINK function can then be copied to all cells in that column (with the relevant cell references being updated) by “dragging down” the cell to the bottom of the table. The addition of multiple hyperlinks to results tables can be automated using a macro, where available.

## Supplemental Method S2

### Procedure for extracting gene symbols from UniProt protein entries.

*This allows direct access to resources based on gene symbols, where the primary hits are UniProt proteins.*

In UniProt, the standard format of a header row contains the corresponding official gene symbol, preceded by the text “GN=”, such as in the example below:

```
>sp|Q9H1A4|APC1_HUMAN Anaphase-promoting complex subunit 1 OS=Homo sapiens  
GN=ANAPC1 PE=1 SV=1
```

Extracting the gene symbol “ANAPC1” from the header row is a text-trimming exercise, easily performed in standard spreadsheet software using two search-and-replace operations.

#### **To trim the surrounding text to just the gene symbol (e.g. “ANAPC1”):**

1. Create a new column next to that containing the protein headings.
2. Select the column containing the protein headings, copy the contents to the clipboard, then paste the contents into the newly-created column.
3. In the new column, search for “\*GN=”, and replace with “” (nothing).
4. In the same column, search for “\*”, and replace with “” (nothing).

The new column will now contain only the gene symbols, ready for linking to gene-oriented databases.

## Supplemental Method S3

### Procedure for obtaining reviewed UniProt (i.e. Swiss-Prot) IDs from a list of gene symbols.

*This allows resources based on UniProt protein IDs to be accessed in cases where only the gene symbols are known.*

#### 1. Obtaining a list of gene IDs from gene names/symbols

Go to the relevant organism-specific gene database website (e.g. HGNC, MGI).

Use the database's facility to batch identify gene IDs from gene names / symbols.

Select this list of gene IDs (command + drag for an HTML table), and copy to the clipboard.

#### 2. Converting Gene IDs to UniProt IDs

Go to the UniProt's "ID Mapping" site: <http://www.uniprot.org/?tab=mapping>.

In the "Database identifiers" window, paste in the gene IDs. In the "From" pull-down menu, choose the appropriate organism-specific gene database. The "To" option should then read "UniProtKB AC".

Click "Map": this generates a list of input IDs and their mapped UniProt counterparts.

Click "UniProtKB": this produces a table of the mapped UniProt entries, with some attributes.

Click "Show only reviewed" (where appropriate): this shows only the Swiss-Prot entries.

Click "Customize", choose "Gene names" then "Show »". Check the "Name" box, and click "Show »". Click "Save": the UniProt table should then be updated, with an extra column headed "Gene names (PREFERRED)".

The contents of the columns "Entry" (UniProt ID) and "Gene Names (PREFERRED)" can then be copied from the UniProt table, and pasted back into the original results spreadsheet. Note that the contents of these two new columns may need to be sorted so that they match the order in the original hits table.

## Supplemental Method S4

### Procedure for generating an annotated results table (using PANTHER).

Annotations include: GO-slim terms, and PANTHER “protein class” and “Pathway” terms.

#### 1. Importing hits from the results table into PANTHER

*In results spreadsheet:* copy the list of IDs from the results table.

*In a web browser:* go to the PANTHER website: <http://www.pantherdb.org/>

Under the “Gene List Analysis” tab, paste the copied IDs into the box headed “Enter ids and or select file for batch upload”. Select the relevant organism from the list.

Select “Functional classification viewed in gene list”. Click “submit”.

A web-based annotation table will be presented.

To generate pie-charts of GO- and PANTHER-term usage, click the pie-chart icon.

#### 2. Transferring the PANTHER functional annotation table into a spreadsheet

Above the table, after “Send list to:”, select “File”. Save the file (default filename “pantherGeneList.txt”) to a known location.

*In spreadsheet program:* import the PANTHER text file. (For *Microsoft Excel*: open a new spreadsheet. Choose >File >Import.... Choose “Text file”, click “Import”. Select the file saved by PANTHER, and click “Get Data”. In the Text Import Wizard, choose “Delimited”, then “Next >”. Under “Delimiters”, choose “Tab”, then “Next >”. Click “Finish”. In “Import Data”, click “OK”.)

**Output:** columns appear (without header names) in the following order:

|                                                   |                                                   |
|---------------------------------------------------|---------------------------------------------------|
| <b>A</b> : Gene ID (PANTHER format)               | <b>F</b> : GO Biological Process (“PANTHER slim”) |
| <b>B</b> : Mapped IDs                             | <b>G</b> : GO Cellular Component (“PANTHER slim”) |
| <b>C</b> : Name; Gene Symbol; Orthologue          | <b>H</b> : PANTHER Protein Class                  |
| <b>D</b> : PANTHER Family/Subfamily               | <b>I</b> : PANTHER Pathway                        |
| <b>E</b> : GO Molecular Function (“PANTHER slim”) | <b>J</b> : Species                                |

Note: the rows in the PANTHER-annotated table may need to be sorted so that they match those in the original hits table, before being integrated into the results spreadsheet.

## Supplemental Method S5

### Procedure for generating an annotated results table (using DAVID).

*Annotations include: full GO and OMIM terms, BioCarta and KEGG pathways, and InterPro and SMART domains.*

#### 1. Importing hits from the results table into *DAVID*

*In results spreadsheet:* copy the list of IDs from the results table.

*In a web browser:* go to the DAVID Analysis Wizard: <http://david.abcc.ncifcrf.gov/tools.jsp>

Click the “Upload” tab (if not already selected).

Under “Step 1: Enter Gene List” and “A: Paste a list”, paste in the list of IDs.

Under “Step 2: Select Identifier”, choose the type of ID from the pull-down menu.

Under “Step 3: List Type”, select “Gene List”.

Under “Step 4: Submit List”, click “Submit List”.

#### 2. Generating a *DAVID* “Functional Annotation Table”

Under “Step 2. Analyze above gene list with one of DAVID tools”, click “Functional Annotation Table”.

In the “Annotation Summary Results” page, under “Combined View for Selected Annotation”, click “Functional Annotation Table”. This opens a web-based table with multiple functional annotations.

#### 3. Transferring the *DAVID* Functional Annotation Table into a spreadsheet

*In DAVID “Functional Annotation Table” page:* click “Download File” (upper-right corner of the table): this opens the annotations in a plain-text format in a browser window.

Select all of the text, copy to the clipboard.

*In spreadsheet program:* open a new blank spreadsheet document. Paste the clipboard contents into the blank spreadsheet (note- for *Microsoft Excel*, use “Paste Special”, choosing “Text”). The list of proteins and annotations will appear in separate columns.

Note: the rows in the DAVID-annotated table may need to be sorted so that they match those in the original hits table, before being integrated into the results spreadsheet.

## Supplemental Method S6

### Procedure for generating an annotated results table (using UniProt).

*Annotations include: amino acid sequence, disease association, domain descriptions, features, gene symbol & synonyms, general annotation, GO terms (combined), InterPro classification, keywords, protein names, subcellular location.*

#### 1. Importing hits from the results table into UniProt

*In the results spreadsheet:* select the IDs of the hits in the table, copy to the clipboard.

*For hits in UniProt format:* use the “Retrieve” function: <http://www.uniprot.org/?tab=batch>.

Paste the IDs into the window headed “UniProt identifiers”. Click “Retrieve”.

*For hits in other formats:* use the “ID Mapping” function: <http://www.uniprot.org/?tab=mapping>.

Paste the IDs into the window headed “Database identifiers”. In the “From” drop-down menu choose the database corresponding to the ID type. Click “Map”.

The hits then appear (as proteins) in a web-based table in UniProt.

#### 2. Choosing annotation attributes to be added

Above the UniProt table, click “Customize”.

Under the “Columns” list appears a list of features that can be added to annotate the hits table.

Select the desired features and click “Show »”.

Click “Save” to update the UniProt table with annotations of the chosen type.

#### 3. Transferring the UniProt-annotated table into a spreadsheet

Click the “Download” button.

To open in the table in *Microsoft Excel*, under the “Excel” heading, click “Open”.

The table can be saved in the tab-delimited format for import into other spreadsheet programs: under the “Tab-Delimited” heading, click “Open”. Select the text, copy to clipboard. Paste into the program of your choice.

Note: the rows in the UniProt-annotated table may need to be sorted so that they match those in the original hits table, before being integrated into the results spreadsheet.



## Supplemental Method S7

### Procedure for generating a network diagram (using STRING).

1. ***In the results spreadsheet:*** select the list of gene symbols or UniProt IDs, and copy these to the clipboard.
2. ***In a web browser:*** go to the STRING “multiple names” tab. Web-link:  
[http://string-db.org/newstring\\_cgi/show\\_input\\_page.pl?&input\\_page\\_type=multiple\\_identifiers](http://string-db.org/newstring_cgi/show_input_page.pl?&input_page_type=multiple_identifiers)  
In the box headed “list of names”, paste in the gene symbols or UniProt IDs. Click “GO!”.  
A list of protein names matched to the IDs will be presented. Click “Continue ->”.

A STRING network diagram should then be displayed. The default view is the “evidence view”, i.e. with interactions (edges) colored by interaction type. From here, various alternative view options can be explored, and the positions of the proteins can be adjusted. The “save” button allows the diagram to be saved as a high-resolution graphic.

## Supplemental References

- Alcántara, R., *et al.* (2013). The EBI enzyme portal. *Nucleic Acids Res* *41*, D773-780.
- Amberger, J., Bocchini, C., and Hamosh, A. (2011). A new face and new challenges for Online Mendelian Inheritance in Man (OMIM). *Human mutation* *32*, 564-567.
- Arnaud, M.B., *et al.* (2012). The Aspergillus Genome Database (AspGD): recent developments in comprehensive multispecies curation, comparative genomics and community resources. *Nucleic Acids Res* *40*, D653-659.
- Asplund, A., Edqvist, P.H., Schwenk, J.M., and Ponten, F. (2012). Antibodies for profiling the human proteome-The Human Protein Atlas as a resource for cancer research. *Proteomics* *12*, 2067-2077.
- Bao, Y., Federhen, S., Leipe, D., Pham, V., Resenchuk, S., Rozanov, M., Tatusov, R., and Tatusova, T. (2004). National center for biotechnology information viral genomes project. *J Virol* *78*, 7291-7298.
- Barrett, T., *et al.* (2013). NCBI GEO: archive for functional genomics data sets--update. *Nucleic Acids Res* *41*, D991-995.
- Basu, S., Fey, P., Pandit, Y., Dodson, R., Kibbe, W.A., and Chisholm, R.L. (2013). dictyBase 2013: integrating multiple Dictyostelid species. *Nucleic Acids Res* *41*, D676-683.
- Becker, K.G., Barnes, K.C., Bright, T.J., and Wang, S.A. (2004). The genetic association database. *Nat Genet* *36*, 431-432.
- Bento, A.P., *et al.* (2014). The ChEMBL bioactivity database: an update. *Nucleic Acids Res* *42*, D1083-1090.
- Blake, J.A. (2013). Gene Ontology Annotations and Resources. *Nucleic Acids Res* *41*, D530-D535.
- Boeker, M., Vach, W., and Motschall, E. (2013). Google Scholar as replacement for systematic literature searches: good relative recall and precision are not enough. *BMC Med Res Methodol* *13*, 131.
- Bragin, E., Chatzimichali, E.A., Wright, C.F., Hurles, M.E., Firth, H.V., Bevan, A.P., and Swaminathan, G.J. (2014). DECIPHER: database for the interpretation of phenotype-linked plausibly pathogenic sequence and copy-number variation. *Nucleic Acids Res* *42*, D993-D1000.
- Bulusu, K.C., Tym, J.E., Coker, E.A., Schierz, A.C., and Al-Lazikani, B. (2014). canSAR: updated cancer research and drug discovery knowledgebase. *Nucleic Acids Res* *42*, D1040-1047.
- Cerami, E.G., Gross, B.E., Demir, E., Rodchenkov, I., Babur, O.n., Anwar, N., Schultz, N., Bader, G.D., and Sander, C. (2011). Pathway Commons, a web resource for biological pathway data. *Nucleic acids research* *39*, D685-690.
- Chatr-Aryamontri, A., *et al.* (2013). The BioGRID interaction database: 2013 update. *Nucleic Acids Res* *41*, D816-823.
- Chernorudskiy, A.L., Garcia, A., Eremin, E.V., Shorina, A.S., Kondratieva, E.V., and Gainullin, M.R. (2007). UbiProt: a database of ubiquitylated proteins. *BMC Bioinformatics* *8*, 126.
- Costanzo, M.C., *et al.* (2014). Saccharomyces genome database provides new regulation data. *Nucleic Acids Res* *42*, D717-725.

- Croft, D., *et al.* (2014). The Reactome pathway knowledgebase. *Nucleic Acids Res* 42, D472-477.
- Davis, A.P., *et al.* (2013). The Comparative Toxicogenomics Database: update 2013. *Nucleic Acids Res* 41, D1104-1114.
- de Beer, T.A., Berka, K., Thornton, J.M., and Laskowski, R.A. (2014). PDBsum additions. *Nucleic Acids Res* 42, D292-296.
- Dinkel, H., Chica, C., Via, A., Gould, C.M., Jensen, L.J., Gibson, T.J., and Diella, F. (2011). Phospho.ELM: a database of phosphorylation sites--update 2011. *Nucleic Acids Res* 39, D261-267.
- Dinkel, H., *et al.* (2014). The eukaryotic linear motif resource ELM: 10 years and counting. *Nucleic Acids Res* 42, D259-266.
- Drabkin, H.J., and Blake, J.A. (2012). Manual Gene Ontology annotation workflow at the Mouse Genome Informatics Database. *Database (Oxford)* 2012, bas045.
- Fernandez, J.M., Hoffmann, R., and Valencia, A. (2007). iHOP web services. *Nucleic Acids Res* 35, W21-26.
- Finn, R.D., *et al.* (2014). Pfam: the protein families database. *Nucleic Acids Res* 42, D222-230.
- Fleischmann, A., Darsow, M., Degtyarenko, K., Fleischmann, W., Boyce, S., Axelsen, K.B., Bairoch, A., Schomburg, D., Tipton, K.F., and Apweiler, R. (2004). IntEnz, the integrated relational enzyme database. *Nucleic Acids Res* 32, D434-437.
- Flicek, P., *et al.* (2014). Ensembl 2014. *Nucleic Acids Res* 42, D749-755.
- Forbes, S.A., *et al.* (2011). COSMIC: mining complete cancer genomes in the Catalogue of Somatic Mutations in Cancer. *Nucleic Acids Res* 39, D945-950.
- Franceschini, A., *et al.* (2013). STRING v9.1: protein-protein interaction networks, with increased coverage and integration. *Nucleic Acids Res* 41, D808-815.
- Gaudet, P., *et al.* (2013). neXtProt: Organizing Protein Knowledge in the Context of Human Proteome Projects. *J Proteome Res* 12, 293-298.
- Geer, L.Y., Marchler-Bauer, A., Geer, R.C., Han, L., He, J., He, S., Liu, C., Shi, W., and Bryant, S.H. (2010). The NCBI BioSystems database. *Nucleic Acids Res* 38, D492-496.
- Giustini, D., and Barsky, E. (2005). A look at Google Scholar, PubMed, and Scirus: comparisons and recommendations. *J. Canad. Health Libr. Assoc.* 26, 85-89.
- Gnad, F., Gunawardena, J., and Mann, M. (2011). PHOSIDA 2011: the posttranslational modification database. *Nucleic Acids Res* 39, D253-260.
- Good, B.M., Clarke, E.L., de Alfaro, L., and Su, A.I. (2012). The Gene Wiki in 2011: community intelligence applied to human gene annotation. *Nucleic Acids Res* 40, D1255-1261.
- Gray, K.A., Daugherty, L.C., Gordon, S.M., Seal, R.L., Wright, M.W., and Bruford, E.A. (2013). Genenames.org: the HGNC resources in 2013. *Nucleic Acids Res* 41, D545-552.
- Gutmanas, A., *et al.* (2014). PDBe: Protein Data Bank in Europe. *Nucleic Acids Res* 42, D285-291.

- Harris, T.W., *et al.* (2014). WormBase 2014: new views of curated biology. *Nucleic Acids Res* *42*, D789-793.
- Hartshorn, M.J. (2002). AstexViewer: a visualisation aid for structure-based drug design. *J Comput Aided Mol Des* *16*, 871-881.
- Hayles, J., Wood, V., Jeffery, L., Hoe, K.L., Kim, D.U., Park, H.O., Salas-Pino, S., Heichinger, C., and Nurse, P. (2013). A genome-wide resource of cell cycle and cell shape genes of fission yeast. *Open Biol* *3*, 130053.
- He, Y., *et al.* (2012). dbDEPC 2.0: updated database of differentially expressed proteins in human cancers. *Nucleic Acids Res* *40*, D964-971.
- Hedegaard, J., *et al.* (2009). Methods for interpreting lists of affected genes obtained in a DNA microarray experiment. *BMC Proc* *3 Suppl 4*, S5.
- Herraez, A. (2006). Biomolecules in the computer: Jmol to the rescue. *Biochem Mol Biol Educ* *34*, 255-261.
- Hibbs, M.A., Hess, D.C., Myers, C.L., Huttenhower, C., Li, K., and Troyanskaya, O.G. (2007). Exploring the functional landscape of gene expression: directed search of large microarray compendia. *Bioinformatics* *23*, 2692-2699.
- Hornbeck, P.V., Kornhauser, J.M., Tkachev, S., Zhang, B., Skrzypek, E., Murray, B., Latham, V., and Sullivan, M. (2012). PhosphoSitePlus: a comprehensive resource for investigating the structure and function of experimentally determined post-translational modifications in man and mouse. *Nucleic Acids Res* *40*, D261-270.
- Howe, D.G., *et al.* (2013). ZFIN, the Zebrafish Model Organism Database: increased support for mutants and transgenics. *Nucleic Acids Res* *41*, D854-860.
- Huang da, W., Sherman, B.T., and Lempicki, R.A. (2009a). Bioinformatics enrichment tools: paths toward the comprehensive functional analysis of large gene lists. *Nucleic Acids Res* *37*, 1-13.
- Huang da, W., Sherman, B.T., and Lempicki, R.A. (2009b). Systematic and integrative analysis of large gene lists using DAVID bioinformatics resources. *Nat Protoc* *4*, 44-57.
- Hunter, S., *et al.* (2012). InterPro in 2011: new developments in the family and domain prediction database. *Nucleic Acids Res* *40*, D306-D312.
- Huntley, R.P., Binns, D., Dimmer, E., Barrell, D., O'Donovan, C., and Apweiler, R. (2009). QuickGO: a user tutorial for the web-based Gene Ontology browser. *Database (Oxford)* *2009*, bap010.
- Hutchins, J.R.A., *et al.* (2010). Systematic analysis of human protein complexes identifies chromosome segregation proteins. *Science* *328*, 593-599.
- James-Zorn, C., *et al.* (2013). Xenbase: expansion and updates of the *Xenopus* model organism database. *Nucleic Acids Res* *41*, D865-870.

- Kanehisa, M., Goto, S., Sato, Y., Kawashima, M., Furumichi, M., and Tanabe, M. (2014). Data, information, knowledge and principle: back to metabolism in KEGG. *Nucleic Acids Res* *42*, D199-205.
- Kapusshesky, M., *et al.* (2012). Gene Expression Atlas update--a value-added database of microarray and sequencing-based functional genomics experiments. *Nucleic Acids Res* *40*, D1077-1081.
- Karolchik, D., *et al.* (2014). The UCSC Genome Browser database: 2014 update. *Nucleic Acids Res* *42*, D764-770.
- Kelder, T., van Iersel, M.P., Hanspers, K., Kutmon, M., Conklin, B.R., Evelo, C.T., and Pico, A.R. (2012). WikiPathways: building research communities on biological pathways. *Nucleic Acids Res* *40*, D1301-1307.
- Kerrien, S., *et al.* (2012). The IntAct molecular interaction database in 2012. *Nucleic Acids Res* *40*, D841-846.
- Kersey, P.J., *et al.* (2014). Ensembl Genomes 2013: scaling up access to genome-wide data. *Nucleic Acids Res* *42*, D546-552.
- Kersey, P.J., Duarte, J., Williams, A., Karavidopoulou, Y., Birney, E., and Apweiler, R. (2004). The International Protein Index: an integrated database for proteomics experiments. *Proteomics* *4*, 1985-1988.
- Kim, D.U., *et al.* (2010). Analysis of a genome-wide set of gene deletions in the fission yeast *Schizosaccharomyces pombe*. *Nat Biotechnol* *28*, 617-623.
- Kouskoumvekaki, I., Shublaq, N., and Brunak, S. (2013). Facilitating the use of large-scale biological data and tools in the era of translational bioinformatics. *Brief Bioinform.*
- Lamesch, P., *et al.* (2012). The Arabidopsis Information Resource (TAIR): improved gene annotation and new tools. *Nucleic Acids Res* *40*, D1202-1210.
- Landrum, M.J., Lee, J.M., Riley, G.R., Jang, W., Rubinstein, W.S., Church, D.M., and Maglott, D.R. (2014). ClinVar: public archive of relationships among sequence variation and human phenotype. *Nucleic Acids Res* *42*, D980-985.
- Laulederkind, S.J., *et al.* (2012). Ontology searching and browsing at the Rat Genome Database. *Database (Oxford)* *2012*, bas016.
- Law, V., *et al.* (2014). DrugBank 4.0: shedding new light on drug metabolism. *Nucleic Acids Res* *42*, D1091-1097.
- Lee, Y., Tsai, J., Sunkara, S., Karamycheva, S., Pertea, G., Sultana, R., Antonescu, V., Chan, a., Cheung, F., and Quackenbush, J. (2005). The TIGR Gene Indices: clustering and assembling EST and known genes and integration with eukaryotic genomes. *Nucleic acids research* *33*, D71-74.
- Lees, J.G., Lee, D., Studer, R.A., Dawson, N.L., Sillitoe, I., Das, S., Yeats, C., Dessailly, B.H., Rentzsch, R., and Orengo, C.A. (2014). Gene3D: Multi-domain annotations for protein sequence and comparative genome analysis. *Nucleic Acids Res* *42*, D240-245.

- Letunic, I., Doerks, T., and Bork, P. (2012). SMART 7: recent updates to the protein domain annotation resource. *Nucleic Acids Res* *40*, D302-305.
- Liebel, U., Kindler, B., and Pepperkok, R. (2005). Bioinformatic "Harvester": a search engine for genome-wide human, mouse, and rat protein resources. *Methods Enzymol* *404*, 19-26.
- Logan-Klumpler, F.J., *et al.* (2012). GeneDB--an annotation database for pathogens. *Nucleic Acids Res* *40*, D98-108.
- Lotia, S., Montojo, J., Dong, Y., Bader, G.D., and Pico, A.R. (2013). Cytoscape app store. *Bioinformatics* *29*, 1350-1351.
- Lu, C.T., Huang, K.Y., Su, M.G., Lee, T.Y., Bretana, N.A., Chang, W.C., Chen, Y.J., and Huang, H.D. (2013). dbPTM 3.0: an informative resource for investigating substrate site specificity and functional association of protein post-translational modifications. *Nucleic Acids Res* *41*, D295-305.
- Madej, T., *et al.* (2012). MMDB: 3D structures and macromolecular interactions. *Nucleic Acids Res* *40*, D461-464.
- Maglott, D., Ostell, J., Pruitt, K.D., and Tatusova, T. (2011). Entrez Gene: gene-centered information at NCBI. *Nucleic Acids Res* *39*, D52-57.
- Marchler-Bauer, A., *et al.* (2013). CDD: conserved domains and protein three-dimensional structure. *Nucleic Acids Res* *41*, D348-352.
- Martin, D., Brun, C., Remy, E., Mouren, P., Thieffry, D., and Jacq, B. (2004). GOToolBox: functional analysis of gene datasets based on Gene Ontology. *Genome Biol* *5*, R101.
- McWilliam, H., Li, W., Uludag, M., Squizzato, S., Park, Y.M., Buso, N., Cowley, A.P., and Lopez, R. (2013). Analysis Tool Web Services from the EMBL-EBI. *Nucleic Acids Res* *41*, W597-600.
- Mi, H., Muruganujan, A., and Thomas, P.D. (2013). PANTHER in 2013: modeling the evolution of gene function, and other gene attributes, in the context of phylogenetic trees. *Nucleic Acids Res* *41*, D377-386.
- Mi, T., *et al.* (2012). Minmotif Miner 3.0: database expansion and significantly improved reduction of false-positive predictions from consensus sequences. *Nucleic Acids Res* *40*, D252-260.
- Mosca, R., Ceol, A., and Aloy, P. (2013). Interactome3D: adding structural details to protein networks. *Nat Methods* *10*, 47-53.
- Müller, H.M., Kenny, E.E., and Sternberg, P.W. (2004). Textpresso: an ontology-based information retrieval and extraction system for biological literature. *PLoS Biol* *2*, e309.
- NCBI. (2014). Database resources of the National Center for Biotechnology Information. *Nucleic Acids Res* *42*, D7-D17.
- Neumann, B., *et al.* (2010). Phenotypic profiling of the human genome by time-lapse microscopy reveals cell division genes. *Nature* *464*, 721-727.
- Nishimura, D. (2001). A View From the Web: BioCarta. *Biotech Software & Internet Report* *2*, 117-120.

- Obenauer, J.C., Cantley, L.C., and Yaffe, M.B. (2003). Scansite 2.0: Proteome-wide prediction of cell signaling interactions using short sequence motifs. *Nucleic Acids Res* 31, 3635-3641.
- Oldfield, T.J. (2004). A Java applet for multiple linked visualization of protein structure and sequence. *J Comput Aided Mol Des* 18, 225-234.
- Ooi, H.S., Kwo, C.Y., Wildpaner, M., Sirota, F.L., Eisenhaber, B., Maurer-Stroh, S., Wong, W.C., Schleiffer, A., Eisenhaber, F., and Schneider, G. (2009). ANNIE: integrated de novo protein sequence annotation. *Nucleic Acids Res* 37, W435-440.
- Orchard, S., *et al.* (2012). Protein interaction data curation: the International Molecular Exchange (IMEx) consortium. *Nat Methods* 9, 345-350.
- Pickett, B.E., *et al.* (2012). ViPR: an open bioinformatics database and analysis resource for virology research. *Nucleic Acids Res* 40, D593-598.
- Reardon, S. (2013). Project ranks billions of drug interactions. *Nature* 503, 449-450.
- Reich, M., Liefeld, T., Gould, J., Lerner, J., Tamayo, P., and Mesirov, J.P. (2006). GenePattern 2.0. *Nat Genet* 38, 500-501.
- Rose, P.W., *et al.* (2013). The RCSB Protein Data Bank: new resources for research and education. *Nucleic Acids Res* 41, D475-D482.
- Rustici, G., *et al.* (2013). ArrayExpress update--trends in database growth and links to data analysis tools. *Nucleic Acids Res* 41, D987-990.
- Saito, R., Smoot, M.E., Ono, K., Ruscheinski, J., Wang, P.L., Lotia, S., Pico, A.R., Bader, G.D., and Ideker, T. (2012). A travel guide to Cytoscape plugins. *Nat Methods* 9, 1069-1076.
- Salomonis, N., Hanspers, K., Zambon, A.C., Vranizan, K., Lawlor, S.C., Dahlquist, K.D., Doniger, S.W., Stuart, J., Conklin, B.R., and Pico, A.R. (2007). GenMAPP 2: new features and resources for pathway analysis. *BMC Bioinformatics* 8, 217.
- Schomburg, I., *et al.* (2013). BRENDA in 2013: integrated reactions, kinetic data, enzyme function data, improved disease classification: new options and contents in BRENDA. *Nucleic Acids Res* 41, D764-772.
- Schreiber, F., Patricio, M., Muffato, M., Pignatelli, M., and Bateman, A. (2014). TreeFam v9: a new website, more species and orthology-on-the-fly. *Nucleic Acids Res* 42, D922-925.
- Sigrist, C.J., de Castro, E., Cerutti, L., Cucho, B.A., Hulo, N., Bridge, A., Bougueleret, L., and Xenarios, I. (2013). New and continuing developments at PROSITE. *Nucleic Acids Res* 41, D344-347.
- Smith, R.N., *et al.* (2012). InterMine: a flexible data warehouse system for the integration and analysis of heterogeneous biological data. *Bioinformatics* 28, 3163-3165.
- Smoot, M.E., Ono, K., Ruscheinski, J., Wang, P.-L., and Ideker, T. (2011). Cytoscape 2.8: new features for data integration and network visualization. *Bioinformatics (Oxford, England)* 27, 431-432.
- Sönnichsen, B., *et al.* (2005). Full-genome RNAi profiling of early embryogenesis in *Caenorhabditis elegans*. *Nature* 434, 462-469.



- St Pierre, S.E., Ponting, L., Stefancsik, R., and McQuilton, P. (2014). FlyBase 102--advanced approaches to interrogating FlyBase. *Nucleic Acids Res* *42*, D780-788.
- Stelzer, G., *et al.* (2011). In-silico human genomics with GeneCards. *Hum Genomics* *5*, 709-717.
- Suzek, B.E., Huang, H., McGarvey, P., Mazumder, R., and Wu, C.H. (2007). UniRef: comprehensive and non-redundant UniProt reference clusters. *Bioinformatics* *23*, 1282-1288.
- Tabas-Madrid, D., Nogales-Cadenas, R., and Pascual-Montano, A. (2012). GeneCodis3: a non-redundant and modular enrichment analysis tool for functional genomics. *Nucleic Acids Res* *40*, W478-483.
- Tassy, O., *et al.* (2010). The ANISEED database: digital representation, formalization, and elucidation of a chordate developmental program. *Genome Res* *20*, 1459-1468.
- UniProt. (2014). Activities at the Universal Protein Resource (UniProt). *Nucleic Acids Res* *42*, D191-198.
- Valentin, F., Squizzato, S., Goujon, M., McWilliam, H., Paern, J., and Lopez, R. (2010). Fast and efficient searching of biological data resources--using EB-eye. *Brief Bioinform* *11*, 375-384.
- Villaveces, J.M., Jimenez, R.C., Garcia, L.J., Salazar, G.A., Gel, B., Mulder, N., Martin, M., Garcia, A., and Hermjakob, H. (2011). Dasty3, a WEB framework for DAS. *Bioinformatics* *27*, 2616-2617.
- Wang, Y., Geer, L.Y., Chappey, C., Kans, J.A., and Bryant, S.H. (2000). Cn3D: sequence and structure views for Entrez. *Trends Biochem Sci* *25*, 300-302.
- Wang, Y., Suzek, T., Zhang, J., Wang, J., He, S., Cheng, T., Shoemaker, B.A., Gindulyte, A., and Bryant, S.H. (2014). PubChem BioAssay: 2014 update. *Nucleic Acids Res* *42*, D1075-1082.
- Wang, Y., Xiao, J., Suzek, T.O., Zhang, J., Wang, J., and Bryant, S.H. (2009). PubChem: a public information system for analyzing bioactivities of small molecules. *Nucleic Acids Res* *37*, W623-633.
- Wolfsberg, T.G., Wetterstrand, K.A., Guyer, M.S., Collins, F.S., and Baxevanis, A.D. (2002). A user's guide to the human genome. *Nat Genet* *32 Suppl*, 1-79.
- Wood, V., *et al.* (2012). PomBase: a comprehensive online resource for fission yeast. *Nucleic Acids Res* *40*, D695-D699.
- Wu, C., Macleod, I., and Su, A.I. (2013). BioGPS and MyGene.info: organizing online, gene-centric information. *Nucleic Acids Res* *41*, D561-565.
- Zambon, A.C., Gaj, S., Ho, I., Hanspers, K., Vranizan, K., Evelo, C.T., Conklin, B.R., Pico, A.R., and Salomonis, N. (2012). GO-Elite: a flexible solution for pathway and ontology over-representation. *Bioinformatics* *28*, 2209-2210.
